# Supplementary material for: Psychometric properties of gross motor assessment tools for children: a systematic review
Source: PubMed Central journal article supplement — BMJ Open. 2018 Oct 27;8(10):e021734. doi: 10.1136/bmjopen-2018-021734 (PMC6224743; doi:10.1136/bmjopen-2018-021734), 2018-10-27
Supplement: bmjopen-2018-021734.draft_revisions.pdf [file bmjopen-2018-021734.draft_revisions.pdf]

# BMJ Open

BMJ Open is committed to open peer review. As part of this commitment we make the peer review history of every article we publish publicly available.

When an article is published we post the peer reviewers' comments and the authors' responses online. We also post the versions of the paper that were used during peer review. These are the versions that the peer review comments apply to.

The versions of the paper that follow are the versions that were submitted during the peer review process. They are not the versions of record or the final published versions. They should not be cited or distributed as the published version of this manuscript.

BMJ Open is an open access journal and the full, final, typeset and author-corrected version of record of the manuscript is available on our site with no access controls, subscription charges or pay-per-view fees (<http://bmjopen.bmj.com>).

If you have any questions on BMJ Open's open peer review process please email [info.bmjopen@bmj.com](mailto:info.bmjopen@bmj.com)

# BMJ Open

## Psychometric properties of gross motor assessment tools for children: a systematic review

|                               |                                                                                                                                                                                                                                                                                                                                                                                                                                            |
|-------------------------------|--------------------------------------------------------------------------------------------------------------------------------------------------------------------------------------------------------------------------------------------------------------------------------------------------------------------------------------------------------------------------------------------------------------------------------------------|
| Journal:                      | <i>BMJ Open</i>                                                                                                                                                                                                                                                                                                                                                                                                                            |
| Manuscript ID                 | bmjopen-2018-021734                                                                                                                                                                                                                                                                                                                                                                                                                        |
| Article Type:                 | Research                                                                                                                                                                                                                                                                                                                                                                                                                                   |
| Date Submitted by the Author: | 15-Jan-2018                                                                                                                                                                                                                                                                                                                                                                                                                                |
| Complete List of Authors:     | Griffiths, Alison; Monash University, Physiotherapy; The Royal Children's Hospital, Physiotherapy<br>Toovey, Rachel; Murdoch Childrens Research Institute, Developmental Disability and Rehabilitation Research; University of Melbourne, Physiotherapy<br>Morgan, Prue; Monash University, Physiotherapy<br>Spittle, Alicia; University of Melbourne, Physiotherapy; Murdoch Childrens Research Institute, Victorian Infant Brain Studies |
| Keywords:                     | PAEDIATRICS, REHABILITATION MEDICINE, validity, gross motor assessment, reliability                                                                                                                                                                                                                                                                                                                                                        |
|                               |                                                                                                                                                                                                                                                                                                                                                                                                                                            |

SCHOLARONE™  
Manuscripts

Peer Review Only

# Psychometric properties of gross motor assessment tools for children: a systematic review

Alison Griffiths<sup>1,2,3</sup>, Rachel Toovey<sup>3,4</sup>, Prue E. Morgan<sup>1</sup>, Alicia J. Spittle<sup>3,4</sup>

1. Department of Physiotherapy, School of Primary and Allied Health Care, Monash University, Frankston, Victoria, Australia

2. Department of Physiotherapy, The Royal Children's Hospital, Parkville, Victoria, Australia

3. Murdoch Children's Research Institute, Parkville, Victoria, Australia

4. Department of Physiotherapy, The University of Melbourne, Parkville, Victoria, Australia

## Corresponding Author:

Name: A/Prof Alicia J. Spittle

Address: Department of Physiotherapy, The University of Melbourne, Level 7 Alan Gilbert Building, 161 Barry Street, Parkville, Vic 3010, Australia

Email: [aspittle@unimelb.edu.au](mailto:aspittle@unimelb.edu.au)

**Funding:** This study was part-funded by grants from the National Health and Medical Research Council Career Development Fellowship (AJS) 1053767 and Centre of Research Excellence in Newborn Medicine 1060733 (AJS and AG) and the Victorian Government's Operational Infrastructure Support Program.

**Financial disclosure:** The authors have declared that they have no financial relationships relevant to this article.

**Conflict of interest:** The authors have no conflict of interest.

**Keywords:** paediatrics, reliability, validity, rehabilitation medicine, gross motor assessment

# Abstract

## Objective:

Gross motor assessment tools have a critical role in identifying, diagnosing and evaluating motor difficulties in childhood. The objective of this review was to systematically evaluate the psychometric properties and clinical utility of gross motor assessment tools for children 2-12 years.

## Method:

A systematic search of MEDLINE, Embase, CINAHL and AMED was performed. Methodological quality was assessed with the CONsensus-based Standards for the selection of health status Measurement INstruments (COSMIN) checklist and an outcome measures rating form was used to evaluate reliability, validity and clinical utility of assessment tools.

## Results:

Seven assessment tools from 37 studies/manuals met the inclusion criteria: Bayley Scale of Infant and Toddler Development-III (Bayley-III), Bruininks-Oseretsky Test of Motor Proficiency-2 (BOT-2), Movement Assessment Battery for Children-2 (MABC-2), McCarron Assessment of Neuromuscular Development (MAND), Neurological Sensory Motor Developmental Assessment (NSMDA), Peabody Developmental Motor Scales-2 (PDMS-2) and Test of Gross Motor Development-2 (TGMD-2). Methodological quality varied from poor to excellent. Validity and internal consistency varied from fair to excellent ( $\alpha$  0.5-0.99). The Bayley-III, NSMDA and MABC-2 have evidence of predictive validity. Test re-test reliability is excellent in the BOT-2 (ICC=0.80-0.99), PDMS-2 (ICC=0.97), MABC-2 (ICC=0.83-0.96) and TGMD-2 (ICC=0.81-0.92). TGMD-2 has the highest interrater (ICC 0.88-0.93) and intrarater reliability (ICC=0.92-0.99).

## Conclusions:

The majority of gross motor assessments for children have good-excellent validity. Test-retest reliability is highest in the BOT-2, MABC-2, PDMS-2 and TGMD-2. The Bayley-III has the best predictive validity at 2 years of age for later motor outcome. None of the

1  
2  
3 1 assessment tools demonstrate good evaluative validity. Further research on evaluative gross  
4  
5 2 motor assessment tools are urgently needed.  
6  
7  
8

### 9 3 Strengths and limitations of this study

- 10  
11 4 • This systematic review comprehensively assesses methodological quality of included  
12 studies using the COSMIN checklist.  
13  
14 5  
15 6 • Results of this systematic review can provide guidance to clinicians when choosing  
16 gross motor assessment tools based on test psychometric properties and clinical  
17 utility.  
18  
19 8  
20 9 • Areas for future research are identified including improving the evidence of inter and  
21 intrarater reliability and responsiveness to change as well as the ascertainment of  
22 predictive validity over a longer period of time.  
23  
24 11  
25 12 • Only articles or test manuals written in English were included.  
26  
27  
28  
29  
30  
31  
32  
33  
34  
35  
36  
37  
38  
39  
40  
41  
42  
43  
44  
45  
46  
47  
48  
49  
50  
51  
52  
53  
54  
55  
56  
57  
58  
59  
60

## 1 Introduction

2 Motor function promotes cognitive and perceptual development in children and contributes  
3 to their ability to participate in their home, school and community environments<sup>1</sup>. Motor  
4 impairment can negatively affect activity and participation levels of children<sup>2</sup>, which may  
5 lead to lower levels of physical activity, fitness and health into adulthood<sup>3</sup>. While severe  
6 motor deficits are usually diagnosed before 2 years of age, mild motor deficits may not  
7 become evident until children are in preschool and primary school environments where  
8 they are exposed to increasingly complex tasks and compared to their peers<sup>3</sup>. Identification  
9 of motor difficulties is an important step towards support and intervention for the child and  
10 their family.

11 Healthcare professionals and researchers require standardised assessment tools to identify,  
12 classify and diagnose motor problems in children<sup>4</sup>. Further, assessment tools are essential  
13 to monitor the effects of intervention<sup>4</sup>. There is no gold standard of motor assessment for  
14 children and the available tests vary in their ease of use and interpretability in clinical and  
15 research settings, and whether they are norm or criterion referenced<sup>5</sup>. Criterion referenced  
16 tests are designed to be scored as items or criteria are demonstrated; meaning that the  
17 score is a reflection of a child's competence on the test items. Most available assessments  
18 however, are norm referenced, meaning that a child's results are reported in relation to a  
19 specific population<sup>4</sup>. The characteristics of the normed population should be taken into  
20 consideration when interpreting test results as environmental and cultural differences have  
21 been found to affect motor development<sup>6</sup>.

22 Health professionals should be aware of the validity and reliability of assessment tools to  
23 assist in their instrument selection and interpretation of results. Validity refers to "The  
24 degree to which [an instrument] is an adequate reflection of the construct to be measured"  
25<sup>7</sup>. If an instrument does not have adequate construct or content validity then it may not be  
26 assessing the skills that it purports to. Reliability refers to "the degree to which the  
27 measurement is free from measurement error"<sup>7</sup>, which is significant when interpreting  
28 results. If a child is assessed as being significantly delayed in their gross motor skills, the  
29 reliability of that tool indicates the likelihood that a result is due to error.

1  
2  
3 1 A systematic review in 2010 by Slater<sup>8</sup> evaluated performance-based gross motor tests for  
4 2 children with developmental coordination disorder, however it did not include the second  
5 3 and most recent version of the Movement Assessment Battery for Children 2 (MABC-2),  
6 4 which is widely used. Brown and Lalor<sup>9</sup> suggested that as a result of the changes to the  
7 5 original Movement Assessment Battery for Children (MABC) in age range, age bands,  
8 6 materials and tasks, that the MABC-2 requires independent reliability and validity  
9 7 assessment. Over the past eight years there has been a significant increase in the number of  
10 8 papers assessing the psychometric properties of motor assessment tools in children. A  
11 9 systematic review of these and previous papers is warranted, in order to add to our  
12 10 understanding of the psychometrics of standardised gross motor assessment tools.

11 11 The primary aim of this systematic review is to identify and evaluate the clinical utility and  
12 12 psychometric properties of gross motor assessment tools appropriate for use in preschool  
13 13 and school age children from 2-12 years. The secondary aim of this review is to identify the  
14 14 methodological quality of the included studies and areas for further research.

## 15 Method

16 16 A comprehensive search strategy was completed in databases OVID Medline (1996 to May  
17 17 2017), CINAHL plus (1937 to July 2017), Embase (1974 – May 2017) and AMED (1985 – July  
18 18 2017). The search strategy used MeSH terms and text words for ('child' or 'paediatric') and  
19 19 ('motor skills' or motor activity' or 'gross motor' or 'psychomotor' or 'developmental  
20 20 coordination disorder') and ('questionnaires' or 'outcome assessment' or 'instrument' or  
21 21 'task performance') and ('reliability' or 'validity' or 'psychometrics'). Reference lists of  
22 22 included articles were also screened to identify any additional papers. If full texts were  
23 23 unavailable or further information required regarding availability of manuals authors were  
24 24 contacted.

25 25 Assessment tools were included if they were 1. Discriminative, predictive or evaluative of  
26 26 gross motor skills, 2. Assessed  $\geq$  two gross motor (e.g. balance, jumping etc.) items, 3. Able  
27 27 to extract a meaningful gross motor sub-score, 4. Applicable to children 2-12 years of age, 5.  
28 28 Criterion or norm referenced test with a standardised assessment procedure and 6.  
29 29 Instructional manuals are published or commercially available.

1  
2  
3 1 Articles describing use of the assessment tool were included if  $\geq 90\%$  of the study  
4 population were within 2-12 years of age, it was available in English and if validity and/or  
5 reliability of the assessment tool was reported.  
6  
7

8  
9 4 Assessment tools were excluded if they met any of the following criteria 1. Questionnaires  
10 or screening tools, 2. Only applicable to children with a specific diagnosis (e.g. cerebral  
11 palsy, Down's syndrome), 3. Test manuals not available in English and 4. The version of the  
12 test has been superseded.  
13  
14  
15

16  
17 8 Titles and abstracts were screened by the first author. The remaining papers were obtained  
18 in full text and reviewed by two authors (AG, RT or PM) with selection based on inclusion  
19 and exclusion criteria. Papers and assessment tools were included after agreement by both  
20 raters, with conflicting decisions discussed until a consensus was reached.  
21  
22  
23

24  
25 12 Methodological assessment of the papers was completed using the four-point scale of the  
26 COnsensus-based Standards for the selection of health status Measurement INstruments  
27 (COSMIN) checklist<sup>10</sup>. The COSMIN incorporates three quality domains: Validity, Reliability  
28 and Responsiveness consisting of nine measurement properties: content, construct, cross  
29 cultural and criterion validity, hypothesis testing, internal consistency, reliability,  
30 measurement error and responsiveness<sup>7</sup> (Supplementary Table 1).  
31  
32  
33  
34

35  
36 18 The overall score for each measurement property on the COSMIN checklist is determined by  
37 a 'worse score counts' approach<sup>10</sup>. Each property is rated as excellent, good, fair or poor  
38 methodological quality based on descriptive criteria. Data extraction and assessment of  
39 methodological quality was performed independently by two assessors (AG and RT). In the  
40 case of any uncertainty a third reviewer (AS) performed a COSMIN assessment and  
41 disagreement was resolved through discussion.  
42  
43  
44  
45

46  
47 24 A data extraction form for each assessment tool was adapted from the CanChild Outcome  
48 Measures Rating Form to collate information on clinical utility, validity, reliability and  
49 responsiveness<sup>11</sup>. Clinical utility includes the cost of manuals, kits, training requirements,  
50 time to administer the assessment and the ease of scoring. All reported values for reliability  
51 were collected with Intraclass Correlation Coefficients (ICC) directly compared.  
52  
53  
54  
55



## Results

Figure 1 provides details of study selection. Eight assessment tools were identified for inclusion; Bayley Scale of Infant and Toddler Development III (Bayley-III), Bruininks-Oseretsky Test of Motor Proficiency 2 (BOT-2), Movement Assessment Battery for Children 2 (MABC-2), McCarron Assessment of Neuromuscular Development (MAND), Neurological Sensory Motor Developmental Assessment (NSMDA), Peabody Developmental Motor Scales 2 (PDMS-2), and Test of Gross Motor Development 2 (TGMD-2). The corresponding manuals were then added to the final yield resulting in 30 papers and 7 manuals. Nineteen assessment tools were excluded (Supplementary Table 2).

The majority of assessment tools identified in this review are discriminative and most lend themselves towards use in a research setting. All norm referenced tools are from western countries and each identified test covers a different age range as shown in Table 1.

Most of the tools assess at least two domains of function: gross motor and fine motor skills, although the Bayley III and the NSMDA assess six to seven different domains of development. The TGMD-2 is the only tool that only assesses gross motor skills.

There is some consistency of items included within the gross motor skill subsets between tests. Most include a locomotion task such as walking, running or stair climbing; an object control or manipulation task such as throwing or catching a ball; and a static or dynamic balance task such as standing on one leg or hopping. The PDMS-2 and the MAND also include strength assessments (the PDMS-2 only in some age groups).

The number of gross motor items for assessment vary both within and between the tools (Table 1). For example, the number of items tested in the Bayley-III and the PDMS-2 depends on the age and ability of the child. Several assessments report criteria for describing gross motor delay, although all test manuals warn against diagnosing delay based on a single assessment.

Table 1. Gross Motor Assessment Tool Characteristics

| Assessment Tool                 | Domains Tested                                                                                             | Gross motor components tested                                                                                                                          | Age range      | Diagnostic criteria                                                                                       | Primary purpose              | Secondary purpose                     | Type of test | Normative sample (year)                  |
|---------------------------------|------------------------------------------------------------------------------------------------------------|--------------------------------------------------------------------------------------------------------------------------------------------------------|----------------|-----------------------------------------------------------------------------------------------------------|------------------------------|---------------------------------------|--------------|------------------------------------------|
| <b>Bayley-III</b> <sup>12</sup> | Gross motor, fine motor, cognitive, communication, social/emotional, adaptive                              | Static postures, dynamic movement, balance                                                                                                             | 1 mth – 3 yrs  | Developmental delay: <25th centile or below 2SD. *                                                        | Discriminative               | Predictive, Evaluative, Research tool | Norm         | 1700 children from the USA (2000)        |
| <b>BOT-2</b> <sup>13</sup>      | Gross motor, fine motor                                                                                    | Coordination, balance, running speed and agility, strength                                                                                             | 4 – 21 yrs     | *                                                                                                         | Discriminative<br>Evaluative | Research tool                         | Norm         | 1520 children from the USA (2005)        |
| <b>MABC-2</b> <sup>14</sup>     | Gross motor, fine motor, balance                                                                           | Aiming and catching, static and dynamic balance                                                                                                        | 3 – 16 yrs     | Traffic light system: Green = normal, amber = 'at risk' and red = definite motor impairment (<15%). *     | Discriminative<br>Evaluative | Intervention planning, Research tool  | Norm         | 1172 children from United Kingdom (2006) |
| <b>MAND</b> <sup>15</sup>       | Gross and fine motor                                                                                       | Coordination, jumping, static and dynamic balance                                                                                                      | 3 yrs – 25 yrs | NDI 70-85 = mild<br>55-69 = moderate<br><55 = severe disability *                                         | Evaluative                   | Research tool                         | Norm         | 2000 3-35 yrs from the USA (1970's)      |
| <b>NSMDA</b> <sup>16</sup>      | Gross Motor, Fine Motor, Neurological, Postural Development, Infant Patterns of Movement, Sensory Motor. † | Sitting, kneeling, walking, balance, running, hopping, jumping, catching, motor planning                                                               | 1 mth – 6 yrs  | Total score 6-8 normal, 9-11 minimal, 12-14 mild, 15-19 moderate, 20-25 severe, >25 profound disability * | Evaluative<br>Discriminative | Predictive, Research tool             | Criterion    | N/A                                      |
| <b>PDMS-2</b> <sup>17</sup>     | Gross motor, fine motor                                                                                    | Stationary (standing balance, sit-ups, push-ups), locomotion (walking, running, jumping, hopping, etc.), object manipulation (kick, throw, hit, catch) | Birth – 5 yrs  | *                                                                                                         | Discriminative<br>Evaluative | Predictive, Research tool             | Norm         | 2003 USA and Canada (1997-8)             |

1  
2  
3  
4  
5  
6  
7  
8  
9  
10  
11  
12  
13  
14  
15  
16  
17  
18  
19  
20  
21  
22  
23  
24  
25  
26  
27  
28  
29  
30  
31  
32  
33  
34  
35  
36  
37  
38  
39  
40  
41  
42  
43  
44  
45  
46  
47

|                             |             |                                                                                                                   |            |   |                           |                                                       |      |                               |
|-----------------------------|-------------|-------------------------------------------------------------------------------------------------------------------|------------|---|---------------------------|-------------------------------------------------------|------|-------------------------------|
| <b>TGMD-2</b> <sup>19</sup> | Gross Motor | Locomotion (run, gallop, hop leap, jump, slide) and Object control (batting, dribbling, catch, kick, throw, roll) | 3 – 10 yrs | * | Discriminative Evaluative | Outcome measure, research tool, intervention planning | Norm | 1208 USA children (1997-1998) |
|-----------------------------|-------------|-------------------------------------------------------------------------------------------------------------------|------------|---|---------------------------|-------------------------------------------------------|------|-------------------------------|

Bayley-III, Bayley Scale of Infant and Toddler Development 3<sup>rd</sup> edition;<sup>12</sup> BOT-2, Bruininks-Oseretsky Test of Motor Proficiency 2<sup>nd</sup> edition;<sup>13</sup> MABC-2, Movement Assessment Battery for Children 2<sup>nd</sup> edition;<sup>14</sup> MAND, McCarron Assessment of Neuromuscular Development;<sup>15</sup> NSMDA, Neurological Sensory Motor Developmental Assessment;<sup>16</sup> PDMS-2, Peabody Developmental Motor Scales 2<sup>nd</sup> edition;<sup>17</sup> TGMD-II, Test of Gross Motor Development 2<sup>nd</sup> edition;<sup>19</sup> NDI, Neurodevelopmental Index; SD, Standard Deviation; mth, month; yrs, years \*, Advisable to use clinical reasoning; †, requires some manual handling; USA, United States of America

For peer review only

1  
2  
3 1 The PDMS-2 is notable for the inclusion of credit towards incomplete skills in the scoring system.  
4 2 Most other tests award a point or credit towards a skill only if it is demonstrated to the full  
5 3 satisfaction of the stated criteria (score of 0 or 1). The PDMS-2 however is scored 0-2 allowing for 1  
6 4 mark to be allocated as a child progresses towards a skill without mastering it. The NSMDA marking  
7 5 criteria is somewhat more complicated with a system of scores 1-4 with a symbol of + denoting  
8 6 hyperactive response and – a hyporeactive response. The PDMS-2, MABC-2, BOT-2, MAND, TGMD-2  
9 7 and Bayley-III all require raw scores to be converted to a standard (or scaled) score based on tables  
10 8 supplied in the manuals. For the BOT-2 this is a multiple step process which can then be converted to  
11 9 both sex-specific or combined standard scores and percentile ranks. A summary of assessment tool  
12 10 characteristics can be found in Table 1.

### 11 Clinical Utility

12 The clinical utility of the assessment tools is summarised in Table 2, while scoring and administration  
13 13 is detailed in Supplementary Table 3. The shortest administration time is for the TGMD-2 which has  
14 14 10 items; whilst most manuals report 20-60 minutes is required to complete an assessment. These  
15 15 times are not inclusive of equipment set up, pack up and scoring, which varies depending on the  
16 16 amount of equipment and complexity of the scoring process. All assessments require the user to be  
17 17 familiar with the test before administration and to possess a high level of understanding of child  
18 18 movement and development. The MABC-2 and PDMS-2 are the only assessments that come with  
19 19 supporting material to guide intervention post assessment (when the complete kit is purchased).

### 20 Methodological quality

21 All articles were assessed using the COSMIN checklist to determine methodological quality. Several  
22 22 studies were marked down for failing to report missing data, having small sample sizes and for using  
23 23 inappropriate statistical methods. A summary of the articles and corresponding COSMIN  
24 24 methodology rating is provided in Table 3.

### 25 Validity

26 The content and construct validity of the included assessment tools are summarised in  
27 27 Supplementary Table 4. Most assessments were developed by or with input from experts in the  
28 28 field, with most also performing literature reviews. Bruininks and Bruininks<sup>13</sup> performed  
29 29 comprehensive surveys, pilot, tryout and standardisation studies before finalising the BOT-2,  
30 30 providing the most comprehensively reported content validity.

1  
2  
3 1 Construct validity was confirmed with factor analysis (either exploratory or confirmatory) in most  
4 2 assessment tools. The MABC-2 and the TGMD-2 have the most evidence for construct validity, with  
5 3 the MABC-2 requiring some changes to remain valid in the Chinese and Dutch speaking populations  
6 4 <sup>20 21</sup>. The BOT-2, MABC-2 and TGMD-2 all provide evidence of discriminant validity in particular age  
7 5 or diagnosis groups. The NSMDA has minimal assessment of construct validity in children over 2  
8 6 years. The Bayley-III, NSMDA and MABC-2 are the only assessments that provide evidence of  
9 7 predictive validity (Suppl. Table 5). Concurrent validity between the MABC-2, PDMS-2 and BOT-2 is  
10 8 moderate to high, whilst the TGMD-2 is only weakly correlated with the MABC-2 <sup>5</sup> (Suppl. Table 5).  
11 9 The PDMS-2, TMGD-2 and NSMDA report correlations with other criteria such as paediatrician  
12 10 diagnosis, physical fitness or psychomotor/intelligence tests.  
13 11  
14 12  
15 13

Table 2. Clinical Utility of Gross Motor Assessment Tools

| Assessment Tool                 | Time to administer (min)  | Test Procedure                                                               | Target Examiner population                                                   | Training                                                            | Equipment/Manual                                                               |
|---------------------------------|---------------------------|------------------------------------------------------------------------------|------------------------------------------------------------------------------|---------------------------------------------------------------------|--------------------------------------------------------------------------------|
| <b>Bayley-III</b> <sup>12</sup> | 30-90                     | Therapist administers in standardised order                                  | Paediatric health professionals<br>early childhood specialists               | Formal training not required. DVD, webinars and workshops available | Comprehensive manual/kit: £1089<br>Test kit provides most equipment            |
| <b>BOT-2</b> <sup>13</sup>      | 40-60                     | Therapist administered in standardised order                                 | Paediatric health professionals<br>early childhood specialists               | Formal training not required                                        | Comprehensive manual/kit: £961<br>Test kit provides most equipment             |
| <b>MABC-2</b> <sup>14</sup>     | 20-40                     | Therapist administers items in standardised order. Some flexibility allowed. | Research psychologists, OT, PT,<br>Paediatricians                            | Formal training not required.                                       | Comprehensive manual/ kit: £1191<br>Test kit provides most equipment           |
| <b>MAND</b> <sup>15</sup>       | 15-20                     | Therapist administers items in standardised order.                           | Professionals e.g. education,<br>neurology, OT, PT, psychology etc.          | Formal training not required.                                       | Manual and test kit: £1366 includes equipment                                  |
| <b>NSMDA</b> <sup>16</sup>      | 20-45                     | Observation followed by therapist administration of test items.              | PT, OT                                                                       | Formal training not required (but is available)                     | Comprehensive manual: £35.<br>Equipment not included                           |
| <b>PDMS-2</b> <sup>17</sup>     | 45-60 (20-30 for GM only) | Standardised procedure.                                                      | Paediatric health professionals, PE teachers, early intervention specialists | Formal training not required                                        | Comprehensive manual/kit: £553<br>Includes some but not all equipment required |
| <b>TGMD-2</b> <sup>19</sup>     | 15-20                     | Standardised procedure.                                                      | Teachers, health professionals (OT, PT, doctors)                             | Formal training not required                                        | Kit includes manual and record form: £128.<br>Equipment not included           |

Bayley-III, Bayley Scale of Infant and Toddler Development 3<sup>rd</sup> edition<sup>12</sup>; BOT-2, Bruininks-Oseretsky Test of Motor Proficiency 2<sup>nd</sup> edition<sup>13</sup>; MABC-2, Movement Assessment Battery for Children 2<sup>nd</sup> edition<sup>14</sup>; MAND, McCarron Assessment of Neuromuscular Development<sup>15</sup>; NSMDA, Neurological Sensory Motor Developmental Assessment<sup>16</sup>; PDMS-2, Peabody Developmental Motor Scales 2<sup>nd</sup> edition<sup>17</sup>; TGMD-II, Test of Gross Motor Development 2<sup>nd</sup> edition<sup>19</sup>; GM, Gross motor; OT, Occupational Therapy; PT, Physiotherapy; PE, Physical Education

Table 3. Methodological quality of included articles

| Test                     | First author, Year                       | Country                  | Population<br>(Age,<br>Diagnosis) | Internal<br>consistency | Reliability                             | Measurement<br>error | Content<br>validity | Structural<br>validity | Hypothesis<br>testing | Cross-<br>cultural<br>validity | Criterion<br>validity | Responsive -<br>ness |
|--------------------------|------------------------------------------|--------------------------|-----------------------------------|-------------------------|-----------------------------------------|----------------------|---------------------|------------------------|-----------------------|--------------------------------|-----------------------|----------------------|
| <b>BAYLEY III</b>        | Bayley <sup>12</sup>                     | USA                      | 1-42 mths                         | Fair                    | Fair                                    | Good                 | Excellent           | Good                   | Good                  | -                              | Good                  | -                    |
|                          | Spittle, et al. <sup>4</sup>             | Australia                | 2,4 yrs, Ex<br>prem               | -                       | -                                       | -                    | -                   | -                      | -                     | -                              | Good                  | -                    |
|                          | Visser, et al. <sup>23</sup>             | Netherlands              | 2.2-10.8 yrs,<br>GDD, L.I.        | -                       | -                                       | -                    | Excellent           | Poor                   | -                     | -                              | -                     | -                    |
| <b>BOT-2</b>             | Wuang and Su <sup>24</sup>               | Taiwan                   | 4-12 yrs ID                       | Excellent               | Excellent                               | Excellent            | -                   | -                      | -                     | -                              | -                     | Fair                 |
|                          | Wuang, et al. <sup>25</sup>              | Taiwan                   | 3-6 yrs ID                        | Fair                    | Good                                    | Good                 | -                   | -                      | -                     | -                              | Good                  | Fair                 |
|                          | Bruininks and<br>Bruininks <sup>13</sup> | USA                      | 4-21 yrs                          | Good                    | Fair (interrater)<br>Fair (test-retest) | Good                 | Excellent           | Good                   | -                     | -                              | Good                  | -                    |
| <b>MABC-2<br/>(AB 1)</b> | Ellinoudis, et al. <sup>26</sup>         | Greece                   | 3-5.5 yrs                         | Excellent               | Good                                    | -                    | -                   | -                      | -                     | -                              | -                     | -                    |
|                          | Hua, et al. <sup>20</sup>                | China                    | 3-6 yrs                           | Excellent               | Good                                    | -                    | Excellent           | Excellent              | -                     | Poor                           | Excellent             | -                    |
|                          | Logan, et al. <sup>5</sup>               | USA                      | 3-6 yrs                           | -                       | -                                       | -                    | -                   | -                      | Fair                  | -                              | Fair                  | -                    |
|                          | Smits-Engelsman, et<br>al. <sup>27</sup> | Belgium                  | 3-4 yrs                           | Poor                    | Poor                                    | Poor                 | -                   | -                      | -                     | -                              | -                     | -                    |
|                          | Holm, et al. <sup>28</sup>               | Norway                   | 7-9 yrs                           | -                       | Fair (interrater)<br>Poor (intrarater)  | Poor                 | -                   | -                      | -                     | -                              | -                     | -                    |
| <b>MABC-2<br/>(AB 2)</b> | Kita, et al. <sup>29</sup>               | Japan                    | 7-10 yrs                          | Excellent               | -                                       | -                    | -                   | -                      | -                     | Poor                           | -                     | -                    |
|                          | Griffiths, et al. <sup>30</sup>          | Australia                | 4-8 yrs                           | -                       | -                                       | -                    | -                   | -                      | -                     | -                              | Good                  | -                    |
| <b>MABC-2</b>            | Henderson, et al. <sup>14</sup>          | UK                       | 3-16 yrs                          | -                       | Fair                                    | Good                 | Excellent           | -                      | -                     | -                              | -                     | -                    |
|                          | Niemeijer, et al. <sup>21</sup>          | Netherlands<br>+ Belgium | -                                 | -                       | -                                       | -                    | -                   | -                      | -                     | Poor                           | -                     | -                    |
|                          | Schulz, et al. <sup>31</sup>             | U.K                      | 3-16 yrs                          | -                       | -                                       | -                    | Excellent           | Good                   | -                     | -                              | -                     | -                    |
|                          | Valentini, et al. <sup>32</sup>          | Brazil                   | 3-13 yrs                          | Fair                    | Fair                                    | -                    | Fair                | Poor                   | -                     | Poor                           | Poor                  | -                    |

|               |                                   |             |                   |           |                                         |      |           |           |      |      |           |      |
|---------------|-----------------------------------|-------------|-------------------|-----------|-----------------------------------------|------|-----------|-----------|------|------|-----------|------|
|               | Wuang, et al. <sup>25</sup>       | Taiwan      | 3-6 yrs, ID       | Fair      | Good                                    | Good | -         | -         | -    | -    | Good      | Fair |
|               | Wuang, et al. <sup>33</sup>       | Taiwan      | 6-12 yrs DCD      | Poor      | Fair                                    | Good | -         | -         | -    | -    | -         | Fair |
| <b>MAND</b>   | Hands, et al. <sup>34</sup>       | Australia   | 10-17 yrs         | -         | -                                       | -    | -         | Excellent | -    | -    | -         | -    |
|               | McCarron <sup>15</sup>            | USA         | 7yrs              | -         | -                                       | -    | Fair      | Poor      | -    | -    | Poor      | -    |
| <b>NSMDA</b>  | Danks, et al. <sup>35</sup>       | Australia   | 2 + 4 yrs<br>ELBW | -         | -                                       | -    | -         | -         | -    | -    | Fair      | -    |
|               | MacDonald and Burns <sup>36</sup> | Australia   | 2 + 4 yrs CP      | -         | -                                       | -    | -         | Fair      | -    | -    | Poor      | -    |
|               | Burns, et al. <sup>37</sup>       | Australia   | 1-24 mths<br>VLBW | Poor      | -                                       | -    | Poor      | -         | -    | -    | -         | -    |
|               | Burns, et al. <sup>38</sup>       | Australia   | 1-mnths<br>VLBW   | -         | -                                       | -    | -         | Poor      | -    | -    | Fair      | -    |
| <b>PDMS-2</b> | Hua, et al. <sup>20</sup>         | China       | 3-6 yrs.          | Excellent | Good                                    | -    | Excellent | Excellent | -    | Poor | Excellent | -    |
|               | Wuang, et al. <sup>25</sup>       | Taiwan      | 3-6 yrs ID        | Fair      | Good                                    | Good | -         | -         | -    | -    | Good      | Fair |
|               | Folio and Fewell <sup>17</sup>    | USA         | 0-71 mnths        | Good      | -                                       | Poor | Excellent | Good      | Good | -    | Poor      | -    |
| <b>TGMD-2</b> | Barnett, et al. <sup>39</sup>     | Australia   | 4-8 yrs           | -         | Fair                                    | -    | -         | -         | -    | -    | -         | -    |
|               | Farrokhi, et al. <sup>40</sup>    | Iran        | 3-11 yrs          | Fair      | Fair                                    | -    | Fair      | Fair      | -    | -    | -         | -    |
|               | Houwen, et al. <sup>41</sup>      | Netherlands | 6-12 yrs VI       | Fair      | Fair                                    | -    | -         | Fair      | -    | -    | -         | -    |
|               | Kim, et al. <sup>42</sup>         | Korea       | 8-12 yrs ID       | -         | Poor                                    | -    | -         | -         | -    | -    | -         | -    |
|               | Kim, et al. <sup>43</sup>         | Korea       | 5-6 yrs           | Poor      | Fair                                    | -    | -         | Poor      | -    | -    | Poor      | -    |
|               | Logan, et al. <sup>5</sup>        | USA         | 3-6 yrs           | -         | -                                       | -    | -         | -         | Fair | -    | Fair      | -    |
|               | Rudd, et al. <sup>44</sup>        | Australia   | 6-12 yrs          | -         | -                                       | -    | -         | Good      | -    | -    | -         | -    |
|               | Simons, et al. <sup>45</sup>      | Belgium     | 7-10 yrs ID       | Good      | Good (interrater)<br>Poor (test-retest) | -    | Excellent | Good      | Good | -    | -         | -    |
|               | Valentini <sup>46</sup>           | Brazil      | 3-10 yrs          | Poor      | Fair (test-retest)<br>Good (intra,      | -    | Excellent | Good      | -    | Fair | Good      | -    |



1  
2  
3  
4  
5  
6  
7  
8  
9  
10  
11  
12  
13  
14  
15  
16  
17  
18  
19  
20  
21  
22  
23  
24  
25  
26  
27  
28  
29  
30  
31  
32  
33  
34  
35  
36  
37  
38  
39  
40  
41  
42  
43  
44  
45  
46  
47

| interrater)                       |       |          |      |                    |      |      |      |   |   |      |   |
|-----------------------------------|-------|----------|------|--------------------|------|------|------|---|---|------|---|
| Wong and Yin Cheung <sup>47</sup> | China | 3-10 yrs | -    | -                  | -    | -    | Fair | - | - | -    | - |
| Ulrich <sup>19</sup>              | USA   | 3-10 yrs | Good | Fair (test-retest) | Fair | Poor | Good | - | - | Fair | - |
| Poor (interrater)                 |       |          |      |                    |      |      |      |   |   |      |   |

Bayley-III, Bayley Scale of Infant and Toddler Development 3<sup>rd</sup> edition;<sup>12</sup> BOT-2, Bruininks-Oseretsky Test of Motor Proficiency 2<sup>nd</sup> edition;<sup>13</sup> MABC-2, Movement Assessment Battery for Children 2<sup>nd</sup> edition;<sup>14</sup> MAND, McCarron Assessment of Neuromuscular Development;<sup>15</sup> NSMDA, Neurological Sensory Motor Developmental Assessment;<sup>16</sup> PDMS-2, Peabody Developmental Motor Scales 2<sup>nd</sup> edition;<sup>17</sup> TGMD-II, Test of Gross Motor Development 2<sup>nd</sup> edition;<sup>19</sup> Mths, Months; yrs, years; DCD, Developmental Coordination Disorder; VI, Vision Impairment; ID, Intellectual Disability; GDD, global developmental delay; L.I, Language Impairment; ELBW, Extremely Low Birth Weight; VLBW, Very Low Birth Weight; CP, Cerebral Palsy; prem, premature; USA, United States of America

For peer review only

## 1 Reliability

2 Internal consistency of assessments are summarised in supplementary table 6. The BOT-2's high  
3 internal consistency is well supported, including for children with an intellectual disability<sup>25,48</sup>. The  
4 MABC-2 appears to have lower internal consistency than the BOT-2, which may be related to the  
5 limited number of test items (eight) on the MABC-2. The highest values for internal consistency for  
6 the MABC-2 were obtained in specific populations (Intellectual disability and developmental  
7 coordination disorder) with poor to fair methodology only. Conversely the highest quality articles  
8 reported the lowest values, although it should be noted that these assessed age band 1 (3-6 years)  
9 only. Internal consistency is reported to be high for the PDMS-2, while the MAND does not currently  
10 have published internal consistency data in this age group. The TGMD-2 is reported by two good  
11 quality (and four poor to fair quality) articles to have excellent internal consistency, including for  
12 children with vision impairment and intellectual disability

13 The reliability findings are summarised in Supplementary Table 6 and in Figures 2 and 3. Test-retest  
14 reliability was excellent in the Bayley-III (Supplementary Table 6), BOT-2 and PDMS-2; and was good  
15 to excellent in the MABC-2 and TGMD-2 (Figure 2). Intra-rater reliability was rarely investigated or  
16 reported for most tools, with the TGMD-2 demonstrating better results than the MABC-2 (Figure 3).  
17 Only the TGMD-2 and MABC-2 report inter-rater reliability values using an ICC (Figure 3)<sup>28,39</sup>. Inter-  
18 rater reliability is also supported in the BOT-2 with Pearson Correlation Coefficient and Kappa  
19 respectively. The studies referred to in the test manuals for the TGMD-2, Bayley-III, BOT-2 and  
20 MABC-2 all report reliability findings using Pearson's correlation, which is less ideal than an ICC or  
21 weighted kappa for statistical analysis<sup>49,50</sup>. Only studies reporting ICC's are visually represented in  
22 Figures 2 (test-retest) and 3 (inter and intra-rater). The TGMD-2 test-retest reliability results from  
23 Houwen, et al.<sup>41</sup> were believed to contain an error as the reported ICC was outside of the reported  
24 confidence intervals (ICC 0.92, 0.82-0.91). This data set was therefore excluded from Figure 2.

25 Responsiveness was reported for the Bayley-III, BOT-2, MABC-2 and PDMS-2 with minimal  
26 detectable change (MDC) or a standard error of measurement (SEM)<sup>25</sup>. There have been no studies  
27 to date on the responsiveness of the TGMD-2, NSMDA or MAND.

## 28 Discussion

29 This review identified eight gross motor assessment tools appropriate for use in clinical or research  
30 settings, each with their own strengths and limitations. Interestingly, only one of the eight

1 assessments measured gross motor skills in isolation. This is likely a reflection on current practice to  
2 assess children's development as a whole, rather than assessing individual domains in isolation.

3 The current review adds to the literature by including a thorough methodological assessment using  
4 the COSMIN checklist. Our findings are consistent with an earlier review by Slater, et al.<sup>8</sup> who  
5 reported that the psychometric properties of the TGMD-2 and the BOT-2 were robust in children  
6 with developmental coordination disorder. The MABC-2 and the PDMS-2 were also identified as  
7 well supported assessment tools in this review. All assessment tools were found to have merits and  
8 limitations and should be chosen with consideration for their psychometric properties, clinical utility  
9 and for the population and age group in question.

10 Clinicians and parents who need guidance to set realistic therapy goals and to understand future  
11 intervention requirements benefit from understanding a test's predictive ability. The NSMDA and  
12 the MABC-2 are the only tools that have demonstrated long term ( $\geq 4$  years follow up) predictive  
13 validity, while the Bayley-III has good predictive validity at 2 years for future movement difficulties  
14 and for the diagnosis of cerebral palsy at 4 years. However, further research into the long-term  
15 predictive validity of all included gross motor assessment tools is warranted.

16 While validity and reliability should guide selection of assessment tools, clinical utility must also be  
17 taken into consideration. Most tests have ongoing costs associated with forms and equipment  
18 replacement, which may be prohibitive to some users. The NSMDA requires the therapist to handle  
19 the child for several items which should be considered in relation to manual handling policies of  
20 institutions. Assessment burden for children and families should also be taken into consideration  
21 when selecting an assessment tool. Younger children are more likely to be distracted and may not  
22 understand test items as well, which may also increase assessment times<sup>27</sup>.

23 When a new edition of an assessment tool is released resulting in a change in age groups, scoring  
24 or tasks it is insufficient to rely on the psychometric assessments that were performed on the  
25 original test. The MABC-2 manual provides justification for the inclusion of reliability and validity  
26 assessment of the original MABC<sup>14</sup>, however, owing to the significant changes in age groups and  
27 tasks between editions these were not included for the analysis of the MABC-2 in this review. Two  
28 studies quoted in the MABC-2 manual to support the validity and reliability are both unpublished  
29 works and as such are also unable to be included in this systematic review. This could indicate a  
30 publication bias for the MABC-2.

1 As yet there is little evidence to support the use of these assessments as outcome measures. The  
2 TGMD-2 was created in part to be used as an outcome measure, however there are no articles to  
3 date investigating its responsiveness to change<sup>19</sup>. The inclusion in some of the articles of minimal  
4 detectable change (MDC) and minimal clinically important difference (MCID) is valuable for  
5 clinicians. The difference between the two values is also of importance, as a change in score does  
6 not necessarily relate to a meaningful change for the child or their family. It should also be noted  
7 that all of the included assessment tools measure impairment and activity limitations, but do not  
8 specifically address the other elements of the International Classification of Functioning, Disability  
9 and Health (ICF) domains of participation, personal factors and environment<sup>2</sup>. Clinicians should  
10 utilise appropriate assessments or questionnaires to ensure that these domains of health are also  
11 addressed in line with World Health Organisation guidelines<sup>2</sup>.

12 When considering a test's reliability all three elements of test error should be taken into account –  
13 these can be described as time sampling (assessed with test-retest reliability), content sampling  
14 (assessed as internal consistency), and inter-scorer difference (or interrater reliability)<sup>19</sup>. This is one  
15 of the reasons that clinicians should consider repeating assessments and/or completing a second  
16 alternative assessment. All assessments should be interpreted in conjunction with clinical reasoning  
17 and observation. Included assessment tools are not intended to be diagnostic on their own; results  
18 need to be combined with other assessments and expert opinion to arrive at a clinical diagnosis.

19 In this review lower methodological scores on the COSMIN can be attributed to inadequate  
20 reporting statistical methods, small sample sizes and non-independent assessors. Further research  
21 in this area should consider addressing these limitations in their study design to reduce potential  
22 error.

23 The thorough methodological assessment of the included articles using the COSMIN checklist  
24 should be seen as a strength of this paper, as should the range of assessment tools included in this  
25 review. While it has previously been argued that the 'worst score counts' criteria in the COSMIN  
26 creates a floor effect<sup>51</sup>, the COSMIN authors argue that only 'fatal flaws' contribute to an overall  
27 score of poor<sup>10</sup>. There are few tools available to assess the psychometric properties of assessment  
28 tools and arguably none so robustly validated as the COSMIN.

29 There are many appropriate gross motor assessment tools available for use in research and clinical  
30 settings today. The available tools demonstrate adequate validity and reliability and as such the  
31 authors do not believe that new assessment tools need to be developed for use. There is scope

1 however to improve the evidence of inter and intrarater reliability and predictive validity should be  
2 ascertained over a longer period of time and with greater methodological rigour. Tools also need  
3 clearer assessment of their responsiveness to change to assist clinicians and researchers with  
4 outcome measure selection. Researchers should be mindful of the methods they use to assess  
5 validity and reliability. Clarity of reporting, statistical methods and sample sizes should be carefully  
6 considered to ensure the highest quality of evidence.

## 7 Conclusion

8 Currently available motor assessment tools have good to excellent content and construct validity.  
9 The BOT-2, MABC-2, PDMS-2 and TGMD-2 are the most reliable assessments in this age group. The  
10 Bayley-III has the best predictive validity at 2 years of age, and the NSMDA and the MABC-2 both  
11 have good predictive validity at 4 years of age. There is scope for further research into the  
12 predictive validity, reliability and responsiveness of gross motor assessment tools in preschool and  
13 school aged children. In practice clinicians should choose assessments with consideration of their  
14 psychometric properties in the context of the child that they are assessing.

## 16 Author Contributions

17 All individuals listed as authors meet the appropriate authorship criteria and have approved the  
18 acknowledgement of their contributions. AG was responsible for the drafting of the paper and  
19 liaising with the co-authors on findings and conclusions. RT contributed to the paper through  
20 interpretation of data, completing methodological assessments and revising the content throughout  
21 its development. A/Profs PEM and AJS both contributed to the paper through assisting with the  
22 development of research design, interpretation of data and revising the content through its  
23 development.

## Figures

Figure 1. PRISMA flow diagram detailing study selection

Figure 2. Test re-test reliability of gross motor assessment tools

Figure 2 legend: BOT-2, Bruininks-Oseretsky Test of Motor Proficiency 2<sup>nd</sup> edition <sup>13</sup>; MABC-2, Movement Assessment Battery for Children 2<sup>nd</sup> edition <sup>14</sup>; PDMS-2, Peabody Developmental Motor Scales 2<sup>nd</sup> edition <sup>17</sup>; TGMD-II, Test of Gross Motor Development 2<sup>nd</sup> edition <sup>19</sup>.

Figure 3. Inter and interrater reliability of gross motor assessment tools

Figure 3 legend: MABC-2, Movement Assessment Battery for Children 2<sup>nd</sup> edition <sup>14</sup>; TGMD-II, Test of Gross Motor Development 2<sup>nd</sup> edition <sup>19</sup>

## References

1. Piek JP, Baynam GB, Barrett NC. The relationship between fine and gross motor ability, self-perceptions and self-worth in children and adolescents. *Hum Mov Sci* 2006;25(1):65-75. doi: <http://dx.doi.org/10.1016/j.humov.2005.10.011>
2. World Health Organization. International Classification of Functioning, Disability and Health: ICF: World Health Organization 2001.
3. Magalhaes LC, Cardoso AA, Missiuna C. Activities and participation in children with developmental coordination disorder: a systematic review. *Res Dev Disabil* 2011;32(4):1309-16. doi: 10.1016/j.ridd.2011.01.029 [published Online First: 2011/02/19]
4. Spittle AJ, Spencer-Smith MM, Eeles AL, et al. Does the Bayley-III Motor Scale at 2 years predict motor outcome at 4 years in very preterm children? *Developmental Medicine And Child Neurology* 2013;55(5):448-52. doi: 10.1111/dmcn.12049
5. Logan SW, Robinson LE, Getchell N. The Comparison of Performances of Preschool Children on Two Motor Assessments. *Perceptual and Motor Skills* 2011;113(3):715-23.
6. Venetsanou F, Kambas A. Environmental factors affecting preschoolers' motor development. *Early Childhood Education Journal* 2010;37(4):319-27.
7. Mokkink LB, Terwee CB, Patrick DL, et al. The COSMIN study reached international consensus on taxonomy, terminology, and definitions of measurement properties for health-related patient-reported outcomes. *J Clin Epidemiol* 2010;63(7):737-45. doi: 10.1016/j.jclinepi.2010.02.006 [published Online First: 2010/05/25]
8. Slater LM, Hillier SL, Civetta LR. The clinimetric properties of performance-based gross motor tests used for children with developmental coordination disorder: A systematic review. *Pediatr* 2010;22(2):170.
9. Brown T, Lalor A. The Movement Assessment Battery for Children—Second Edition (MABC-2): A Review and Critique. *Phys Occup Ther Pediatr* 2009;29(1):86-103.
10. Terwee CB, Mokkink LB, Knol DL, et al. Rating the methodological quality in systematic reviews of studies on measurement properties: a scoring system for the COSMIN checklist. *Qual Life Res* 2012;21(4):651-7. doi: 10.1007/s11136-011-9960-1 [published Online First: 2011/07/07]
11. Law M. Outcome measures rating form. Ontario, Canada: CanChild Centre for Disability Research, 2004.
12. Bayley N. Bayley Scales of Infant Development and Toddler Development: Technical Manual: The PsychCorp 2006.
13. Bruininks R, Bruininks B. Bruininks-Oseretsky Test of Motor Proficiency—2nd Edition (BOT-2): Manual. Circle Pines: MN: AGS Publishing 2005.
14. Henderson SE, Sugden DA, Barnett AL. Movement assessment battery for children-2: Movement ABC-2: Examiner's manual: Pearson 2007.

15. McCarron LT. MAND: McCarron assessment of neuromuscular development, fine and gross motor abilities: McCarron-Dial Systems, Incorporated 1997.
16. Burns YR. N.S.M.D.A Physiotherapy Assessment for Infants and Young Children Second Edition. Brisbane, Queensland: CopyRight Publishing Company 2014.
17. Folio M, Fewell R. Peabody Developmental Motor Scales. Examiner's Manual . 2nd Edition. Austin, Texas.: Pro-Ed. 2000.
18. Khan NZ, Muslima H, El Arifeen S, et al. Validation of a rapid neurodevelopmental assessment tool for 5 to 9 year-old children in Bangladesh. *J Pediatr* 2014;164(5):1165-70.e6. doi: <http://dx.doi.org/10.1016/j.jpeds.2013.12.037>
19. Ulrich DA. Test of gross motor development-2. *Austin: Prod-Ed* 2000
20. Hua J, Gu G, Meng W, et al. Age band 1 of the Movement Assessment Battery for Children-Second Edition: exploring its usefulness in mainland China. *Res Dev Disabil* 2013;34(2):801-8. doi: <http://dx.doi.org/10.1016/j.ridd.2012.10.012>
21. Niemeijer AS, van Waelvelde H, Smits-Engelsman BC. Crossing the North Sea seems to make DCD disappear: cross-validation of Movement Assessment Battery for Children-2 norms. *Hum Mov Sci* 2015;39:177-88. doi: 10.1016/j.humov.2014.11.004
22. Khan NZ, Muslima H, Shilpi AB, et al. Validation of rapid neurodevelopmental assessment for 2- to 5-year-old children in Bangladesh. *Pediatrics* 2013;131(2):e486-94. doi: <http://dx.doi.org/10.1542/peds.2011-2421>
23. Visser L, Ruiters SAJ, Van der Meulen BF, et al. Low verbal assessment with the Bayley-III. *Res Dev Disabil* 2015;36:230-43.
24. Wuang YP, Su CY. Reliability and responsiveness of the Bruininks-Oseretsky Test of Motor Proficiency-Second Edition in children with intellectual disability. *Res Dev Disabil* 2009;30(5):847-55. doi: <http://dx.doi.org/10.1016/j.ridd.2008.12.002>
25. Wuang YP, Su CY, Huang MH. Psychometric comparisons of three measures for assessing motor functions in preschoolers with intellectual disabilities. *J Intellect Disabil Res* 2012;56(6):567-78. doi: <http://dx.doi.org/10.1111/j.1365-2788.2011.01491.x>
26. Ellinoudis T, Evaggelina C, Kourtessis T, et al. Reliability and validity of age band 1 of the Movement Assessment Battery for Children--second edition. *Res Dev Disabil* 2011;32(3):1046-51. doi: <http://dx.doi.org/10.1016/j.ridd.2011.01.035>
27. Smits-Engelsman BCM, Niemeijer AS, van Waelvelde H. Is the Movement Assessment Battery for Children-2nd edition a reliable instrument to measure motor performance in 3 year old children? *Res Dev Disabil* 2011;32(4):1370-77. doi: <http://dx.doi.org/10.1016/j.ridd.2011.01.031>
28. Holm I, Tveter AT, Aulie VS, et al. High intra- and inter-rater chance variation of the movement assessment battery for children 2, ageband 2. *Res Dev Disabil* 2013;34(2):795-800. doi: <http://dx.doi.org/10.1016/j.ridd.2012.11.002>
29. Kita Y, Suzuki K, Hirata S, et al. Applicability of the Movement Assessment Battery for Children-Second Edition to Japanese children: A study of the Age Band 2. *Brain Dev* 2016;38(8):706-13.



- 1  
2  
3  
4  
5  
6  
7  
8  
9  
10  
11  
12  
13  
14  
15  
16  
17  
18  
19  
20  
21  
22  
23  
24  
25  
26  
27  
28  
29  
30  
31  
32  
33  
34  
35  
36  
37  
38  
39  
40  
41  
42  
43  
44  
45  
46  
47  
48  
49  
50  
51  
52  
53  
54  
55  
56  
57  
58  
59  
60
30. Griffiths A, Morgan P, Anderson PJ, et al. Predictive value of the Movement Assessment Battery for Children - Second Edition at 4 years, for motor impairment at 8 years in children born preterm. *Dev Med Child Neurol* 2017;59(5):490-96. doi: 10.1111/dmcn.13367 [published Online First: 2017/01/10]
31. Schulz J, Henderson SE, Sugden DA, et al. Structural validity of the Movement ABC-2 test: factor structure comparisons across three age groups. *Res Dev Disabil* 2011;32(4):1361-9. doi: <http://dx.doi.org/10.1016/j.ridd.2011.01.032>
32. Valentini NC, Ramalho MH, Oliveira MA. Movement assessment battery for children-2: translation, reliability, and validity for Brazilian children. *Res Dev Disabil* 2014;35(3):733-40. doi: <http://dx.doi.org/10.1016/j.ridd.2013.10.028>
33. Wuang YP, Su JH, Su CY. Reliability and responsiveness of the Movement Assessment Battery for Children-Second Edition Test in children with developmental coordination disorder. *Dev Med Child Neurol* 2012;54(2):160-5. doi: <http://dx.doi.org/10.1111/j.1469-8749.2011.04177.x>
34. Hands B, Larkin D, Rose E. The psychometric properties of the McCarron Assessment of Neuromuscular Development as a longitudinal measure with Australian youth. *Hum Mov Sci* 2013;32(3):485-97. doi: <http://dx.doi.org/10.1016/j.humov.2013.02.007>
35. Danks M, Maideen MF, Burns YR, et al. The long-term predictive validity of early motor development in "apparently normal" ELBW survivors. *Early Hum Dev* 2012;88(8):637-41.
36. MacDonald J, Burns Y. Performance on the NSMDA During the First and Second Year of Life to Predict Functional Ability at the Age Of 4 in Children with Cerebral Palsy. *Hong Kong Physiotherapy Journal* 2005;23(1):40-45. doi: 10.1016/S1013-7025(09)70058-2
37. Burns YR, Ensbeys RM, Norrie MA. The Neuro-sensory motor developmental assessment part 1: development and administration of the test. *Aust J Physiother* 1989;35(3):141-49.
38. Burns YR, Ensbeys RM, Norrie MA. The neuro-sensory motor developmental assessment part II: predictive and concurrent validity. *Aust J Physiother* 1989;35(3):151-57.
39. Barnett LM, Minto C, Lander N, et al. Interrater reliability assessment using the Test of Gross Motor Development-2. *Journal of Science and Medicine in Sport* 2014;17(6):667-70. doi: <http://dx.doi.org/10.1016/j.jsams.2013.09.013>
40. Farrokhi A, Zareh Zadeh M, Karimi Alvar L, et al. Reliability and validity of test of gross motor development-2 (Ulrich, 2000) among 3-10 aged children of Tehran City. *Journal of Physical Education and Sports Management* 2014;5(2):18-28. doi: 10.5897/JPEM12.003
41. Houwen S, Hartman E, Jonker L, et al. Reliability and validity of the TGMD-2 in primary-school-age children with visual impairments. *Adapt Phys Act Q* 2010;27(2):143-59.
42. Kim Y, Park I, Kang M. Examining rater effects of the TGMD-2 on children with intellectual disability. *Adapt Phys Act Q* 2012;29(4):346-65.
43. Kim CI, Han DW, Park IH. Reliability and validity of the test of gross motor development-II in Korean preschool children: applying AHP. *Res Dev Disabil* 2014;35(4):800-7. doi: <http://dx.doi.org/10.1016/j.ridd.2014.01.019>

- 1  
2  
3  
4  
5  
6  
7  
8  
9  
10  
11  
12  
13  
14  
15  
16  
17  
18  
19  
20  
21  
22  
23  
24  
25  
26  
27  
28  
29  
30  
31  
32  
33  
34  
35  
36  
37  
38  
39  
40  
41  
42  
43  
44  
45  
46  
47  
48  
49  
50  
51  
52  
53  
54  
55  
56  
57  
58  
59  
60
44. Rudd J, Butson ML, Barnett L, et al. A holistic measurement model of movement competency in children. *J Sports Sci* 2016;34(5):477-85.
45. Simons J, Daly D, Theodorou F, et al. Validity and reliability of the TGMD-2 in 7-10-year-old Flemish children with intellectual disability. *Adapted physical activity quarterly : APAQ* 2008;25(1):71-82.
46. Valentini NC. Validity and reliability of the TGMD-2 for Brazilian children. *J Mot Behav* 2012;44(4):275-80. doi: <http://dx.doi.org/10.1080/00222895.2012.700967>
47. Wong KYA, Yin Cheung S. Confirmatory factor analysis of the Test of Gross Motor Development-2. *Measurement in Physical Education & Exercise Science* 2010;14(3):202-09. doi: 10.1080/10913671003726968
48. Wuang YP, Lin YH, Su CY. Rasch analysis of the Bruininks-Oseretsky Test of Motor Proficiency-Second Edition in intellectual disabilities. *Res Dev Disabil* 2009;30(6):1132-44. doi: <http://dx.doi.org/10.1016/j.ridd.2009.03.003>
49. Spittle AJ, Doyle LW, Boyd RN. A systematic review of the clinimetric properties of neuromotor assessments for preterm infants during the first year of life. *Dev Med Child Neurol* 2008;50(4):254-66. doi: 10.1111/j.1469-8749.2008.02025.x [published Online First: 2008/01/15]
50. McDowell I. Measuring health: a guide to rating scales and questionnaires: Oxford university press 2006.
51. Adair B, Said CM, Rodda J, et al. Psychometric properties of functional mobility tools in hereditary spastic paraplegia and other childhood neurological conditions. *Dev Med Child Neurol* 2012;54(7):596-605.

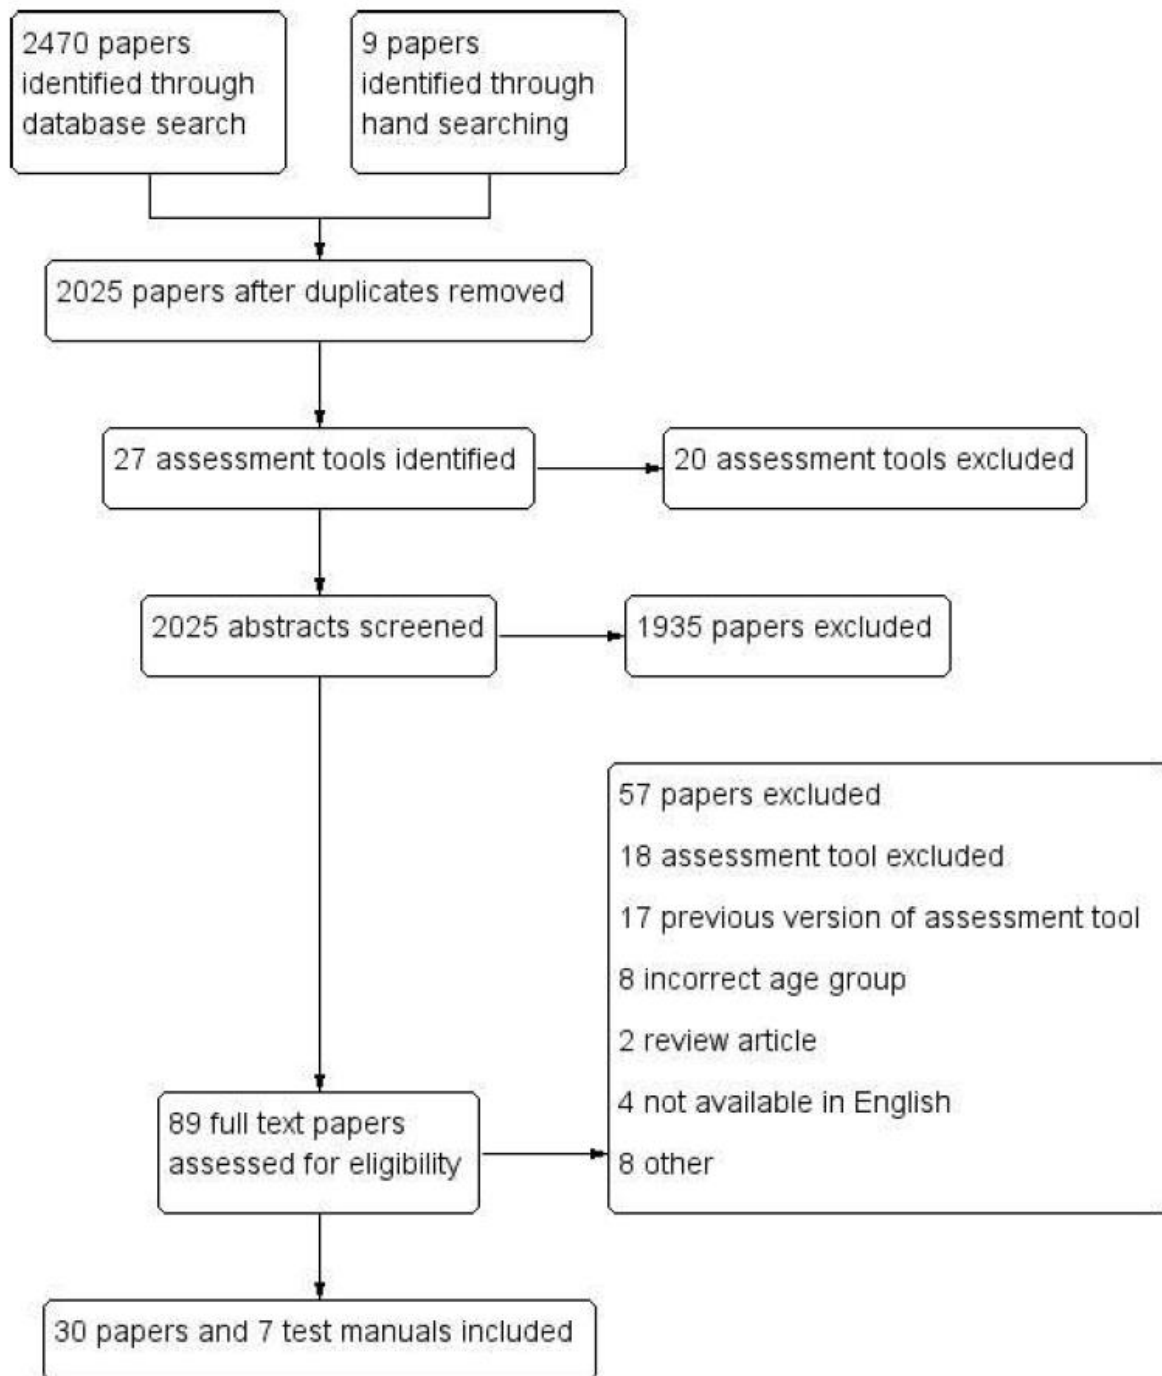

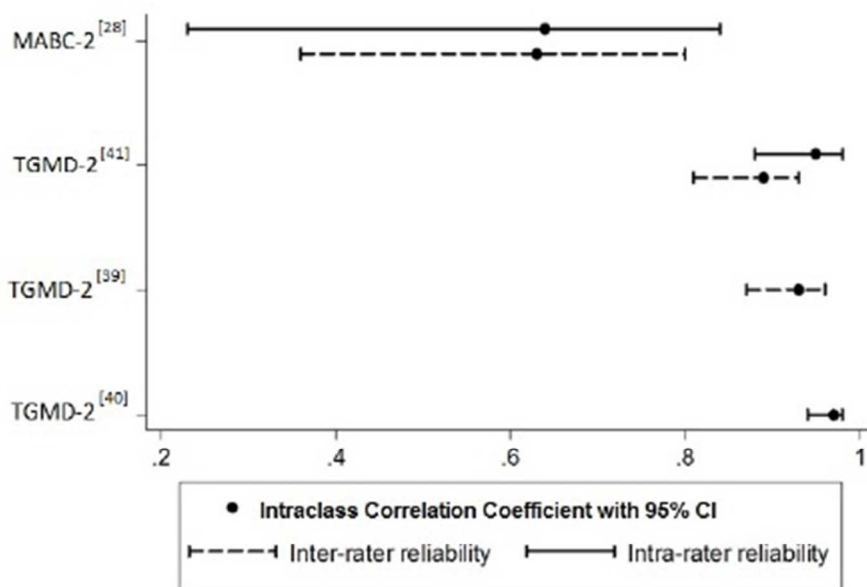

Figure 2. Test re-test reliability of gross motor assessment tools  
 Figure 2 legend: BOT-2, Bruininks-Oseretsky Test of Motor Proficiency 2nd edition 13; MABC-2, Movement Assessment Battery for Children 2nd edition 14; PDMS-2, Peabody Developmental Motor Scales 2nd edition 17; TGMD-II, Test of Gross Motor Development 2nd edition 19.

41x28mm (300 x 300 DPI)

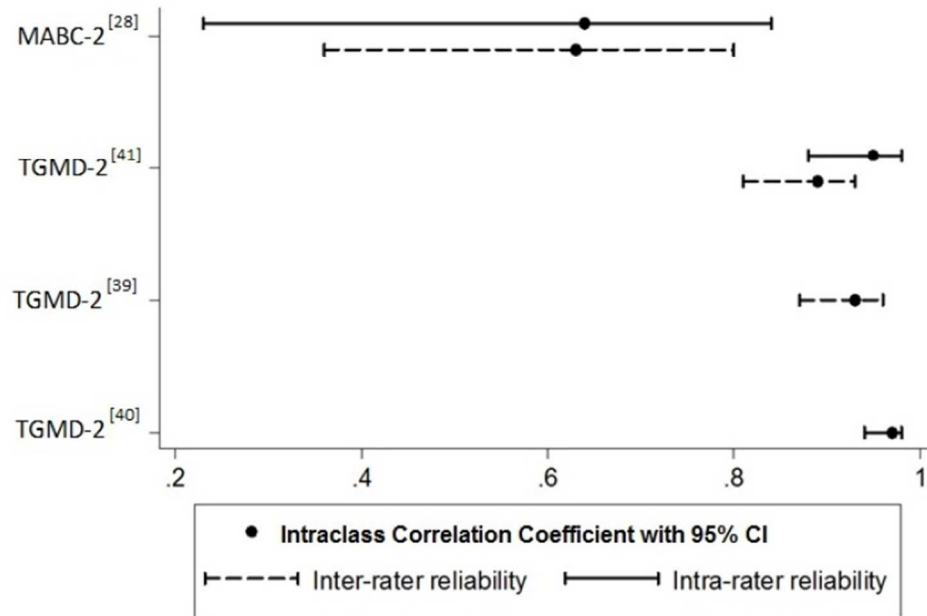

Figure 3. Inter and interrater reliability of gross motor assessment tools  
 Figure 3 legend: MABC-2, Movement Assessment Battery for Children 2nd edition 14; TGMD-II, Test of Gross Motor Development 2nd edition 19

67x48mm (300 x 300 DPI)

Supplementary table 1: Definition of terms

|                    |                      | <b>Definition</b>                                                                                                                                           | <b>Example/explanation</b>                                                                                                                                                                                                                                                                                                                                         |
|--------------------|----------------------|-------------------------------------------------------------------------------------------------------------------------------------------------------------|--------------------------------------------------------------------------------------------------------------------------------------------------------------------------------------------------------------------------------------------------------------------------------------------------------------------------------------------------------------------|
| <b>Validity</b>    | Content              | The degree to which an assessment tool's content measures the construct that it intends to measure [7]                                                      | Concerned with the relevance and comprehensiveness of the items included in the assessment tool                                                                                                                                                                                                                                                                    |
|                    | Construct            | Measures the degree to which the scores obtained from the test are an adequate reflection of the construct to be measured [7]                               | Examples include structural validity, hypothesis testing and cross-cultural validity                                                                                                                                                                                                                                                                               |
|                    | Criterion            | Assesses whether or not the test scores reflect a 'gold standard' assessment [7]                                                                            | As there is no gold standard of assessment for gross motor function in children this is often assessed with correlations of scores obtained from two or three other frequently used tools.                                                                                                                                                                         |
| <b>Reliability</b> |                      | Refers to the consistency of a test score regardless of the time between assessments (test-retest) or the person administering (intra and inter-rater) [27] | Usually measured with intraclass correlation coefficient (ICC), but can be measured using Cohen's kappa coefficient. Percentage agreement and Pearson's correlation coefficient do not incorporate error into the calculations and as such is not a true measure of agreement [27]. Scores > 0.80 are considered excellent, 0.60-0.79 adequate and <0.59 poor [12] |
|                    | Internal consistency | The degree of interrelatedness of an assessment tool's items [7]                                                                                            | Usually measured using Cronbach's alpha ( $\alpha$ ) [7]. scores > 0.70 demonstrates high relationship, 0.5 to 0.69 a moderate relationship, 0.26 to 0.49 a low relationship and < 0.26                                                                                                                                                                            |

little relationship [27].

|                       |                                                                                                             |                                                                       |
|-----------------------|-------------------------------------------------------------------------------------------------------------|-----------------------------------------------------------------------|
| Measurement Error     | Refers to the error obtained between measurements that cannot be attributed to the patients true change [7] | May be systematic or random error [7]                                 |
| <b>Responsiveness</b> | An assessment tool's ability to detect change over time in the construct to be measured [7]                 | This is central to a tools capacity to be used as an outcome measure. |

---

### Supplementary table 2: Excluded Assessment Tools

| Reason                                      | Assessments                                                                                                                                                                                                                         |
|---------------------------------------------|-------------------------------------------------------------------------------------------------------------------------------------------------------------------------------------------------------------------------------------|
| Manual not available in English             | Maastricht's Motor Test (MMT)<br>The Motor-Proficiency-Test for children between 4 and 6 years of age (MOT 4-6)<br>Zuk Assessment<br>Körperkoordinationstest für Kinder (KTK)                                                       |
| Cannot extract meaningful gross motor score | Early Intervention Developmental Profile (EIDP)<br>Neurological Developmental Exam<br>Preschooler Gross Motor Quality Scale (PGMQ)<br>The Malawi Developmental Assessment Tool (MDAT)<br>Dutch table tennis motor skills assessment |
| Screening Tool                              | Brief Assessment of Motor Function (BAMF)<br>The Motor Performance Checklist<br>Motor skill checklist (MSC)                                                                                                                         |
| Diagnosis specific/requires a diagnosis     | Assessment Battery for the Atypical Handicapped Child (VAB)<br>Video-based documentation and rating system of the motor behaviour of handicapped children                                                                           |
| Only assesses one motor domain (e.g. gait)  | Standardized Walking Obstacle Course (SWOC)<br>Timed floor to stand test                                                                                                                                                            |
| Manual not published/commercially available | Rapid Neurodevelopmental Assessment (RNDA)<br>Tufts Assessment of Motor Performance (TAMP)<br>Zurich Neuromotor Assessment (ZNA)                                                                                                    |

---

Supplementary table 3: Scoring and administration of assessment tools

| Assessment Tool        | Scoring                                                                                                                                                    | Interpretation of scores                                                                                                           | Other                                                                                                            |
|------------------------|------------------------------------------------------------------------------------------------------------------------------------------------------------|------------------------------------------------------------------------------------------------------------------------------------|------------------------------------------------------------------------------------------------------------------|
| <b>Bayley-III [28]</b> | Motor score - gross (varying items) and fine motor (varying items) subscales. Binary score with reverse/discontinue rules                                  | Raw scores Composite scores Centile ranks Age equivalents Growth scores                                                            | Lends itself to multidisciplinary team testing.                                                                  |
| <b>BOT-2 [13]</b>      | Fine manual (15 items) manual coordination (12 items) body coordination (16 items) strength and agility (10 items) subscales. Scoring differs for subtests | Raw scores Age adjusted standard scores Composite scores Centile ranks Age equivalents Descriptive categories. Complex conversions | Administration Easel includes instructions, diagrams and photos of test procedure                                |
| <b>MABC-2[24]</b>      | Manual dexterity (3 items), aiming & catching (2 items) and balance (3 items) subscales.                                                                   | Raw scores component scores centile ranks total test score traffic light system. Simple conversion                                 | Also Available: MABC-2 Checklist (screening tool) and intervention manual                                        |
| <b>MAND [29]</b>       | Fine motor (5 items) Gross motor (5 items)                                                                                                                 | Raw scores Scaled scores converted to an NDI. Factor scores. Complex conversions                                                   | Case studies included in manual for hyperactivity, encephalitis, mild head trauma, CP and muscular dystrophy     |
| <b>NSMDA [30]</b>      | Functional grade given for each subscale, which is combined to create an overall score.                                                                    | Indicates: normal range, minimal dysfunction, mild problems, moderate, severe or profound disability                               | Sections for comment on strengths, behavioural state during testing, musculoskeletal system and recommendations. |



1  
2  
3  
4  
5  
6  
7  
8  
9  
10  
11  
12  
13  
14  
15  
16  
17  
18  
19  
20  
21  
22  
23  
24  
25  
26  
27  
28  
29  
30  
31  
32  
33  
34  
35  
36  
37  
38  
39  
40  
41  
42  
43  
44  
45  
46  
47

|                                                                                                                                                                                                                                                                                                                                                                                                                                                                                                                                                                                                          |                                                                                                                                               |                                                                                                               |                                               |
|----------------------------------------------------------------------------------------------------------------------------------------------------------------------------------------------------------------------------------------------------------------------------------------------------------------------------------------------------------------------------------------------------------------------------------------------------------------------------------------------------------------------------------------------------------------------------------------------------------|-----------------------------------------------------------------------------------------------------------------------------------------------|---------------------------------------------------------------------------------------------------------------|-----------------------------------------------|
| <b>PDMS-2 [31]</b>                                                                                                                                                                                                                                                                                                                                                                                                                                                                                                                                                                                       | GM: Stationary (30 items), locomotion (89 items), object manipulation (24 item). FM: grasping(26 items) , visual-motor integration (72 items) | Raw scores, Age equivalent, centile rank. Standard scores (subtests) Composite quotient. Complex conversions. | Motor activities program (intervention ideas) |
| <b>TGMD-2 [25]</b>                                                                                                                                                                                                                                                                                                                                                                                                                                                                                                                                                                                       | Locomotion (6 items) and Object Control (6 items). Separate male/female norms for object control subset                                       | Raw scores, standard scores, percentile rank, age equivalent, Gross Motor Quotient. Simple conversion.        | Simple to administer                          |
| Bayley-III, Bayley Scale of Infant and Toddler Development 3 <sup>rd</sup> edition [28]; BOT-2, Bruininks-Oseretsky Test of Motor Proficiency 2 <sup>nd</sup> edition [13]; MABC-2, Movement Assessment Battery for Children 2 <sup>nd</sup> edition [24]; MAND, McCarron Assessment of Neuromuscular Development [29]; NSMDA, Neurological Sensory Motor Developmental Assessment [30]; PDMS-2, Peabody Developmental Motor Scales 2 <sup>nd</sup> edition [31];; TGMD-II, Test of Gross Motor Development 2 <sup>nd</sup> edition [25]; GM, Gross Motor; FM, Fine Motor; NDI, Neurodevelopmental Index |                                                                                                                                               |                                                                                                               |                                               |

Supplementary table 4: Content and construct validity of assessment tools

| Test              | Content                                                                                                                                                                                                    | Construct                                                                                                                                                                                                                                                                                                                                                                                                                                                                                                                                                                                                                             |
|-------------------|------------------------------------------------------------------------------------------------------------------------------------------------------------------------------------------------------------|---------------------------------------------------------------------------------------------------------------------------------------------------------------------------------------------------------------------------------------------------------------------------------------------------------------------------------------------------------------------------------------------------------------------------------------------------------------------------------------------------------------------------------------------------------------------------------------------------------------------------------------|
| <b>BAYLEY III</b> | Expert opinion for standard and low verbal version [28, 34].<br>Literature reviews. Gross motor score correlated with Motor component 0.70 [28]                                                            | Factor analysis. Difference in mean scores with pervasive developmental disorder, and specific language impairment [28]. $H_i$ (gross motor subset) = 0.52-0.97 for children with language impairment and 0.82-0.99 in control group [34]                                                                                                                                                                                                                                                                                                                                                                                             |
| <b>BOT-2</b>      | Focus groups, product survey, pilot, national tryout and standardisation studies, professional reviews[13]                                                                                                 | Factor analysis, scores increase with age, discriminates between normal and children with DCD ( $N=50$ ), high-functioning ASD ( $N = 45$ ) and mild-moderate ID ( $N = 66$ ) [13]                                                                                                                                                                                                                                                                                                                                                                                                                                                    |
| <b>MABC-2</b>     | Expert Panel, Stakeholder feedback, Literature review [18]<br><br>Expert panel - clarity (validity content index 71.8-93.9, Kappa 0.76-0.88) and pertinence (98.5-99.3 and kappa 0.83-0.92) $p<0.001$ [40] | Factor analysis, correlation coefficients [36] Subtest correlations 0.65-0.76 $p<0.001$ . Discriminates between ASD and control group [18]. Structural equation modelling (for each age group) [39]. Expert panel - adequate face validity [40]. Significant difference between TD, DCD and at risk DCD scores ( $\eta^2 = 0.63$ ) $p< 0.0001$ [40]. UK norms not appropriate to use with Dutch/Flemish children as under/over-estimate risk of motor impairment [15]. In Chinese population: CFA initially rejected. Acceptable fit achieved after 2 items removed [14]. Age band 2 shows good validity in Japanese population [37]. |
| <b>MAND</b>       | Based on neuropsychological theory. Several rounds of revision/trials of tasks during development [29]                                                                                                     | Factor analysis [29] [42]. Scores increase with age, and discriminate between typically developing children and those with head trauma or neurological dysfunction as well as gender [29] [42]                                                                                                                                                                                                                                                                                                                                                                                                                                        |
| <b>NSMDA</b>      | Literature review. Developed by an experienced paediatric physiotherapist [45]                                                                                                                             | Factor analysis (up to 2 years of age) [45] [46]. Stability of test results over time (up to 2 years) [45] [46].                                                                                                                                                                                                                                                                                                                                                                                                                                                                                                                      |
| <b>PDMS-2</b>     | Literature review. Created by experts in the field. Revised with feedback from therapists guided revision. Hierarchical sequence                                                                           | Item response modelling. Factor analysis. Differential item functioning analysis. Scores correlated with age ( $r=0.80-0.93$ ) [31]                                                                                                                                                                                                                                                                                                                                                                                                                                                                                                   |

1  
2  
3  
4  
5  
6  
7  
8  
9  
10  
11  
12  
13  
14  
15  
16  
17  
18  
19  
20  
21  
22  
23  
24  
25  
26  
27  
28  
29  
30  
31  
32  
33  
34  
35  
36  
37  
38  
39  
40  
41  
42  
43  
44  
45  
46  
47

of items [31]

|               |                                                                                                                                                                                                                                                                          |                                                                                                                                                                                                                                                                                                                                                                                                                                                                                                                                               |
|---------------|--------------------------------------------------------------------------------------------------------------------------------------------------------------------------------------------------------------------------------------------------------------------------|-----------------------------------------------------------------------------------------------------------------------------------------------------------------------------------------------------------------------------------------------------------------------------------------------------------------------------------------------------------------------------------------------------------------------------------------------------------------------------------------------------------------------------------------------|
| <b>TGMD-2</b> | Expert Panel (3 PE teachers with post-grad qualifications) [25]. Translated version (Brazilian Portuguese) language clarity 0.96, pertinence >0.89. Experts CVI for clarity and pertinence were also strong- $\alpha = 0.93$ clarity and $\alpha = 0.91$ pertinence [52] | Exploratory and confirmatory factor analysis [50] [52] [25] [22] [53] [51] High and significant correlation of increasing age and increasing scores [47]. Age and disability differentiation [25] [51] Subtest correlation 0.41 [25]<br><br>Gallop, running and leaping not well correlated with locomotion subscale. Object control significant & highly correlated [49]. ANOVA - significant age effect for object control [51]<br><br>Moderate correlation between items and subset scores, and between subset scores and total score [51] |
|---------------|--------------------------------------------------------------------------------------------------------------------------------------------------------------------------------------------------------------------------------------------------------------------------|-----------------------------------------------------------------------------------------------------------------------------------------------------------------------------------------------------------------------------------------------------------------------------------------------------------------------------------------------------------------------------------------------------------------------------------------------------------------------------------------------------------------------------------------------|

Bayley-III, Bayley Scale of Infant and Toddler Development 3<sup>rd</sup> edition;[28] BOT-2, Bruininks-Oseretsky Test of Motor Proficiency 2<sup>nd</sup> edition;[13] MABC-2, Movement Assessment Battery for Children 2<sup>nd</sup> edition;[24] MAND, McCarron Assessment of Neuromuscular Development;[29] NSMDA, Neurological Sensory Motor Developmental Assessment;[30] PDMS-2, Peabody Developmental Motor Scales 2<sup>nd</sup> edition;[31] TGMD-II, Test of Gross Motor Development 2<sup>nd</sup> edition;[25]; H<sub>i</sub>, scalability coefficient; CFA, Confirmatory Factor Analysis; TD, Typically Developing; ASD, Autism Spectrum Disorder, ID, Intellectual Disability; WPPSI, *Wechsler Preschool and Primary Scale of Intelligence*; WISC-R, Wechsler Preschool and Primary Scale of Intelligence-R; NDI, Neurodevelopmental Index; ANOVA, Analysis of Variance

Supplementary table 5: Criterion and predictive validity of assessment tools

| Test              | Concurrent/criterion                                                  | Predictive                                                                                                                                    |
|-------------------|-----------------------------------------------------------------------|-----------------------------------------------------------------------------------------------------------------------------------------------|
| <b>BAYLEY III</b> | Given but mean age <22 months. Not relevant to study population. [28] | Motor impairment at 4 years: Bayley III at 2 years <1SD = sensitivity 0.32-.037 specificity 0.97 <2SD sensitivity 0.18-0.21 specificity 1.00. |

6

|               |                                                                                                                                                                                                                                            |                                                                                                                                                                                                                                                                                                                                                      |
|---------------|--------------------------------------------------------------------------------------------------------------------------------------------------------------------------------------------------------------------------------------------|------------------------------------------------------------------------------------------------------------------------------------------------------------------------------------------------------------------------------------------------------------------------------------------------------------------------------------------------------|
|               |                                                                                                                                                                                                                                            | CP at 4 years: Bayley III at 2 years <1SD sensitivity 0.83 specificity 0.94. <2SD sensitivity 0.67 specificity 1.0 [4]                                                                                                                                                                                                                               |
| <b>BOT-2</b>  | MABC-2 $\rho = 0.92$ PDMS-2 $\rho = 0.88$ ( $N = 38$ ) [17]. PDMS-2 Total motor composite $r = 0.77$ [13].                                                                                                                                 | -                                                                                                                                                                                                                                                                                                                                                    |
| <b>MABC-2</b> | PDMS-2 $\rho = 0.631 - 0.84$ [17] [14]. TGMD-2 $\rho = 0.45$ [5]. TGMD-2 standard scores ( $r = 0.3, p < 0.02$ ) [40]. BOT-2 $\rho = 0.90 - 0.92$ [17].                                                                                    | Classification groups (DCD, at risk and TD) remained same over time (6 months) $\chi^2 = 0.67 p = 0.72$ [40]. Predictive of motor impairment over 6-12 months ( $N=41$ ) ICC 0.88 $p < 0.007$ [40]. Scores at 4 years predictive of motor impairment at 8 years in children born <30 weeks gestation (PPV 79, sensitivity 79%, specificity 93%) [38] |
| <b>MAND</b>   | Gross motor subscore: Low-moderate correlation with manual dexterity (-0.46 to 0.35), reaction time (-0.31 to -0.58), intelligence measures (WISC-R, Metropolitan Achievement Test) (0.30-0.39) and visual motor test (-0.33 to 0.39) [29] | -                                                                                                                                                                                                                                                                                                                                                    |
| <b>NSMDA</b>  | NSMDA at 2 years ( $N = 148$ ) predictive of medical diagnosis $\chi^2 = 0.08 p = NS$ [46]                                                                                                                                                 | Motor outcome at 11-13 yrs. NSMDA at 2years - sensitivity 48.8%, specificity 82.4%, NSMDA at 4 years sensitivity 64.5%, and specificity 80%. PPV at 2 years 83% at 4 years 87% [43]. If classified 'severe' at 24 months - approximately 50% chance walking at 4 years (moderate = 80%, mild = 93% minimal = 100%) [44]                              |
| <b>PDMS-2</b> | MABC-2 $\rho = 0.63- 0.84$ , [14, 17] MABC-2 gross motor composite $\rho = 0.743$ [14]<br><br>BOT-2 $\rho = 0.88$ [17]. Mullen Scales of Early Learning GMQ = 0.86 FMQ = 0.80 [31]                                                         | -                                                                                                                                                                                                                                                                                                                                                    |

1  
2  
3  
4  
5  
6  
7  
8  
9  
10  
11  
12  
13  
14  
15  
16  
17  
18  
19  
20  
21  
22  
23  
24  
25  
26  
27  
28  
29  
30  
31  
32  
33  
34  
35  
36  
37  
38  
39  
40  
41  
42  
43  
44  
45  
46  
47

---

|               |                                                                                                                     |   |
|---------------|---------------------------------------------------------------------------------------------------------------------|---|
| <b>TGMD-2</b> | MABC-2 total $r = 0.49$ $p < 0.01$ [5]. 'Teacher report' $r = 0.34-0.45$ . physical fitness $r = -0.47 - 0.55$ [49] | - |
|               | (N=41) Basic Motor Generalizations subtest of the CSSA $r = 0.63$ . Locomotor 0.63 object control                   |   |
|               | 0.41 [25]                                                                                                           |   |

---

Bayley-III, Bayley Scale of Infant and Toddler Development 3<sup>rd</sup> edition; [28] BOT-2, Bruininks-Oseretsky Test of Motor Proficiency 2<sup>nd</sup> edition; [13] MABC-2, Movement Assessment Battery for Children 2<sup>nd</sup> edition; [24] MAND, McCarron Assessment of Neuromuscular Development; [29] NSMDA, Neurological Sensory Motor Developmental Assessment; [30] PDMS-2, Peabody Developmental Motor Scales 2<sup>nd</sup> edition; [31] TGMD-II, Test of Gross Motor Development 2<sup>nd</sup> edition; [25] NS, Not Specified; SD, Standard Deviation; CP, Cerebral Palsy; TD, Typically Developing; ICC, Intraclass Correlation Coefficient;  $\chi^2$ , Chi Squared; NDI, Neurodevelopmental Index; CSSA, Comprehensive Scales of Student Abilities

Supplementary table 6: Reliability of assessment tools

| Test              | Internal Consistency                                               | Test-Retest                                                       | Intra-rater | Inter-rater | Minimal detectable change                                              | Minimal clinical important difference |
|-------------------|--------------------------------------------------------------------|-------------------------------------------------------------------|-------------|-------------|------------------------------------------------------------------------|---------------------------------------|
| <b>BAYLEY III</b> | GM $\alpha = 0.87-0.93$ MC: $\alpha 0.90-0.96$ (24-42 months) [28] | Gross Motor subtest (N=47) $r=0.79$ Motor component $r=0.80$ [28] | -           | -           | SEM Gross motor subtest 0.85-1.08. of Motor component = 3.00-4.74 (24- | -                                     |

---

8

42 months) [28]

|                      |                                                                                                                                                     |                                                                                                                                                                     |                             |                                                               |                                                                                                     |                                                                                                     |
|----------------------|-----------------------------------------------------------------------------------------------------------------------------------------------------|---------------------------------------------------------------------------------------------------------------------------------------------------------------------|-----------------------------|---------------------------------------------------------------|-----------------------------------------------------------------------------------------------------|-----------------------------------------------------------------------------------------------------|
| <b>BOT-2</b>         | (N = 100) $\alpha = 0.92$ [35]<br><br>(N = 141) $\alpha = 0.86$ [17]<br><br>4-7 yrs (N= 620) $\alpha = 0.95$ 8-11 yrs (N= 450) $\alpha = 0.95$ [13] | (N = 100) ICC = 0.99 [35] (N = 141) ICC = 0.97 [17] 4-7 yrs (N = 43) $r = 0.81$ (8-12 yrs (N= 44) $r = 0.80$ [13]                                                   | -                           | Total motor composite 4-21 yrs (N = 47) $r = 0.98$ [13]       | 4.18 (sensitivity 55.10% specificity 72.55%) [35] 7.43 (sensitivity 42.49% specificity 65.72%) [17] | 6.53 (sensitivity 48.98% specificity 76.47%) [35] 6.55 (sensitivity 49.99% specificity 58.78%) [17] |
| <b>MABC-2 (AB 1)</b> | (N = 60) M.D $\alpha = 0.51$ , A&C $\alpha = 0.70$ , Bal $\alpha = 0.66$ [36] (N = 1823) $\alpha = 0.502$ [14] (N=50) $\alpha = 0.81-0.87$ [23]     | (N=60) ICC = 0.85 [36] Item ICC's 0.830-0.985 [14] ICC test-retest = 0.83 [23] Inter-rater test-retest ICC = 0.79 [23]                                              | (N=28) $\kappa = 0.71$ [23] | Item ICC's range 0.892-0.998 [14] (N=22) $\kappa = 0.60$ [23] | (N=28) Intrarater MDC = 3.43<br><br>(N=22) Inter-tester MDC = 3.81 [23]                             | -                                                                                                   |
| <b>MABC-2 (AB 2)</b> | Translated version (Japanese) (N=132) $\alpha = 0.602$ [37]                                                                                         | -                                                                                                                                                                   | ICC = 0.64 [18]             | ICC 0.63 [18]                                                 | Intra-rater SDC TTS: +/- 11.7 TSS +/- 3.3. Inter-rater SDC TTS +/-16.0 TSS +/- 3.8 [18]             | -                                                                                                   |
| <b>MABC-2</b>        | Subscales $\alpha = 0.78$ (M.D = 0.77, BS = 0.52, Bal = 0.77) [40] $\alpha = 0.88$ [41] (N = 141) $\alpha = 0.88$ [17]                              | N=60 (all 3 age bands) $r=0.80$ [24]<br><br>$r=0.74$ $p<0.0001$ (standard score). ICC standard score = 0.85 [40]<br><br>ICC 0.96 [41]<br><br>N = 141 ICC =0.96 [17] | ICC 0.88 [40]               | ICC 0.96-0.99 [40]                                            | SEM 1.34 (95%CI) = 3 [24] 1.83 (95%CI) [41] 1.83 (sensitivity 69.69% specificity 52.10%) [17]       | 1.39 (sensitivity 72.47% specificity 46.18%) [17, 41]                                               |

|    |               |                                                                                                                                                                                                                                                                                                               |                                                                                                                                                                                                                                                                                  |                                                                         |                                                                                                                                    |                                                                                         |                                                   |
|----|---------------|---------------------------------------------------------------------------------------------------------------------------------------------------------------------------------------------------------------------------------------------------------------------------------------------------------------|----------------------------------------------------------------------------------------------------------------------------------------------------------------------------------------------------------------------------------------------------------------------------------|-------------------------------------------------------------------------|------------------------------------------------------------------------------------------------------------------------------------|-----------------------------------------------------------------------------------------|---------------------------------------------------|
| 5  | <b>MAND</b>   | -                                                                                                                                                                                                                                                                                                             | -                                                                                                                                                                                                                                                                                | -                                                                       | -                                                                                                                                  | -                                                                                       | -                                                 |
| 7  | <b>NSMDA</b>  | Cross correlation matrix Item scoring (12+24months) 0.73 $p < 0.001$ , Functional grade (12+24months) 0.87 $p < 0.001$ [45]                                                                                                                                                                                   | -                                                                                                                                                                                                                                                                                | -                                                                       | -                                                                                                                                  | -                                                                                       | -                                                 |
| 13 | <b>PDMS-2</b> | ( $N=141$ ) $\alpha=0.89$ [17] 24-35m $\alpha=0.97$ , 36-47m $\alpha=0.95$ , 48-59m $\alpha=0.97$ , 60-71m $\alpha=0.98$ . For subgroups† $\alpha=0.99$ [31]                                                                                                                                                  | $N=141$ ICC= 0.97 [17]                                                                                                                                                                                                                                                           | unable to extract data for $\geq 24$ months [31]                        | unable to extract data for $\geq 24$ months [31]                                                                                   | 7.76 (sensitivity 60.65% specificity 74.13%) [17] SEM 24-59 months = 3, 60-71m = 2 [31] | 8.39 (sensitivity 61.65% specificity 71.34%) [17] |
| 19 | <b>TGMD-2</b> | ( $N=1438$ ) $\alpha=0.80$ [47] $N=75$ Locomotor subset $\alpha=0.71$ object control $\alpha=0.72$ [22] $N=120$ $\alpha = 0.72$ [49] $N= 99$ $\alpha = 0.90$ [51] $N = 1208$ Cronbach's $\alpha = 0.91$ (gross motor quotient). Locomotor 0.85 and object control 0.88. Note SEM GMQ = 4-5 SEM subsets=1 [25] | $N=63$ ICC=0.81 95% CI [47] $N=23$ ICC=0.92 total 95% CI [22] $N=99$ $r=0.98$ [51] Locomotor test $r = 0.90$ $p < 0.0001$ object control test $r = 0.91$ $p < 0.001$ [52] $N = 75$ $r=0.96$ overall (3-5 yrs $r = 0.91$ ), 6-8 years $r = 0.95$ ), (9-10 years $r = 0.94$ ) [25] | $N=32$ ICC=0.97 95% CI [47] $N=25$ ICC=0.95 95% CI [22] ICC = 0.78 [48] | Obj ICC=0.93 [19] ( $N=50$ ) ICC=0.89 [22] ICC=0.75 [48] $N=8$ $r=1.00$ [51] L.S ICC=0.88 Obj ICC=0.89 [52] $N = 30$ $r=0.98$ [25] | -                                                                                       | -                                                 |

Bayley-III, Bayley Scale of Infant and Toddler Development 3<sup>rd</sup> edition;[28] BOT-2, Bruininks-Oseretsky Test of Motor Proficiency 2<sup>nd</sup> edition;[13] MABC-2, Movement Assessment Battery for Children 2<sup>nd</sup> edition;[24] MAND, McCarron Assessment of Neuromuscular Development;[29] NSMDA, Neurological Sensory Motor Developmental Assessment;[30] PDMS-2, Peabody Developmental Motor Scales 2<sup>nd</sup> edition;[31] TGMD-II, Test of Gross Motor Development 2<sup>nd</sup> edition;[25] GM, Gross Motor Subset; MC, Motor Component; K, Kappa Coefficient; M.D, Manual Dexterity; BS, Ball Skills; BAL, Balance; A&C, Aiming and catching; SDC, Smallest Detectable Change; TTS, Total Test Score; TSS, Total Standard Score; †, gender, ethnicity, speech/language or physical disorder; Obj, Object Control Subset; L.S, Locomotion Subset

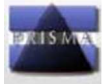

# PRISMA 2009 Checklist

1  
2  
3  
4  
5  
6  
7  
8  
9  
10  
11  
12  
13  
14  
15  
16  
17  
18  
19  
20  
21  
22  
23  
24  
25  
26  
27  
28  
29  
30  
31  
32  
33  
34  
35  
36  
37  
38  
39  
40  
41  
42  
43  
44  
45  
46  
47

| Section/topic                      | #  | Checklist item                                                                                                                                                                                                                                                                                              | Reported on page # |
|------------------------------------|----|-------------------------------------------------------------------------------------------------------------------------------------------------------------------------------------------------------------------------------------------------------------------------------------------------------------|--------------------|
| <b>TITLE</b>                       |    |                                                                                                                                                                                                                                                                                                             |                    |
| Title                              | 1  | Identify the report as a systematic review, meta-analysis, or both.                                                                                                                                                                                                                                         | 1 Title page       |
| <b>ABSTRACT</b>                    |    |                                                                                                                                                                                                                                                                                                             |                    |
| Structured summary                 | 2  | Provide a structured summary including, as applicable: background; objectives; data sources; study eligibility criteria, participants, and interventions; study appraisal and synthesis methods; results; limitations; conclusions and implications of key findings; systematic review registration number. | 2                  |
| <b>INTRODUCTION</b>                |    |                                                                                                                                                                                                                                                                                                             |                    |
| Rationale                          | 3  | Describe the rationale for the review in the context of what is already known.                                                                                                                                                                                                                              | 4-5                |
| Objectives                         | 4  | Provide an explicit statement of questions being addressed with reference to participants, interventions, comparisons, outcomes, and study design (PICOS).                                                                                                                                                  | 5                  |
| <b>METHODS</b>                     |    |                                                                                                                                                                                                                                                                                                             |                    |
| Protocol and registration          | 5  | Indicate if a review protocol exists, if and where it can be accessed (e.g., Web address), and, if available, provide registration information including registration number.                                                                                                                               | -                  |
| Eligibility criteria               | 6  | Specify study characteristics (e.g., PICOS, length of follow-up) and report characteristics (e.g., years considered, language, publication status) used as criteria for eligibility, giving rationale.                                                                                                      | 5-6                |
| Information sources                | 7  | Describe all information sources (e.g., databases with dates of coverage, contact with study authors to identify additional studies) in the search and date last searched.                                                                                                                                  | 5                  |
| Search                             | 8  | Present full electronic search strategy for at least one database, including any limits used, such that it could be repeated.                                                                                                                                                                               | 5                  |
| Study selection                    | 9  | State the process for selecting studies (i.e., screening, eligibility, included in systematic review, and, if applicable, included in the meta-analysis).                                                                                                                                                   | 5-6                |
| Data collection process            | 10 | Describe method of data extraction from reports (e.g., piloted forms, independently, in duplicate) and any processes for obtaining and confirming data from investigators.                                                                                                                                  | 6                  |
| Data items                         | 11 | List and define all variables for which data were sought (e.g., PICOS, funding sources) and any assumptions and simplifications made.                                                                                                                                                                       | 6                  |
| Risk of bias in individual studies | 12 | Describe methods used for assessing risk of bias of individual studies (including specification of whether this was done at the study or outcome level), and how this information is to be used in any data synthesis.                                                                                      | 6                  |
| Summary measures                   | 13 | State the principal summary measures (e.g., risk ratio, difference in means).                                                                                                                                                                                                                               | 7                  |



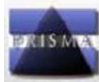

# PRISMA 2009 Checklist

1  
2  
3  
4  
5  
6  
7  
8  
9  
10  
11  
12  
13  
14  
15  
16  
17  
18  
19  
20  
21  
22  
23  
24  
25  
26  
27  
28  
29  
30  
31  
32  
33  
34  
35  
36  
37  
38  
39  
40  
41  
42  
43  
44  
45  
46  
47

|                      |    |                                                                                                                                                           |   |
|----------------------|----|-----------------------------------------------------------------------------------------------------------------------------------------------------------|---|
| Synthesis of results | 14 | Describe the methods of handling data and combining results of studies, if done, including measures of consistency (e.g., $I^2$ ) for each meta-analysis. | - |
|----------------------|----|-----------------------------------------------------------------------------------------------------------------------------------------------------------|---|

Page 1 of 2

| Section/topic                 | #  | Checklist item                                                                                                                                                                                           | Reported on page #                                               |
|-------------------------------|----|----------------------------------------------------------------------------------------------------------------------------------------------------------------------------------------------------------|------------------------------------------------------------------|
| Risk of bias across studies   | 15 | Specify any assessment of risk of bias that may affect the cumulative evidence (e.g., publication bias, selective reporting within studies).                                                             | -                                                                |
| Additional analyses           | 16 | Describe methods of additional analyses (e.g., sensitivity or subgroup analyses, meta-regression), if done, indicating which were pre-specified.                                                         | -                                                                |
| <b>RESULTS</b>                |    |                                                                                                                                                                                                          |                                                                  |
| Study selection               | 17 | Give numbers of studies screened, assessed for eligibility, and included in the review, with reasons for exclusions at each stage, ideally with a flow diagram.                                          | Figure 1 + page 7                                                |
| Study characteristics         | 18 | For each study, present characteristics for which data were extracted (e.g., study size, PICOS, follow-up period) and provide the citations.                                                             | Table 1 – page 8 + Suppl table 3                                 |
| Risk of bias within studies   | 19 | Present data on risk of bias of each study and, if available, any outcome level assessment (see item 12).                                                                                                | 10 + Table 3 – page 13-14                                        |
| Results of individual studies | 20 | For all outcomes considered (benefits or harms), present, for each study: (a) simple summary data for each intervention group (b) effect estimates and confidence intervals, ideally with a forest plot. | 10-11, 16 + Table 2 – page 12 + Figures 2 – 3 + Suppl tables 4-6 |
| Synthesis of results          | 21 | Present results of each meta-analysis done, including confidence intervals and measures of consistency.                                                                                                  | -                                                                |
| Risk of bias across studies   | 22 | Present results of any assessment of risk of bias across studies (see Item 15).                                                                                                                          | -                                                                |
| Additional analysis           | 23 | Give results of additional analyses, if done (e.g., sensitivity or subgroup analyses, meta-regression [see Item 16]).                                                                                    | -                                                                |

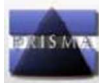

# PRISMA 2009 Checklist

| DISCUSSION          |    |                                                                                                                                                                                      |       |
|---------------------|----|--------------------------------------------------------------------------------------------------------------------------------------------------------------------------------------|-------|
| Summary of evidence | 24 | Summarize the main findings including the strength of evidence for each main outcome; consider their relevance to key groups (e.g., healthcare providers, users, and policy makers). |       |
| Limitations         | 25 | Discuss limitations at study and outcome level (e.g., risk of bias), and at review-level (e.g., incomplete retrieval of identified research, reporting bias).                        | 16-18 |
| Conclusions         | 26 | Provide a general interpretation of the results in the context of other evidence, and implications for future research.                                                              | 19    |
| FUNDING             |    |                                                                                                                                                                                      |       |
| Funding             | 27 | Describe sources of funding for the systematic review and other support (e.g., supply of data); role of funders for the systematic review.                                           | 1     |

From: Moher D, Liberati A, Tetzlaff J, Altman DG, The PRISMA Group (2009). Preferred Reporting Items for Systematic Reviews and Meta-Analyses: The PRISMA Statement. PLoS Med 6(7): e1000097. doi:10.1371/journal.pmed1000097

For more information, visit: [www.prisma-statement.org](http://www.prisma-statement.org).

Page 2 of 2

# BMJ Open

## Psychometric properties of gross motor assessment tools for children: a systematic review

|                                 |                                                                                                                                                                                                                                                                                                                                                                                                                                            |
|---------------------------------|--------------------------------------------------------------------------------------------------------------------------------------------------------------------------------------------------------------------------------------------------------------------------------------------------------------------------------------------------------------------------------------------------------------------------------------------|
| Journal:                        | <i>BMJ Open</i>                                                                                                                                                                                                                                                                                                                                                                                                                            |
| Manuscript ID                   | bmjopen-2018-021734.R1                                                                                                                                                                                                                                                                                                                                                                                                                     |
| Article Type:                   | Research                                                                                                                                                                                                                                                                                                                                                                                                                                   |
| Date Submitted by the Author:   | 19-Jun-2018                                                                                                                                                                                                                                                                                                                                                                                                                                |
| Complete List of Authors:       | Griffiths, Alison; Monash University, Physiotherapy; The Royal Children's Hospital, Physiotherapy<br>Toovey, Rachel; Murdoch Childrens Research Institute, Developmental Disability and Rehabilitation Research; University of Melbourne, Physiotherapy<br>Morgan, Prue; Monash University, Physiotherapy<br>Spittle, Alicia; University of Melbourne, Physiotherapy; Murdoch Childrens Research Institute, Victorian Infant Brain Studies |
| <b>Primary Subject Heading</b>: | Paediatrics                                                                                                                                                                                                                                                                                                                                                                                                                                |
| Secondary Subject Heading:      | Rehabilitation medicine                                                                                                                                                                                                                                                                                                                                                                                                                    |
| Keywords:                       | PAEDIATRICS, REHABILITATION MEDICINE, validity, gross motor assessment, reliability                                                                                                                                                                                                                                                                                                                                                        |
|                                 |                                                                                                                                                                                                                                                                                                                                                                                                                                            |

SCHOLARONE™  
Manuscripts

Only

# Psychometric properties of gross motor assessment tools for children: a systematic review

Alison Griffiths<sup>1,2,3</sup>, Rachel Toovey<sup>3,4</sup>, Prue E. Morgan<sup>1</sup>, Alicia J. Spittle<sup>3,4</sup>

1. Department of Physiotherapy, School of Primary and Allied Health Care, Monash University, Frankston, Victoria, Australia

2. Department of Physiotherapy, The Royal Children's Hospital, Parkville, Victoria, Australia

3. Murdoch Children's Research Institute, Parkville, Victoria, Australia

4. Department of Physiotherapy, The University of Melbourne, Parkville, Victoria, Australia

## Corresponding Author:

Name: A/Prof Alicia J. Spittle

Address: Department of Physiotherapy, The University of Melbourne, Level 7 Alan Gilbert Building, 161 Barry Street, Parkville, Vic 3010, Australia

Email: [aspittle@unimelb.edu.au](mailto:aspittle@unimelb.edu.au)

**Funding:** This study was part-funded by grants from the National Health and Medical Research Council Career Development Fellowship (AJS) 1053767 and Centre of Research Excellence in Newborn Medicine 1060733 (AJS and AG) and the Victorian Government's Operational Infrastructure Support Program.

**Financial disclosure:** The authors have declared that they have no financial relationships relevant to this article.

**Conflict of interest:** The authors have no conflict of interest.

**Keywords:** paediatrics, reliability, validity, rehabilitation medicine, gross motor assessment

# Abstract

## Objective:

Gross motor assessment tools have a critical role in identifying, diagnosing and evaluating motor difficulties in childhood. The objective of this review was to systematically evaluate the psychometric properties and clinical utility of gross motor assessment tools for children 2-12 years.

## Method:

A systematic search of MEDLINE, Embase, CINAHL and AMED was performed between May and July 2017. Methodological quality was assessed with the COnsensus-based Standards for the selection of health status Measurement INstruments (COSMIN) checklist and an outcome measures rating form was used to evaluate reliability, validity and clinical utility of assessment tools.

## Results:

Seven assessment tools from 37 studies/manuals met the inclusion criteria: Bayley Scale of Infant and Toddler Development-III (Bayley-III), Bruininks-Oseretsky Test of Motor Proficiency-2 (BOT-2), Movement Assessment Battery for Children-2 (MABC-2), McCarron Assessment of Neuromuscular Development (MAND), Neurological Sensory Motor Developmental Assessment (NSMDA), Peabody Developmental Motor Scales-2 (PDMS-2) and Test of Gross Motor Development-2 (TGMD-2). Methodological quality varied from poor to excellent. Validity and internal consistency varied from fair to excellent ( $\alpha$  0.5-0.99). The Bayley-III, NSMDA and MABC-2 have evidence of predictive validity. Test re-test reliability is excellent in the BOT-2 (ICC=0.80-0.99), PDMS-2 (ICC=0.97), MABC-2 (ICC=0.83-0.96) and TGMD-2 (ICC=0.81-0.92). TGMD-2 has the highest interrater (ICC 0.88-0.93) and intrarater reliability (ICC=0.92-0.99).

## Conclusions:

The majority of gross motor assessments for children have good-excellent validity. Test-retest reliability is highest in the BOT-2, MABC-2, PDMS-2 and TGMD-2. The Bayley-III has the best predictive validity at 2 years of age for later motor outcome. None of the

1  
2  
3 1 assessment tools demonstrate good evaluative validity. Further research on evaluative gross  
4  
5 2 motor assessment tools are urgently needed.  
6  
7  
8

### 9 3 Strengths and limitations of this study 10

- 11 4 • This systematic review comprehensively assesses methodological quality of included  
12 studies using the COSMIN checklist.  
13 5
- 14 6 • Results of this systematic review can provide guidance to clinicians when choosing  
15 gross motor assessment tools based on test psychometric properties and clinical  
16 utility.  
17 7
- 18 8 • Areas for future research are identified including improving the evidence of inter and  
19 intrarater reliability and responsiveness to change as well as the ascertainment of  
20 predictive validity over a longer period of time.  
21 9
- 22 10 • Only articles or test manuals written in English were included.  
23 11
- 24 12 • Only one reviewer screened titles and abstracts for inclusion  
25 13  
26 14

## 1 Introduction

2 Motor function promotes cognitive and perceptual development in children and contributes  
3 to their ability to participate in their home, school and community environments<sup>1</sup>. Motor  
4 impairment can negatively affect activity and participation levels of children<sup>2</sup>, which may  
5 lead to lower levels of physical activity, fitness and health into adulthood<sup>3</sup>. While severe  
6 motor deficits are usually diagnosed before 2 years of age, mild motor deficits may not  
7 become evident until children are in preschool and primary school environments where  
8 they are exposed to increasingly complex tasks and compared to their peers<sup>3</sup>. Identification  
9 of motor difficulties is an important step towards support and intervention for the child and  
10 their family.

11 Healthcare professionals and researchers require standardised assessment tools to identify,  
12 classify and diagnose motor problems in children<sup>4</sup>. Further, assessment tools are essential  
13 to monitor the effects of interventions<sup>4</sup>. There is no gold standard of motor assessment for  
14 children and the available tests vary in their ease of use and interpretability in clinical and  
15 research settings, and whether they are norm or criterion referenced<sup>5</sup>. Criterion referenced  
16 tests are designed to be scored as items or criteria are demonstrated; meaning that the  
17 score is a reflection of a child's competence on the test items. Most available assessments  
18 however, are norm referenced, meaning that a child's results are reported in relation to a  
19 specific population<sup>4</sup>. The characteristics of the normed population should be taken into  
20 consideration when interpreting test results as environmental and cultural differences have  
21 been found to affect motor development<sup>6</sup>.

22 Health professionals should be aware of the validity and reliability of assessment tools to  
23 assist in their instrument selection and interpretation of results. Validity refers to "The  
24 degree to which [an instrument] is an adequate reflection of the construct to be measured"  
25<sup>7</sup>. If an instrument does not have adequate construct or content validity then it may not be  
26 assessing the skills that it purports to. Reliability refers to "the degree to which the  
27 measurement is free from measurement error"<sup>7</sup>, which is significant when interpreting  
28 results. If a child is assessed as being significantly delayed in their gross motor skills, the  
29 reliability of that tool indicates the likelihood that a result is due to error.

1  
2  
3 1 A systematic review in 2010 by Slater<sup>8</sup> evaluated performance-based gross motor tests for  
4 2 children with developmental coordination disorder, however it did not include the second  
5 3 and most recent version of the Movement Assessment Battery for Children 2 (MABC-2),  
6 4 which is widely used. Brown and Lalor<sup>9</sup> suggested that as a result of the changes to the  
7 5 original Movement Assessment Battery for Children (MABC) in age range, age bands,  
8 6 materials and tasks, that the MABC-2 requires independent reliability and validity  
9 7 assessment. Over the past eight years there has also been a significant increase in the  
10 8 number of papers assessing the psychometric properties of motor assessment tools in  
11 9 children. A systematic review of these and previous papers is warranted, in order to add to  
12 10 our understanding of the psychometrics of standardised gross motor assessment tools.

13  
14  
15  
16  
17  
18  
19  
20  
21 11 The primary aim of this systematic review is to identify and evaluate the clinical utility and  
22 12 psychometric properties of gross motor assessment tools appropriate for use in preschool  
23 13 and school age children from 2-12 years by assessing the methodological quality of the  
24 14 included studies. The secondary aim of this review is to identify any areas for further  
25 15 research.

## 31 32 16 Method

33  
34  
35 17 A comprehensive search strategy was completed in databases OVID Medline (1996 to May  
36 18 2017), CINAHL plus (1937 to July 2017), Embase (1974 – May 2017) and AMED (1985 – July  
37 19 2017) (Supplementary tables 1-4). The search strategy used MeSH terms and text words for  
38 20 ('child' or 'paediatric') and ('motor skills' or 'motor activity' or 'gross motor' or  
39 21 'psychomotor' or 'developmental coordination disorder') and ('questionnaires' or 'outcome  
40 22 assessment' or 'instrument' or 'task performance') and ('reliability' or 'validity' or  
41 23 'psychometrics'). Reference lists of included articles were also screened to identify any  
42 24 additional papers. If full texts were unavailable or further information required regarding  
43 25 availability of manuals authors were contacted.

44  
45  
46  
47  
48  
49  
50  
51 26 Assessment tools were included if they were 1. Discriminative, predictive or evaluative of  
52 27 gross motor skills, 2. Assessed  $\geq$  two gross motor (e.g. balance, jumping etc.) items, 3. Able  
53 28 to extract a meaningful gross motor sub-score, 4. Applicable to children 2-12 years of age, 5.



1  
2  
3 1 Criterion or norm referenced test with a standardised assessment procedure and 6.  
4 2 Instructional manuals are published or commercially available.  
5  
6  
7 3 Articles describing use of the assessment tool were included if;  $\geq 90\%$  of the study  
8 4 population were within 2-12 years of age, it was available in English and if validity and/or  
9 5 reliability of the assessment tool was reported.  
10  
11  
12  
13 6 Assessment tools were excluded if they met any of the following criteria 1. Questionnaires  
14 7 or screening tools, 2. Only applicable to children with a specific diagnosis (e.g. cerebral  
15 8 palsy, Down's syndrome), 3. Test manuals not available in English and 4. The version of the  
16 9 test has been superseded.  
17  
18  
19  
20  
21 10 Titles and abstracts were screened by the first author with any studies that clearly did not  
22 11 meet inclusion criteria excluded. The remaining papers were obtained in full text and  
23 12 reviewed by two authors (AG, RT or PM) with selection based on inclusion and exclusion  
24 13 criteria. Papers and assessment tools were included after agreement by both raters, with  
25 14 conflicting decisions discussed until a consensus was reached.  
26  
27  
28  
29  
30  
31 15 Methodological assessment of the papers was completed using the four-point scale of the  
32 16 COnsensus-based Standards for the selection of health status Measurement INstruments  
33 17 (COSMIN) checklist<sup>10</sup>. The COSMIN incorporates three quality domains: Validity, Reliability  
34 18 and Responsiveness consisting of seven measurement properties: content, construct and  
35 19 criterion validity, internal consistency, reliability, measurement error and responsiveness<sup>7</sup>  
36 20 (Supplementary Table 5). Cross-cultural validity, structural validity and hypothesis testing  
37 21 are all considered to be a component of construct validity<sup>7</sup>. Whilst predictive validity is  
38 22 considered to be a component of content validity, it is reported on separately in this paper  
39 23 for interpretability of results<sup>7</sup>.  
40  
41  
42  
43  
44  
45  
46 24 The overall score for each measurement property on the COSMIN checklist is determined by  
47 25 a 'worse score counts' approach<sup>10</sup>. Each property is rated as excellent, good, fair or poor  
48 26 methodological quality based on descriptive criteria. Data extraction and assessment of  
49 27 methodological quality was performed independently by two assessors (AG and RT). In the  
50 28 case of any uncertainty a third reviewer (AS) performed a COSMIN assessment and  
51 29 disagreement was resolved through discussion.  
52  
53  
54  
55  
56  
57  
58  
59  
60

1  
2  
3 1 A data extraction form for each assessment tool was adapted from the CanChild Outcome  
4 2 Measures Rating Form to collate information on clinical utility, validity, reliability and  
5 3 responsiveness<sup>11</sup>. Items chosen to represent the clinical utility of the assessment tools were  
6 4 the cost of manuals, kits, training requirements, time to administer the assessment and the  
7 5 ease of scoring. All reported values for reliability were collected, however, only those papers  
8 6 reporting intraclass Correlation Coefficient (ICC) were directly compared.

## 7 Results

8 Figure 1 provides details of study selection. Seven assessment tools were identified for  
9 inclusion; Bayley Scale of Infant and Toddler Development III (Bayley-III), Bruininks-  
10 Oseretsky Test of Motor Proficiency 2 (BOT-2), Movement Assessment Battery for Children 2  
11 (MABC-2), McCarron Assessment of Neuromuscular Development (MAND), Neurological  
12 Sensory Motor Developmental Assessment (NSMDA), Peabody Developmental Motor Scales  
13 2 (PDMS-2), and Test of Gross Motor Development 2 (TGMD-2). The corresponding manuals  
14 were then added to the final yield resulting in thirty papers and seven manuals. Twenty  
15 assessment tools were excluded (Supplementary Table 6).

16 The majority of assessment tools identified in this review are discriminative and most lend  
17 themselves towards use in a research setting. All norm referenced tools are from western  
18 countries and each identified test covers a different age range as shown in Table 1.

19 The TGMD-2 is the only tool that assesses gross motor skills in isolation and that focusses on  
20 quality of performance. The other gross motor assessments were either in conjunction with  
21 assessment of fine motor and/or balance (MAND, MABC-2, BOT-2 and PDMS-2) or as a  
22 component of a developmental assessment (NSMDA, Bayley-III).

23 Despite the variability in test structures, there is some consistency of items included within  
24 the gross motor skill subsets between tests. Most include a locomotion task such as walking,  
25 running or stair climbing; an object control or manipulation task such as throwing or  
26 catching a ball; and a static or dynamic balance task such as standing on one leg or hopping.  
27 The PDMS-2, BOT-2 and the MAND also include strength assessments (the PDMS-2 only in  
28 some age groups).

1  
2  
3 1 The number of gross motor items for assessment vary both within and between the tools  
4 (Table 1). For example, the number of items tested in the Bayley-III and the PDMS-2  
5 2 depends on the age and ability of the child. Several assessments report criteria for  
6 3 describing gross motor delay, although all test manuals warn against diagnosing delay based  
7 4 on a single assessment.  
8 5  
9  
10  
11  
12  
13  
14  
15  
16  
17  
18  
19  
20  
21  
22  
23  
24  
25  
26  
27  
28  
29  
30  
31  
32  
33  
34  
35  
36  
37  
38  
39  
40  
41  
42  
43  
44  
45  
46  
47  
48  
49  
50  
51  
52  
53  
54  
55  
56  
57  
58  
59  
60

For peer review only

Table 1. Gross Motor Assessment Tool Characteristics

| Assessment Tool                 | Domains Tested                                                                                             | Gross motor components tested                                                                                                                          | Age range      | Diagnostic criteria                                                                                       | Primary purpose              | Secondary purpose                     | Type of test | Normative sample (year)                  |
|---------------------------------|------------------------------------------------------------------------------------------------------------|--------------------------------------------------------------------------------------------------------------------------------------------------------|----------------|-----------------------------------------------------------------------------------------------------------|------------------------------|---------------------------------------|--------------|------------------------------------------|
| <b>Bayley-III</b> <sup>12</sup> | Gross motor, fine motor, cognitive, communication, social/emotional, adaptive                              | Static postures, dynamic movement, balance                                                                                                             | 1 mth – 3 yrs  | Developmental delay: <25th centile or below 2SD. *                                                        | Discriminative               | Predictive, Evaluative, Research tool | Norm         | 1700 children from the USA (2000)        |
| <b>BOT-2</b> <sup>13</sup>      | Gross motor, fine motor                                                                                    | Coordination, balance, running speed and agility, strength                                                                                             | 4 – 21 yrs     | *                                                                                                         | Discriminative<br>Evaluative | Research tool                         | Norm         | 1520 children from the USA (2005)        |
| <b>MABC-2</b> <sup>14</sup>     | Gross motor, fine motor, balance                                                                           | Aiming and catching, static and dynamic balance                                                                                                        | 3 – 16 yrs     | Traffic light system: Green = normal, amber = 'at risk' and red = definite motor impairment (<15%). *     | Discriminative<br>Evaluative | Intervention planning, Research tool  | Norm         | 1172 children from United Kingdom (2006) |
| <b>MAND</b> <sup>15</sup>       | Gross and fine motor                                                                                       | Coordination, jumping, static and dynamic balance                                                                                                      | 3 yrs – 25 yrs | NDI 70-85 = mild<br>55-69 = moderate<br><55 = severe disability *                                         | Evaluative                   | Research tool                         | Norm         | 2000 3-35 yrs from the USA (1970's)      |
| <b>NSMDA</b> <sup>16</sup>      | Gross Motor, Fine Motor, Neurological, Postural Development, Infant Patterns of Movement, Sensory Motor. † | Sitting, kneeling, walking, balance, running, hopping, jumping, catching, motor planning                                                               | 1 mth – 6 yrs  | Total score 6-8 normal, 9-11 minimal, 12-14 mild, 15-19 moderate, 20-25 severe, >25 profound disability * | Evaluative<br>Discriminative | Predictive, Research tool             | Criterion    | N/A                                      |
| <b>PDMS-2</b> <sup>17</sup>     | Gross motor, fine motor                                                                                    | Stationary (standing balance, sit-ups, push-ups), locomotion (walking, running, jumping, hopping, etc.), object manipulation (kick, throw, hit, catch) | Birth – 5 yrs  | *                                                                                                         | Discriminative<br>Evaluative | Predictive, Research tool             | Norm         | 2003 USA and Canada (1997-8)             |

|   |                             |             |                                                                                                                    |            |   |                           |                                                       |      |                               |
|---|-----------------------------|-------------|--------------------------------------------------------------------------------------------------------------------|------------|---|---------------------------|-------------------------------------------------------|------|-------------------------------|
| 1 |                             |             |                                                                                                                    |            |   |                           |                                                       |      |                               |
| 2 |                             |             |                                                                                                                    |            |   |                           |                                                       |      |                               |
| 3 |                             |             |                                                                                                                    |            |   |                           |                                                       |      |                               |
| 4 |                             |             |                                                                                                                    |            |   |                           |                                                       |      |                               |
| 5 | <b>TGMD-2</b> <sup>18</sup> | Gross Motor | Locomotion (run, gallop, hop, leap, jump, slide) and Object control (batting, dribbling, catch, kick, throw, roll) | 3 – 10 yrs | * | Discriminative Evaluative | Outcome measure, research tool, intervention planning | Norm | 1208 USA children (1997-1998) |
| 6 |                             |             |                                                                                                                    |            |   |                           |                                                       |      |                               |
| 7 |                             |             |                                                                                                                    |            |   |                           |                                                       |      |                               |
| 8 |                             |             |                                                                                                                    |            |   |                           |                                                       |      |                               |
| 9 |                             |             |                                                                                                                    |            |   |                           |                                                       |      |                               |

10 Bayley-III, Bayley Scale of Infant and Toddler Development 3<sup>rd</sup> edition;<sup>12</sup> BOT-2, Bruininks-Oseretsky Test of Motor Proficiency 2<sup>nd</sup> edition;<sup>13</sup> MABC-2, Movement Assessment Battery for  
 11 Children 2<sup>nd</sup> edition;<sup>14</sup> MAND, McCarron Assessment of Neuromuscular Development;<sup>15</sup> NSMDA, Neurological Sensory Motor Developmental Assessment;<sup>16</sup> PDMS-2, Peabody Developmental  
 12 Motor Scales 2<sup>nd</sup> edition;<sup>17</sup> TGMD-II, Test of Gross Motor Development 2<sup>nd</sup> edition;<sup>18</sup> NDI, Neurodevelopmental Index; SD, Standard Deviation; mth, month; yrs, years \*, Advisable to use  
 13 clinical reasoning; †, requires some manual handling; USA, United States of America

1  
2  
3 1 The PDMS-2 is notable for the inclusion of credit towards incomplete skills in the scoring system.  
4 2 Most other tests award a point or credit towards a skill only if it is demonstrated to the full  
5 3 satisfaction of the stated criteria (score of 0 or 1). The PDMS-2 however is scored 0-2 allowing for 1  
6 4 mark to be allocated as a child progresses towards a skill without mastering it. The TGMD-2 is also  
7 5 notable for its marking system, in which points are awarded for the quality of the action performed,  
8 6 instead of satisfactory completion of the task only. These actions include preparatory movements  
9 7 prior to running and jumping, or arm position during movements. The NSMDA marking criteria is  
10 8 somewhat more complicated with a system of scores 1-4 with a symbol of “+” denoting hyperactive  
11 9 response and “-” a hyporeactive response. The PDMS-2, MABC-2, BOT-2, MAND, TGMD-2 and  
12 10 Bayley-III all require raw scores to be converted to a standard (or scaled) score based on tables  
13 11 supplied in the manuals. For the BOT-2 this is a multiple step process which can then be converted to  
14 12 both sex-specific or combined standard scores and percentile ranks. A summary of assessment tool  
15 13 characteristics can be found in Table 1.

#### 14 Clinical Utility

15 The clinical utility of the assessment tools is summarised in Table 2, while scoring and administration  
16 16 is detailed in Supplementary Table 7. The shortest administration time is 15-20 minutes for the  
17 17 TGMD-2 and the MAND; whilst most manuals report 20-60 minutes is required to complete an  
18 18 assessment. These times are not inclusive of equipment set up, pack up and scoring, which varies  
19 19 depending on the amount of equipment and complexity of the scoring process. All assessments  
20 20 require the user to be familiar with the test before administration and to possess a high level of  
21 21 understanding of child movement and development. The MABC-2 and PDMS-2 are the only  
22 22 assessments that come with supporting material to guide intervention post assessment (when the  
23 23 complete kit is purchased).

#### 24 Methodological quality

25 All articles were assessed using the COSMIN checklist to determine methodological quality. Several  
26 26 studies were marked down for failing to report missing data, small sample sizes and for using  
27 27 inappropriate statistical methods. A summary of the articles and corresponding COSMIN  
28 28 methodology rating is provided in Table 3.

## Validity

The content and construct validity of the included assessment tools are summarised in Table 4.

Most assessments were developed by or with input from experts in the field, with most also performing literature reviews. Bruininks and Bruininks<sup>13</sup> performed comprehensive surveys, pilot, tryout and standardisation studies before finalising the BOT-2, providing the most comprehensively reported content validity.

Construct validity was confirmed with factor analysis (either exploratory or confirmatory) in most assessment tools. The TGMD-2 has the most evidence for construct validity with several papers performing confirmatory and exploratory factor analysis<sup>19 20 18 21 22 23</sup>. The MABC-2, BOT-2, Bayley-III, MAND and PDMS-2 had factor analysis performed only in one paper. The MABC-2 was shown to require changes to remain valid in the Chinese and Dutch speaking populations<sup>24 25</sup>. The BOT-2, MABC-2 and TGMD-2 all provide evidence of the ability to discriminate between particular age or diagnosis groups, which can be considered to support their content validity. The NSMDA has minimal assessment of construct validity in children over 2 years. The Bayley-III, NSMDA and MABC-2 are the only assessments that provide evidence of predictive validity (Table 5). Concurrent validity between the MABC-2, PDMS-2 and BOT-2 is moderate to high, whilst the TGMD-2 is only weakly correlated with the MABC-2<sup>5</sup> (Table 5). The PDMS-2, TMGD-2 and NSMDA report correlations with other criteria such as paediatrician diagnosis, physical fitness or psychomotor/intelligence tests.

Table 2. Clinical Utility of Gross Motor Assessment Tools

| Assessment Tool                 | Time to administer (min)  | Test Procedure                                                               | Target Examiner population                                                   | Training                                                            | Equipment/Manual                                                               |
|---------------------------------|---------------------------|------------------------------------------------------------------------------|------------------------------------------------------------------------------|---------------------------------------------------------------------|--------------------------------------------------------------------------------|
| <b>Bayley-III</b> <sup>12</sup> | 30-90                     | Therapist administers in standardised order                                  | Paediatric health professionals<br>early childhood specialists               | Formal training not required. DVD, webinars and workshops available | Comprehensive manual/kit: £1089<br>Test kit provides most equipment            |
| <b>BOT-2</b> <sup>13</sup>      | 40-60                     | Therapist administered in standardised order                                 | Paediatric health professionals<br>early childhood specialists               | Formal training not required                                        | Comprehensive manual/kit: £961<br>Test kit provides most equipment             |
| <b>MABC-2</b> <sup>14</sup>     | 20-40                     | Therapist administers items in standardised order. Some flexibility allowed. | Research psychologists, OT, PT, Paediatricians                               | Formal training not required.                                       | Comprehensive manual/ kit: £1191<br>Test kit provides most equipment           |
| <b>MAND</b> <sup>15</sup>       | 15-20                     | Therapist administers items in standardised order.                           | Professionals e.g. education, neurology, OT, PT, psychology etc.             | Formal training not required.                                       | Manual and test kit: £1366 includes equipment                                  |
| <b>NSMDA</b> <sup>16</sup>      | 20-45                     | Observation followed by therapist administration of test items.              | PT, OT                                                                       | Formal training not required (but is available)                     | Comprehensive manual: £35.<br>Equipment not included                           |
| <b>PDMS-2</b> <sup>17</sup>     | 45-60 (20-30 for GM only) | Standardised procedure.                                                      | Paediatric health professionals, PE teachers, early intervention specialists | Formal training not required                                        | Comprehensive manual/kit: £553<br>Includes some but not all equipment required |
| <b>TGMD-2</b> <sup>18</sup>     | 15-20                     | Standardised procedure.                                                      | Teachers, health professionals (OT, PT, doctors)                             | Formal training not required                                        | Kit includes manual and record form: £128.<br>Equipment not included           |

Bayley-III, Bayley Scale of Infant and Toddler Development 3<sup>rd</sup> edition<sup>12</sup>; BOT-2, Bruininks-Oseretsky Test of Motor Proficiency 2<sup>nd</sup> edition<sup>13</sup>; MABC-2, Movement Assessment Battery for Children 2<sup>nd</sup> edition<sup>14</sup>; MAND, McCarron Assessment of Neuromuscular Development<sup>15</sup>; NSMDA, Neurological Sensory Motor Developmental Assessment<sup>16</sup>; PDMS-2, Peabody Developmental Motor Scales 2<sup>nd</sup> edition<sup>17</sup>; TGMD-II, Test of Gross Motor Development 2<sup>nd</sup> edition<sup>18</sup>; GM, Gross motor; OT, Occupational Therapy; PT, Physiotherapy; PE, Physical Education



Table 3. Methodological quality of included articles

| Test                     | First author, Year                       | Country                  | Population<br>(Age,<br>Diagnosis) | Internal<br>consistency | Reliability                             | Measurement<br>error | Content<br>validity | Structural<br>validity | Hypothesis<br>testing | Cross-<br>cultural<br>validity | Criterion<br>validity | Responsive -<br>ness |
|--------------------------|------------------------------------------|--------------------------|-----------------------------------|-------------------------|-----------------------------------------|----------------------|---------------------|------------------------|-----------------------|--------------------------------|-----------------------|----------------------|
| <b>BAYLEY III</b>        | Bayley <sup>12</sup>                     | USA                      | 1-42 mths                         | Fair                    | Fair                                    | Good                 | Excellent           | Good                   | Good                  | -                              | Good                  | -                    |
|                          | Spittle, et al. <sup>4</sup>             | Australia                | 2,4 yrs, Ex<br>prem               | -                       | -                                       | -                    | -                   | -                      | -                     | -                              | Good                  | -                    |
|                          | Visser, et al. <sup>26</sup>             | Netherlands              | 2.2-10.8 yrs,<br>GDD, L.I.        | -                       | -                                       | -                    | Excellent           | Poor                   | -                     | -                              | -                     | -                    |
| <b>BOT-2</b>             | Wuang and Su <sup>27</sup>               | Taiwan                   | 4-12 yrs ID                       | Excellent               | Excellent                               | Excellent            | -                   | -                      | -                     | -                              | -                     | Fair                 |
|                          | Wuang, et al. <sup>28</sup>              | Taiwan                   | 3-6 yrs ID                        | Fair                    | Good                                    | Good                 | -                   | -                      | -                     | -                              | Good                  | Fair                 |
|                          | Bruininks and<br>Bruininks <sup>13</sup> | USA                      | 4-21 yrs                          | Good                    | Fair (interrater)<br>Fair (test-retest) | Good                 | Excellent           | Good                   | -                     | -                              | Good                  | -                    |
| <b>MABC-2<br/>(AB 1)</b> | Ellinoudis, et al. <sup>29</sup>         | Greece                   | 3-5.5 yrs                         | Excellent               | Good                                    | -                    | -                   | -                      | -                     | -                              | -                     | -                    |
|                          | Hua, et al. <sup>24</sup>                | China                    | 3-6 yrs                           | Excellent               | Good                                    | -                    | Excellent           | Excellent              | -                     | Poor                           | Excellent             | -                    |
|                          | Logan, et al. <sup>5</sup>               | USA                      | 3-6 yrs                           | -                       | -                                       | -                    | -                   | -                      | Fair                  | -                              | Fair                  | -                    |
|                          | Smits-Engelsman, et<br>al. <sup>30</sup> | Belgium                  | 3-4 yrs                           | Poor                    | Poor                                    | Poor                 | -                   | -                      | -                     | -                              | -                     | -                    |
|                          | Holm, et al. <sup>31</sup>               | Norway                   | 7-9 yrs                           | -                       | Fair (interrater)<br>Poor (intrarater)  | Poor                 | -                   | -                      | -                     | -                              | -                     | -                    |
| <b>MABC-2<br/>(AB 2)</b> | Kita, et al. <sup>32</sup>               | Japan                    | 7-10 yrs                          | Excellent               | -                                       | -                    | -                   | -                      | -                     | Poor                           | -                     | -                    |
|                          | Griffiths, et al. <sup>33</sup>          | Australia                | 4-8 yrs                           | -                       | -                                       | -                    | -                   | -                      | -                     | -                              | Good                  | -                    |
| <b>MABC-2</b>            | Henderson, et al. <sup>14</sup>          | UK                       | 3-16 yrs                          | -                       | Fair                                    | Good                 | Excellent           | -                      | -                     | -                              | -                     | -                    |
|                          | Niemeijer, et al. <sup>25</sup>          | Netherlands<br>+ Belgium | -                                 | -                       | -                                       | -                    | -                   | -                      | -                     | Poor                           | -                     | -                    |
|                          | Schulz, et al. <sup>34</sup>             | U.K                      | 3-16 yrs                          | -                       | -                                       | -                    | Excellent           | Good                   | -                     | -                              | -                     | -                    |
|                          | Valentini, et al. <sup>35</sup>          | Brazil                   | 3-13 yrs                          | Fair                    | Fair                                    | -                    | Fair                | Poor                   | -                     | Poor                           | Poor                  | -                    |

1  
2  
3  
4  
5  
6  
7  
8  
9  
10  
11  
12  
13  
14  
15  
16  
17  
18  
19  
20  
21  
22  
23  
24  
25  
26  
27  
28  
29  
30  
31  
32  
33  
34  
35  
36  
37  
38  
39  
40  
41  
42  
43  
44  
45  
46  
47

|               |                                   |             |                   |           |                                         |      |           |           |      |      |           |      |
|---------------|-----------------------------------|-------------|-------------------|-----------|-----------------------------------------|------|-----------|-----------|------|------|-----------|------|
|               | Wuang, et al. <sup>28</sup>       | Taiwan      | 3-6 yrs, ID       | Fair      | Good                                    | Good | -         | -         | -    | -    | Good      | Fair |
|               | Wuang, et al. <sup>36</sup>       | Taiwan      | 6-12 yrs DCD      | Poor      | Fair                                    | Good | -         | -         | -    | -    | -         | Fair |
| <b>MAND</b>   | Hands, et al. <sup>37</sup>       | Australia   | 10-17 yrs         | -         | -                                       | -    | -         | Excellent | -    | -    | -         | -    |
|               | McCarron <sup>15</sup>            | USA         | 7yrs              | -         | -                                       | -    | Fair      | Poor      | -    | -    | Poor      | -    |
| <b>NSMDA</b>  | Danks, et al. <sup>38</sup>       | Australia   | 2 + 4 yrs<br>ELBW | -         | -                                       | -    | -         | -         | -    | -    | Fair      | -    |
|               | MacDonald and Burns <sup>39</sup> | Australia   | 2 + 4 yrs CP      | -         | -                                       | -    | -         | Fair      | -    | -    | Poor      | -    |
|               | Burns, et al. <sup>40</sup>       | Australia   | 1-24 mths<br>VLBW | Poor      | -                                       | -    | Poor      | -         | -    | -    | -         | -    |
|               | Burns, et al. <sup>41</sup>       | Australia   | 1-mnths<br>VLBW   | -         | -                                       | -    | -         | Poor      | -    | -    | Fair      | -    |
| <b>PDMS-2</b> | Hua, et al. <sup>24</sup>         | China       | 3-6 yrs.          | Excellent | Good                                    | -    | Excellent | Excellent | -    | Poor | Excellent | -    |
|               | Wuang, et al. <sup>28</sup>       | Taiwan      | 3-6 yrs ID        | Fair      | Good                                    | Good | -         | -         | -    | -    | Good      | Fair |
|               | Folio and Fewell <sup>17</sup>    | USA         | 0-71 mths         | Good      | -                                       | Poor | Excellent | Good      | Good | -    | Poor      | -    |
| <b>TGMD-2</b> | Barnett, et al. <sup>42</sup>     | Australia   | 4-8 yrs           | -         | Fair                                    | -    | -         | -         | -    | -    | -         | -    |
|               | Farrokhi, et al. <sup>43</sup>    | Iran        | 3-11 yrs          | Fair      | Fair                                    | -    | Fair      | Fair      | -    | -    | -         | -    |
|               | Houwen, et al. <sup>21</sup>      | Netherlands | 6-12 yrs VI       | Fair      | Fair                                    | -    | -         | Fair      | -    | -    | -         | -    |
|               | Kim, et al. <sup>44</sup>         | Korea       | 8-12 yrs ID       | -         | Poor                                    | -    | -         | -         | -    | -    | -         | -    |
|               | Kim, et al. <sup>45</sup>         | Korea       | 5-6 yrs           | Poor      | Fair                                    | -    | -         | Poor      | -    | -    | Poor      | -    |
|               | Logan, et al. <sup>5</sup>        | USA         | 3-6 yrs           | -         | -                                       | -    | -         | -         | Fair | -    | Fair      | -    |
|               | Rudd, et al. <sup>19</sup>        | Australia   | 6-12 yrs          | -         | -                                       | -    | -         | Good      | -    | -    | -         | -    |
|               | Simons, et al. <sup>23</sup>      | Belgium     | 7-10 yrs ID       | Good      | Good (interrater)<br>Poor (test-retest) | -    | Excellent | Good      | Good | -    | -         | -    |
|               | Valentini <sup>20</sup>           | Brazil      | 3-10 yrs          | Poor      | Fair (test-retest)<br>Good (intra,      | -    | Excellent | Good      | -    | Fair | Good      | -    |

1  
2  
3  
4  
5  
6  
7  
8  
9  
10  
11  
12  
13  
14  
15  
16  
17  
18  
19  
20  
21  
22  
23  
24  
25  
26  
27  
28  
29  
30  
31  
32  
33  
34  
35  
36  
37  
38  
39  
40  
41  
42  
43  
44  
45  
46  
47

| interrater)                       |       |          |      |                    |      |      |      |   |   |      |   |
|-----------------------------------|-------|----------|------|--------------------|------|------|------|---|---|------|---|
| Wong and Yin Cheung <sup>22</sup> | China | 3-10 yrs | -    | -                  | -    | -    | Fair | - | - | -    | - |
| Ulrich <sup>18</sup>              | USA   | 3-10 yrs | Good | Fair (test-retest) | Fair | Poor | Good | - | - | Fair | - |
| Poor (interrater)                 |       |          |      |                    |      |      |      |   |   |      |   |

Bayley-III, Bayley Scale of Infant and Toddler Development 3<sup>rd</sup> edition;<sup>12</sup> BOT-2, Bruininks-Oseretsky Test of Motor Proficiency 2<sup>nd</sup> edition;<sup>13</sup> MABC-2, Movement Assessment Battery for Children 2<sup>nd</sup> edition;<sup>14</sup> MAND, McCarron Assessment of Neuromuscular Development;<sup>15</sup> NSMDA, Neurological Sensory Motor Developmental Assessment;<sup>16</sup> PDMS-2, Peabody Developmental Motor Scales 2<sup>nd</sup> edition;<sup>17</sup> TGMD-II, Test of Gross Motor Development 2<sup>nd</sup> edition;<sup>18</sup> Mths, Months; yrs, years; DCD, Developmental Coordination Disorder; VI, Vision Impairment; ID, Intellectual Disability; GDD, global developmental delay; L.I, Language Impairment; ELBW, Extremely Low Birth Weight; VLBW, Very Low Birth Weight; CP, Cerebral Palsy; prem, premature; USA, United States of America

For peer review only

## 1 Reliability

2 Internal consistency of assessments are summarised in Table 6. The BOT-2's high internal  
3 consistency is well supported, including for children with an intellectual disability<sup>28 46</sup>. The MABC-2  
4 appears to have lower internal consistency than the BOT-2, which may relate to the limited number  
5 of test items (eight) on the MABC-2. The highest values for internal consistency for the MABC-2  
6 were obtained in specific populations (intellectual disability and developmental coordination  
7 disorder) with poor to fair methodology only. Conversely the highest quality articles reported the  
8 lowest values, although it should be noted that these assessed age band 1 (3-6 years) only. Internal  
9 consistency is reported to be high for the PDMS-2, while the Bayley-III is shown to have excellent  
10 internal consistency in children aged 24-42 months.. The TGMD-2 is reported by two good quality  
11 (and four poor to fair quality) articles to have excellent internal consistency, including for children  
12 with vision impairment and intellectual disability. The MAND is the only assessment tool included in  
13 this review without published data of internal consistency or reliability in this age group.

14 The reliability findings are summarised in Table 6 and in Figures 2 and 3. Test-retest reliability was  
15 excellent in the Bayley-III (Table 6), BOT-2 and PDMS-2; and was good to excellent in the MABC-2  
16 and TGMD-2 (Figure 2). Intra-rater reliability was rarely investigated or reported for most tools, with  
17 the TGMD-2 demonstrating better results than the MABC-2 (Figure 3). Only the TGMD-2 and  
18 MABC-2 report inter-rater reliability values using an ICC (Figure 3)<sup>31 42</sup>. Inter-rater reliability is also  
19 supported in the BOT-2 with Pearson Correlation Coefficient and Kappa respectively. The studies  
20 referred to in the test manuals for the TGMD-2, Bayley-III, BOT-2 and MABC-2 all report reliability  
21 findings using Pearson's correlation, which is less ideal than an ICC or weighted kappa for statistical  
22 analysis<sup>47 48</sup>. Only studies reporting ICC's are visually represented in Figures 2 (test-retest) and 3  
23 (inter and intra-rater). The TGMD-2 test-retest reliability results from Houwen, et al.<sup>21</sup> were  
24 believed to contain an error as the reported ICC was outside of the reported confidence intervals  
25 (ICC 0.92, 0.82-0.91). This data set was therefore excluded from Figure 2.

26 Responsiveness was reported for the Bayley-III, BOT-2, MABC-2 and PDMS-2 with minimal  
27 detectable change (MDC) or a standard error of measurement (SEM)<sup>28</sup>. Sensitivity and specificity  
28 for detecting change was shown to be satisfactory in the MABC-2, PDMS-2 and MABC-2<sup>28</sup> (Table 6).  
29 There have been no studies to date on the responsiveness of the TGMD-2, NSMDA or MAND.

Table 4: Content and construct validity of assessment tools

| Test              | Content                                                                                                                                                                                                                                                                                        | Construct                                                                                                                                                                                                                                                                                                                                                                                                                                                                                                                                                                                                                                                                                                           |
|-------------------|------------------------------------------------------------------------------------------------------------------------------------------------------------------------------------------------------------------------------------------------------------------------------------------------|---------------------------------------------------------------------------------------------------------------------------------------------------------------------------------------------------------------------------------------------------------------------------------------------------------------------------------------------------------------------------------------------------------------------------------------------------------------------------------------------------------------------------------------------------------------------------------------------------------------------------------------------------------------------------------------------------------------------|
| <b>BAYLEY III</b> | Expert opinion for standard and low verbal version <sup>12 26</sup> . Literature reviews. Gross motor score correlated with Motor component 0.70 <sup>12</sup>                                                                                                                                 | Factor analysis. Difference in mean scores with pervasive developmental disorder, and specific language impairment <sup>12</sup> . $H_i$ (gross motor subset) = 0.52-0.97 for children with language impairment and 0.82-0.99 in control group <sup>26</sup>                                                                                                                                                                                                                                                                                                                                                                                                                                                        |
| <b>BOT-2</b>      | Focus groups, product survey, pilot, national tryout and standardisation studies, professional reviews <sup>13</sup>                                                                                                                                                                           | Factor analysis, scores increase with age, discriminates between normal and children with DCD ( $N=50$ ), high-functioning ASD ( $N=45$ ) and mild-moderate ID ( $N=66$ ) <sup>13</sup>                                                                                                                                                                                                                                                                                                                                                                                                                                                                                                                             |
| <b>MABC-2</b>     | Expert Panel, Stakeholder feedback, Literature review <sup>31</sup><br><br>Expert panel - clarity (validity content index 71.8-93.9, Kappa 0.76-0.88) and pertinence (98.5-99.3 and kappa 0.83-0.92) $p<0.001$ <sup>35</sup>                                                                   | Factor analysis, correlation coefficients <sup>29</sup> Subtest correlations 0.65-0.76 $p<0.001$ . Discriminates between ASD and control group <sup>31</sup> . Structural equation modelling (for each age group) <sup>34</sup> . Expert panel - adequate face validity <sup>35</sup> . Significant difference between TD, DCD and at risk DCD scores ( $\eta^2 = 0.63$ ) $p<0.0001$ <sup>35</sup> . UK norms not appropriate to use with Dutch/Flemish children as under/over-estimate risk of motor impairment <sup>25</sup> . In Chinese population: CFA initially rejected. Acceptable fit achieved after 2 items removed <sup>24</sup> . Age band 2 shows good validity in Japanese population <sup>32</sup> . |
| <b>MAND</b>       | Based on neuropsychological theory. Several rounds of revision/trials of tasks during development <sup>15</sup>                                                                                                                                                                                | Factor analysis <sup>15 37</sup> . Scores increase with age, and discriminate between typically developing children and those with head trauma or neurological dysfunction as well as gender <sup>15 37</sup>                                                                                                                                                                                                                                                                                                                                                                                                                                                                                                       |
| <b>NSMDA</b>      | Literature review. Developed by an experienced paediatric physiotherapist <sup>40</sup>                                                                                                                                                                                                        | Factor analysis (up to 2 years of age) <sup>40 41</sup> . Stability of test results over time (up to 2 years) <sup>40 41</sup> .                                                                                                                                                                                                                                                                                                                                                                                                                                                                                                                                                                                    |
| <b>PDMS-2</b>     | Literature review. Created by experts in the field. Revised with feedback from therapists guided revision. Hierarchical sequence of items <sup>17</sup>                                                                                                                                        | Item response modelling. Factor analysis. Differential item functioning analysis. Scores correlated with age ( $r=0.80-0.93$ ) <sup>17</sup>                                                                                                                                                                                                                                                                                                                                                                                                                                                                                                                                                                        |
| <b>TGMD-2</b>     | Expert Panel (3 PE teachers with post-grad qualifications) <sup>18</sup> . Translated version (Brazilian Portuguese) language clarity 0.96, pertinence $>0.89$ . Experts CVI for clarity and pertinence were also strong- $\alpha = 0.93$ clarity and $\alpha = 0.91$ pertinence <sup>20</sup> | Exploratory and confirmatory factor analysis <sup>19 20 18 21 22 23</sup> High and significant correlation of increasing age and increasing scores <sup>43</sup> . Age and disability differentiation <sup>18 23</sup> Subtest correlation 0.41 <sup>18</sup><br><br>Gallop, running and leaping not well correlated with locomotion subscale. Object control significant & highly correlated <sup>45</sup> . ANOVA - significant age effect for object control <sup>23</sup><br><br>Moderate correlation between items and subset scores, and between subset scores and total score <sup>23</sup>                                                                                                                  |

Bayley-III, Bayley Scale of Infant and Toddler Development 3<sup>rd</sup> edition;<sup>12</sup> BOT-2, Bruininks-Oseretsky Test of Motor Proficiency 2<sup>nd</sup> edition;<sup>13</sup> MABC-2, Movement Assessment Battery for Children 2<sup>nd</sup> edition;<sup>14</sup> MAND, McCarron Assessment of Neuromuscular Development;<sup>15</sup> NSMDA, Neurological Sensory Motor Developmental Assessment;<sup>16</sup> PDMS-2, Peabody Developmental Motor Scales 2<sup>nd</sup> edition;<sup>17</sup> TGMD-II, Test of Gross Motor Development 2<sup>nd</sup> edition;<sup>18</sup>;  $H_i$ , scalability coefficient; CFA, Confirmatory Factor Analysis; TD, Typically Developing; ASD, Autism Spectrum Disorder, ID, Intellectual Disability; WPPSI, *Wechsler Preschool and Primary Scale of Intelligence*; WISC-R, Wechsler Preschool and Primary Scale of Intelligence-R; NDI, Neurodevelopmental Index; ANOVA, Analysis of Variance

Table 5: Criterion and predictive validity of assessment tools

| Test              | Criterion                                                                                                                                                                                                                                                        | Predictive                                                                                                                                                                                                                                                                                                                                                                        |
|-------------------|------------------------------------------------------------------------------------------------------------------------------------------------------------------------------------------------------------------------------------------------------------------|-----------------------------------------------------------------------------------------------------------------------------------------------------------------------------------------------------------------------------------------------------------------------------------------------------------------------------------------------------------------------------------|
| <b>BAYLEY III</b> | Given but mean age <22 months. Not relevant to study population. <sup>12</sup>                                                                                                                                                                                   | Motor impairment at 4 years: Bayley III at 2 years <1SD = sensitivity 0.32-0.37 specificity 0.97 <2SD sensitivity 0.18-0.21 specificity 1.00.<br>CP at 4 years: Bayley III at 2 years <1SD sensitivity 0.83 specificity 0.94. <2SD sensitivity 0.67 specificity 1.0 <sup>4</sup>                                                                                                  |
| <b>BOT-2</b>      | MABC-2 $\rho = 0.92$ PDMS-2 $\rho = 0.88$ ( $N = 38$ ) <sup>28</sup> . PDMS-2 Total motor composite $r = 0.77$ <sup>13</sup> .                                                                                                                                   | -                                                                                                                                                                                                                                                                                                                                                                                 |
| <b>MABC-2</b>     | PDMS-2 $\rho = 0.631 - 0.84$ <sup>28,24</sup> . TGMD-2 $\rho = 0.45$ <sup>5</sup> . TGMD-2 standard scores ( $r = 0.3, p < 0.02$ ) <sup>35</sup> . BOT-2 $\rho = 0.90 - 0.92$ <sup>28</sup> .                                                                    | Classification groups (DCD, at risk and TD) remained same over time (6 months) $\chi^2 = 0.67 p = 0.72$ <sup>35</sup> . Predictive of motor impairment over 6-12 months ( $N=41$ ) ICC $0.88 p < 0.007$ <sup>35</sup> . Scores at 4 years predictive of motor impairment at 8 years in children born <30 weeks gestation (PPV 79, sensitivity 79%, specificity 93%) <sup>33</sup> |
| <b>MAND</b>       | Gross motor subscore: Low-moderate correlation with manual dexterity (-0.46 to 0.35), reaction time (-0.31 to -0.58), intelligence measures (WISC-R, Metropolitan Achievement Test) (0.30-0.39) and visual motor test (-0.33 to 0.39) <sup>15</sup>              | -                                                                                                                                                                                                                                                                                                                                                                                 |
| <b>NSMDA</b>      | NSMDA at 2 years ( $N = 148$ ) predictive of medical diagnosis $\chi^2 = 0.08 p = NS$ <sup>41</sup>                                                                                                                                                              | Motor outcome at 11-13 yrs. NSMDA at 2 years - sensitivity 48.8%, specificity 82.4%, NSMDA at 4 years sensitivity 64.5%, and specificity 80%. PPV at 2 years 83% at 4 years 87% <sup>38</sup> . If classified 'severe' at 24 months - approximately 50% chance walking at 4 years (moderate = 80%, mild = 93% minimal = 100%) <sup>39</sup>                                       |
| <b>PDMS-2</b>     | MABC-2 $\rho = 0.63 - 0.84$ , <sup>24,28</sup> MABC-2 gross motor composite $\rho = 0.743$ <sup>24</sup><br>BOT-2 $\rho = 0.88$ <sup>28</sup> . Mullen Scales of Early Learning GMQ = 0.86 FMQ = 0.80 <sup>17</sup>                                              | -                                                                                                                                                                                                                                                                                                                                                                                 |
| <b>TGMD-2</b>     | MABC-2 total $r = 0.49 p < 0.01$ <sup>5</sup> . 'Teacher report' $r = 0.34-0.45$ . physical fitness $r = -0.47 - 0.55$ <sup>45</sup><br>( $N=41$ ) Basic Motor Generalizations subtest of the CSSA $r = 0.63$ . Locomotor 0.63 object control 0.41 <sup>18</sup> | -                                                                                                                                                                                                                                                                                                                                                                                 |

Bayley-III, Bayley Scale of Infant and Toddler Development 3<sup>rd</sup> edition;<sup>12</sup> BOT-2, Bruininks-Oseretsky Test of Motor Proficiency 2<sup>nd</sup> edition;<sup>13</sup> MABC-2, Movement Assessment Battery for Children 2<sup>nd</sup> edition;<sup>14</sup> MAND, McCarron Assessment of Neuromuscular Development;<sup>15</sup> NSMDA, Neurological Sensory Motor Developmental Assessment;<sup>16</sup> PDMS-2, Peabody Developmental Motor Scales 2<sup>nd</sup> edition;<sup>17</sup> TGMD-II, Test of Gross Motor Development 2<sup>nd</sup> edition;<sup>18</sup> NS, Not Specified; SD, Standard Deviation; CP, Cerebral Palsy; TD, Typically Developing; ICC, Intraclass Correlation Coefficient;  $\chi^2$ , Chi Squared; NDI, Neurodevelopmental Index; CSSA, Comprehensive Scales of Student Abilities

Table 6: Reliability of assessment tools

| Test                 | Internal Consistency                                                                                                                                                        | Test-Retest                                                                                                                                                                                 | Intra-rater                                 | Inter-rater                                                                     | Minimal detectable change                                                                                                | Minimal clinical important difference                                                                                 |
|----------------------|-----------------------------------------------------------------------------------------------------------------------------------------------------------------------------|---------------------------------------------------------------------------------------------------------------------------------------------------------------------------------------------|---------------------------------------------|---------------------------------------------------------------------------------|--------------------------------------------------------------------------------------------------------------------------|-----------------------------------------------------------------------------------------------------------------------|
| <b>BAYLEY III</b>    | GM $\alpha = 0.87$ -0.93 MC: $\alpha 0.90$ -0.96 (24-42 months) <sup>12</sup>                                                                                               | Gross Motor subtest (N=47) $r=0.79$<br>Motor component $r=0.80$ <sup>12</sup>                                                                                                               | -                                           | -                                                                               | SEM Gross motor subtest 0.85-1.08. of Motor component = 3.00-4.74 (24-42 months) <sup>12</sup>                           | -                                                                                                                     |
| <b>BOT-2</b>         | (N = 100) $\alpha = 0.92$ <sup>27</sup><br>(N = 141) $\alpha = 0.86$ <sup>28</sup><br>4-7 yrs (N= 620) $\alpha = 0.95$ 8-11 yrs (N= 450) $\alpha = 0.95$ <sup>13</sup>      | (N = 100) ICC = 0.99 <sup>27</sup> (N = 141) ICC = 0.97 <sup>28</sup> 4-7 yrs (N = 43) $r = 0.81$ (8-12 yrs (N= 44) $r = 0.80$ <sup>13</sup>                                                | -                                           | Total motor composite 4-21 yrs (N = 47) $r = 0.98$ <sup>13</sup>                | 4.18 (sensitivity 55.10% specificity 72.55%) <sup>27</sup> 7.43 (sensitivity 42.49% specificity 65.72%) <sup>28</sup>    | 6.53 (sensitivity 48.98% specificity 76.47%) <sup>27</sup> 6.55 (sensitivity 49.99% specificity 58.78%) <sup>28</sup> |
| <b>MABC-2 (AB 1)</b> | (N = 60) M.D $\alpha = 0.51$ , A&C $\alpha = 0.70$ , Bal $\alpha = 0.66$ <sup>29</sup> (N = 1823) $\alpha = 0.502$ <sup>24</sup> (N=50) $\alpha = 0.81$ -0.87 <sup>30</sup> | (N=60) ICC = 0.85 <sup>29</sup> Item ICC's 0.830-0.985 <sup>24</sup> ICC test-retest = 0.83 <sup>30</sup> Inter-rater test-retest ICC = 0.79 <sup>30</sup>                                  | (N=28) $\kappa = 0.71$ <sup>30</sup>        | Item ICC's range 0.892-0.998 <sup>24</sup> (N=22) $\kappa = 0.60$ <sup>30</sup> | (N=28) Intrarater MDC = 3.43 (N=22) Inter-tester MDC = 3.81 <sup>30</sup>                                                | -                                                                                                                     |
| <b>MABC-2 (AB 2)</b> | Translated version (Japanese) (N=132) $\alpha = 0.602$ <sup>32</sup>                                                                                                        | -                                                                                                                                                                                           | ICC = 0.64 <sup>31</sup>                    | ICC 0.63 <sup>31</sup>                                                          | Intra-rater SDC TTS: +/- 11.7 TSS +/- 3.3. Inter-rater SDC TTS +/-16.0 TSS +/- 3.8 <sup>31</sup>                         | -                                                                                                                     |
| <b>MABC-2</b>        | Subscales $\alpha = 0.78$ (M.D = 0.77, BS = 0.52, Bal = 0.77) <sup>35</sup> $\alpha = 0.88$ <sup>36</sup> (N = 141) $\alpha = 0.88$ <sup>28</sup>                           | N=60 (all 3 age bands) $r=0.80$ <sup>14</sup> $r=0.74$ $p<0.0001$ (standard score).<br>ICC standard score = 0.85 <sup>35</sup><br>ICC 0.96 <sup>36</sup><br>N = 141 ICC =0.96 <sup>28</sup> | ICC 0.88 <sup>35</sup>                      | ICC 0.96-0.99 <sup>35</sup>                                                     | SEM 1.34 (95%CI) = 3 <sup>14</sup> 1.83 (95%CI) <sup>36</sup> 1.83 (sensitivity 69.69% specificity 52.10%) <sup>28</sup> | 1.39 (sensitivity 72.47% specificity 46.18%) <sup>28 36</sup>                                                         |
| <b>MAND</b>          | -                                                                                                                                                                           | -                                                                                                                                                                                           | -                                           | -                                                                               | -                                                                                                                        | -                                                                                                                     |
| <b>NSMDA</b>         | Cross correlation matrix Item scoring (12+24months) 0.73 $p<0.001$ , Functional grade (12+24months) 0.87 $p<0.001$ <sup>40</sup>                                            | -                                                                                                                                                                                           | -                                           | -                                                                               | -                                                                                                                        | -                                                                                                                     |
| <b>PDMS-2</b>        | (N=141) $\alpha=0.89$ <sup>28</sup> 24-35m $\alpha=0.97$ , 36-47m $\alpha=0.95$ , 48-59m $\alpha=0.97$ , 60-71m $\alpha=$                                                   | N=141 ICC= 0.97 <sup>28</sup>                                                                                                                                                               | unable to extract data for $\geq 24$ months | unable to extract data for $\geq 24$ months <sup>17</sup>                       | 7.76 (sensitivity 60.65% specificity 74.13%) <sup>28</sup> SEM 24-                                                       | 8.39 (sensitivity 61.65% specificity 71.34%) <sup>28</sup>                                                            |

1  
2  
3  
4  
5  
6  
7  
8  
9  
10  
11  
12  
13  
14  
15  
16  
17  
18  
19  
20  
21  
22  
23  
24  
25  
26  
27  
28  
29  
30  
31  
32  
33  
34  
35  
36  
37  
38  
39  
40  
41  
42  
43  
44  
45  
46  
47

|               | o.98. For subgroups† $\alpha=0.99$ <sup>17</sup>                                                                                                                                                                                                                                                                                                          |                                                                                                                                                                                                                                                                                                                               | <sup>17</sup>                                                                                                                  | 59 months = 3, 60-71m = 2 <sup>17</sup>                                                                                                                                                   |
|---------------|-----------------------------------------------------------------------------------------------------------------------------------------------------------------------------------------------------------------------------------------------------------------------------------------------------------------------------------------------------------|-------------------------------------------------------------------------------------------------------------------------------------------------------------------------------------------------------------------------------------------------------------------------------------------------------------------------------|--------------------------------------------------------------------------------------------------------------------------------|-------------------------------------------------------------------------------------------------------------------------------------------------------------------------------------------|
| <b>TGMD-2</b> | ( $N=1438$ ) $\alpha=0.80$ <sup>43</sup> $N=75$ Locomotor subset $\alpha=0.71$ object control $\alpha=0.72$ <sup>21</sup> $N=120$ $\alpha = 0.72$ <sup>45</sup> $N=99$ $\alpha = 0.90$ <sup>23</sup> $N = 1208$ Cronbach's $\alpha = 0.91$ (gross motor quotient). Locomotor 0.85 and object control 0.88. Note SEM GMQ = 4-5 SEM subsets=1 <sup>18</sup> | $N=63$ ICC=0.81 95% CI <sup>43</sup> $N=23$ ICC=0.92 total 95% CI <sup>21</sup> $N=99$ $r=0.98$ <sup>23</sup> Locomotor test $r = 0.90$ $p < 0.0001$ object control test $r = 0.91$ $p < 0.001$ <sup>20</sup> $N = 75$ $r=0.96$ overall (3-5 yrs $r = 0.91$ ), 6-8 years $r = 0.95$ ), (9-10 years $r = 0.94$ ) <sup>18</sup> | $N=32$ ICC=0.97 95% CI <sup>43</sup> $N=25$ ICC=0.95 95% CI <sup>21</sup> ICC = 0.78 <sup>44</sup> ICC=0.92-0.99 <sup>20</sup> | Obj ICC=0.93 <sup>42</sup> ( $N=50$ ) ICC=0.89 <sup>21</sup> ICC=0.75 <sup>44</sup> $N=8$ $r= 1.00$ <sup>23</sup> L.S ICC=0.88 Obj ICC=0.89 <sup>20</sup> $N = 30$ $r=0.98$ <sup>18</sup> |

Bayley-III, Bayley Scale of Infant and Toddler Development 3<sup>rd</sup> edition;<sup>12</sup> BOT-2, Bruininks-Oseretsky Test of Motor Proficiency 2<sup>nd</sup> edition;<sup>13</sup> MABC-2, Movement Assessment Battery for Children 2<sup>nd</sup> edition;<sup>14</sup> MAND, McCarron Assessment of Neuromuscular Development;<sup>15</sup> NSMDA, Neurological Sensory Motor Developmental Assessment;<sup>16</sup> PDMS-2, Peabody Developmental Motor Scales 2<sup>nd</sup> edition;<sup>17</sup> TGMD-II, Test of Gross Motor Development 2<sup>nd</sup> edition;<sup>18</sup> GM, Gross Motor Subset; MC, Motor Component; K, Kappa Coefficient; M.D, Manual Dexterity; BS, Ball Skills; BAL, Balance; A&C, Aiming and catching; SDC, Smallest Detectable Change; TTS, Total Test Score; TSS, Total Standard Score; †, gender, ethnicity, speech/language or physical disorder; Obj, Object Control Subset; L.S, Locomotion Subset



## Discussion

This review identified seven gross motor assessment tools appropriate for use in clinical or research settings, each with their own strengths and limitations. Interestingly, only one of the seven assessments (TGMD-2) measured gross motor skills in isolation. This is likely a reflection on current practice to assess children's development as a whole, rather than assessing individual domains in isolation. A gross motor assessment embedded within a developmental assessment, such as that of the Bayley-III may be more appropriate than an isolated gross motor assessment for children where there is suspicion of multiple impairments.

A review by Slater, et al.<sup>8</sup> reported that the TGMD-2 and the MABC (first edition) were recommended for assessing gross motor skills in children with developmental coordination disorder, but found that the MABC needed further evidence of validity. Cools, et al.<sup>49</sup> also published a detailed review of the clinical utility of gross motor assessment tools for children, but did not address the validity, reliability or responsiveness to change of these measures. This review adds to the literature by including updated information on the psychometric properties of the measures and a thorough methodological assessment using the COSMIN checklist which allows the reader to interpret these results with confidence. We have identified ten additional publications to support the content, construct and criterion validity of the MABC-2 and have demonstrated an overall higher methodological quality of the papers assessing the MABC-2 when compared with the TGMD-2. Papers that had been given lower methodological scores on the COSMIN can be attributed to inadequate reporting statistical methods, small sample sizes and non-independent assessors. Further research in this area should consider addressing these limitations in their study design to reduce potential error and increase confidence when interpreting results.

Content validity has been established for five of the included assessment tools, however, further research into the content validity for the MAND and NSMDA is required. The NSMDA's ability to predict a diagnosis of CP and motor outcomes over time does support its content validity, however the methodology scored as poor to fair on the COSMIN and as such content validity cannot be fully established. The use of expert panels, focus groups and/or stakeholder feedback for the BOT-2, MABC-2, TGMD-2 and PDMS-2 demonstrate thorough consideration of the relevance and comprehensiveness of the each test's assessment items during development.

1 The TGMD-2 is the only assessment tool considered to have well established construct validity, with  
2 several papers reporting factor analysis. The NSMDA has undergone factor analysis for children up to, but  
3 not beyond two years of age and as such further research is needed to support its validity in older children.  
4 All other included assessment tools have undergone factor analysis assessment of their construct validity in  
5 one paper and are supported by the ability to discriminate between medical diagnosis or age, and as such  
6 are considered to have adequate construct validity. The criterion validity indicates that the TGMD-2 may  
7 be measuring a slightly different construct to the other assessment tools included in this study as it has  
8 poor agreement with the MABC-2, which in turn has good agreement with the PDMS-2 and the BOT-2.  
9 This difference may be related to the inclusion of the assessment of quality of movement in the TGMD-2,  
10 or the inclusion of balance and/or fine motor tasks on the other assessments. There is scope to investigate  
11 the criterion validity of the MAND and the gross motor subsections of the Bayley-III and the NSMDA with  
12 the other assessment tools in this study in the future.

13 The BOT-2 was the only assessment tool to have its reliability assessed with excellent methodology. In  
14 conjunction with its reported results it can be considered to have the strongest evidence for internal  
15 consistency and test-retest reliability out of the included assessment tools. The PDMS-2 and the MABC-2  
16 can be considered to have the next best established test-retest reliability with good methodological  
17 quality. The reported test-retest reliability values for the TGMD-2 are impacted by the poor to fair  
18 methodological quality, and further high quality research needs to be done to support its body of evidence.  
19 Test-rest, inter or intra-rater reliability has not been assessed in the MAND and NSMDA. In the clinical  
20 context gross motor assessments are often repeated over time or between therapists and as such these  
21 measures of reliability should be established. The Bayley-III would also benefit from further research into  
22 its reliability, with no published inter or intra-rater reliability measures, and with only one, fair quality  
23 report of good test-retest reliability.

24 As yet there is little evidence to support the use of these assessments as outcome measures. The inclusion  
25 in some of the articles of minimal detectable change (MDC) and minimal clinically important difference  
26 (MCID) is valuable for clinicians<sup>7</sup>. The difference between MDC and MCID is also of importance, as a change  
27 in score does not necessarily relate to a meaningful change for the child or their family. Only the Bayley,  
28 BOT-2, MABC-2 and PDMS-2 have a reported MCID with satisfactory sensitivity and specificity, however,  
29 due to the fair methodological quality used to obtain these values they cannot be utilised with a high level  
30 of confidence until further studies have been performed. The TGMD-2 was created in part to be used as an  
31 outcome measure, however there are no articles to date investigating its responsiveness to change<sup>18</sup>. It  
32 should also be noted that all of the included assessment tools measure impairment and activity limitations,  
33 but do not specifically address the other elements of the International Classification of Functioning,

1 Disability and Health (ICF) domains of participation, personal factors and environment<sup>2</sup>. Clinicians should  
2 utilise appropriate assessments or questionnaires to ensure that these domains of health are also  
3 addressed in line with World Health Organisation guidelines<sup>2</sup>.

4 When considering a test's reliability all three elements of test error should be taken into account – these  
5 can be described as time sampling (assessed with test-retest reliability), content sampling (assessed as  
6 internal consistency), and inter-scorer difference (or interrater reliability)<sup>18</sup>. This is one of the reasons that  
7 clinicians should consider repeating assessments and/or completing a second alternative assessment. All  
8 assessments should be interpreted in conjunction with clinical reasoning and observation. Included  
9 assessment tools are not intended to be diagnostic on their own; results need to be combined with other  
10 assessments and expert opinion to arrive at a clinical diagnosis.

11 All of the included assessment tools were found to have merits and limitations in their clinical utility the  
12 body of evidence to support their use. Clinicians and researches should select their assessment tool with  
13 consideration of psychometric properties (inclusive of the methodological rigour behind them), clinical  
14 utility and for the population, situation and age group in question.

15 A potential limitation of this study was that one author screened the titles and abstracts, which may have  
16 led to a sampling bias. Whilst care was taken to include all potentially relevant papers and assessment  
17 tools until the second round of assessment with two authors, the potential for exclusion of papers relevant  
18 to this review remains. A second limitation was the restriction of included papers and manuals to those  
19 published in English. Unfortunately this resulted in the exclusion of three assessment tools that have been  
20 reported as commonly used in Europe: The Motoriktest für Vier- bis Sechjährige Kinder (MOT 4-6), the  
21 Körperkoordinationstest für Kinder (KTK) and the Maastrichtse Motoriek Test (MMT)<sup>49</sup>. The authors also  
22 note the third edition of the TGMD is soon to be published and will need to be subjected to a similar level  
23 of assessment of psychometric properties in the future.

24 Clinicians and parents who need guidance to set realistic therapy goals and to understand future  
25 intervention requirements benefit from understanding a test's predictive ability. The NSMDA and the  
26 MABC-2 are the only tools that have demonstrated long term (≥4 years follow up) predictive validity, while  
27 the Bayley-III has good predictive validity at 2 years for future movement difficulties and for the diagnosis  
28 of cerebral palsy at 4 years. However, further research into the long-term predictive validity of all included  
29 gross motor assessment tools is warranted.

30 While validity and reliability should guide selection of assessment tools, clinical utility must also be taken  
31 into consideration. Most tests have ongoing costs associated with forms and equipment replacement,

1 which may be prohibitive to some users. The NSMDA requires the therapist to handle the child for several  
2 items which should be considered in relation to manual handling policies of institutions. Assessment  
3 burden for children and families should also be taken into consideration when selecting an assessment  
4 tools. Younger children are more likely to be distracted and may not understand test items as well, which  
5 may also increase assessment times<sup>30</sup>.

6 When a new edition of an assessment tools is released resulting in a change in age groups, scoring or tasks  
7 it is insufficient to rely on the psychometric assessments that were performed on the original test. The  
8 MABC-2 manual provides justification for the inclusion of reliability and validity assessment of the original  
9 MABC<sup>14</sup>, however, owing to the significant changes in age groups and tasks between editions these were  
10 not included for the analysis of the MABC-2 in this review. Two studies quoted in the MABC-2 manual to  
11 support the validity and reliability are both unpublished works and as such are also unable to be included  
12 in this systematic review. This could indicate a publication for the MABC-2.

13 The thorough methodological assessment of the included articles using the COSMIN checklist should be  
14 seen as a strength of this paper, as should the range of assessment tools included in this review. While it  
15 has previously been argued that the 'worst score counts' criteria in the COSMIN creates a floor effect<sup>50</sup>,  
16 the COSMIN authors argue that only 'fatal flaws' contribute to an overall score of poor<sup>10</sup>. There are few  
17 tools available to assess the psychometric properties of assessment tools and arguably none so robustly  
18 validated as the COSMIN.

19 There are many appropriate gross motor assessment tools available for use in research and clinical settings  
20 today. Most of the available tools demonstrate adequate validity and reliability in children aged 2-12 and  
21 as such the authors do not believe that new assessment tools need to be developed for use. There is scope  
22 however to improve the evidence of inter and intra-rater reliability and predictive validity should be  
23 ascertained over a longer period of time and with greater methodological rigour. Tools also need clearer  
24 assessment of their responsiveness to change to assist clinicians and researchers with outcome measure  
25 selection. Researchers should be mindful of the methods they use to assess validity and reliability. Clarity  
26 of reporting, statistical methods and sample sizes should be carefully considered to ensure the highest  
27 quality of evidence.

## 28 Conclusion

29 Currently available gross motor assessment tools for children have good to excellent content and construct  
30 validity. The BOT-2, MABC-2, PDMS-2 and TGMD-2 are the most reliable assessments in this age group. The

1 Bayley-III has the best predictive validity at 2 years of age, and the NSMDA and the MABC-2 both have  
2 good predictive validity at 4 years of age. There is scope for further research into the predictive validity,  
3 reliability and responsiveness of gross motor assessment tools in preschool and school aged children. In  
4 practice clinicians should choose assessments with consideration of their psychometric properties in the  
5 context of the child that they are assessing.  
6  
7  
8  
9  
10  
11

## 12 **Author Contributions**

13  
14 8 All individuals listed as authors meet the appropriate authorship criteria and have approved the  
15 acknowledgement of their contributions. AG was responsible for the drafting of the paper and liaising with  
16 9 the co-authors on findings and conclusions. RT contributed to the paper through interpretation of data,  
17 10 completing methodological assessments and revising manuscript content throughout its development.  
18 11 A/Profs PEM and AJS both contributed to the paper through assisting with the development of research  
19 12 design, interpretation of data and revising manuscript content through its development.  
20  
21  
22  
23  
24  
25  
26  
27

## 28 **Data Sharing Statement**

29  
30 16 This paper includes data obtained from reviewing papers of published manuscripts. Data can be accessed  
31 by contacting the primary author.  
32  
33  
34  
35

## 36 **Figures**

37  
38  
39 19 Figure 1. PRISMA flow diagram detailing study selection  
40

41 20 Figure 2. Test re-test reliability of gross motor assessment tools  
42  
43

44 21 Figure 2 legend: BOT-2, Bruininks-Oseretsky Test of Motor Proficiency 2<sup>nd</sup> edition <sup>13</sup>; MABC-2, Movement  
45 22 Assessment Battery for Children 2<sup>nd</sup> edition <sup>14</sup>; PDMS-2, Peabody Developmental Motor Scales 2<sup>nd</sup> edition  
46 23 <sup>17</sup>; TGMD-II, Test of Gross Motor Development 2<sup>nd</sup> edition <sup>18</sup>.  
47  
48  
49

50 24 Figure 3. Inter and interrater reliability of gross motor assessment tools  
51

52 25 Figure 3 legend: MABC-2, Movement Assessment Battery for Children 2<sup>nd</sup> edition <sup>14</sup>; TGMD-II, Test of Gross  
53 26 Motor Development 2<sup>nd</sup> edition <sup>18</sup>  
54  
55  
56  
57  
58  
59

1 1  
2  
3  
4  
5  
6  
7  
8  
9  
10  
11  
12  
13  
14  
15  
16  
17  
18  
19  
20  
21  
22  
23  
24  
25  
26  
27  
28  
29  
30  
31  
32  
33  
34  
35  
36  
37  
38  
39  
40  
41  
42  
43  
44  
45  
46  
47  
48  
49  
50  
51  
52  
53  
54  
55  
56  
57  
58  
59  
60

For peer review only

## References

1. Piek JP, Baynam GB, Barrett NC. The relationship between fine and gross motor ability, self-perceptions and self-worth in children and adolescents. *Hum Mov Sci* 2006;25(1):65-75. doi: <http://dx.doi.org/10.1016/j.humov.2005.10.011>
2. World Health Organization. International Classification of Functioning, Disability and Health: ICF: World Health Organization 2001.
3. Magalhaes LC, Cardoso AA, Missiuna C. Activities and participation in children with developmental coordination disorder: a systematic review. *Res Dev Disabil* 2011;32(4):1309-16. doi: 10.1016/j.ridd.2011.01.029 [published Online First: 2011/02/19]
4. Spittle AJ, Spencer-Smith MM, Eeles AL, et al. Does the Bayley-III Motor Scale at 2 years predict motor outcome at 4 years in very preterm children? *Developmental Medicine And Child Neurology* 2013;55(5):448-52. doi: 10.1111/dmcn.12049
5. Logan SW, Robinson LE, Getchell N. The Comparison of Performances of Preschool Children on Two Motor Assessments. *Perceptual and Motor Skills* 2011;113(3):715-23.
6. Venetsanou F, Kambas A. Environmental factors affecting preschoolers' motor development. *Early Childhood Education Journal* 2010;37(4):319-27.
7. Mokkink LB, Terwee CB, Patrick DL, et al. The COSMIN study reached international consensus on taxonomy, terminology, and definitions of measurement properties for health-related patient-reported outcomes. *J Clin Epidemiol* 2010;63(7):737-45. doi: 10.1016/j.jclinepi.2010.02.006 [published Online First: 2010/05/25]
8. Slater LM, Hillier SL, Civetta LR. The clinimetric properties of performance-based gross motor tests used for children with developmental coordination disorder: A systematic review. *PEDIATRIC PHYSICAL THERAPY* 2010;22(2):170.
9. Brown T, Lalor A. The Movement Assessment Battery for Children—Second Edition (MABC-2): A Review and Critique. *Phys Occup Ther Pediatr* 2009;29(1):86-103.
10. Terwee CB, Mokkink LB, Knol DL, et al. Rating the methodological quality in systematic reviews of studies on measurement properties: a scoring system for the COSMIN checklist. *Qual Life Res* 2012;21(4):651-7. doi: 10.1007/s11136-011-9960-1 [published Online First: 2011/07/07]
11. Law M. Outcome measures rating form. Ontario, Canada: CanChild Centre for Disability Research, 2004.
12. Bayley N. Bayley Scales of Infant Development and Toddler Development: Technical Manual: The PsychCorp 2006.
13. Bruininks R, Bruininks B. Bruininks-Oseretsky Test of Motor Proficiency—2nd Edition (BOT-2): Manual. Circle Pines: MN: AGS Publishing 2005.
14. Henderson SE, Sugden DA, Barnett AL. Movement assessment battery for children-2: Movement ABC-2: Examiner's manual: Pearson 2007.
15. McCarron LT. MAND: McCarron assessment of neuromuscular development, fine and gross motor abilities: McCarron-Dial Systems, Incorporated 1997.



- 1 16. Burns YR. N.S.M.D.A Physiotherapy Assessment for Infants and Young Children Second Edition. Brisbane,  
2 Queensland: CopyRight Publishing Company 2014.
- 3 3 17. Folio M, Fewell R. Peabody Developmental Motor Scales. Examiner's Manual . 2nd Edition. Austin, Texas.:  
4 Pro-Ed. 2000.
- 5 4  
6 5 18. Ulrich DA. Test of gross motor development-2. *Austin: Prod-Ed 2000*
- 7 5  
8 6 19. Rudd J, Butson ML, Barnett L, et al. A holistic measurement model of movement competency in children.  
9 *Journal of Sports Sciences 2016;34(5):477-85.*
- 10 7  
11 8 20. Valentini NC. Validity and reliability of the TGMD-2 for Brazilian children. *Journal of Motor Behavior*  
12 2012;44(4):275-80.
- 13 9  
14 10 21. Houwen S, Hartman E, Jonker L, et al. Reliability and validity of the TGMD-2 in primary-school-age children  
15 with visual impairments. *Adapted Physical Activity Quarterly 2010;27(2):143-59.*
- 16 11  
17 12 22. Wong KYA, Yin Cheung S. Confirmatory factor analysis of the Test of Gross Motor Development-2.  
18 *Measurement in Physical Education & Exercise Science 2010;14(3):202-09. doi:*  
19 13 *10.1080/10913671003726968*
- 20 14  
21 15 23. Simons J, Daly D, Theodorou F, et al. Validity and reliability of the TGMD-2 in 7-10-year-old Flemish  
22 children with intellectual disability. *Adapted physical activity quarterly : APAQ 2008;25(1):71-82.*
- 23 16  
24 17 24. Hua J, Gu G, Meng W, et al. Age band 1 of the Movement Assessment Battery for Children-Second Edition:  
25 exploring its usefulness in mainland China. *Research in Developmental Disabilities 2013;34(2):801-8.*
- 26 18  
27 19 25. Niemeijer AS, van Waelvelde H, Smits-Engelsman BC. Crossing the North Sea seems to make DCD  
28 disappear: cross-validation of Movement Assessment Battery for Children-2 norms. *Hum Mov Sci*  
29 2015;39:177-88. doi: 10.1016/j.humov.2014.11.004
- 30 20  
31 21 26. Visser L, Ruiters SAJ, Van der Meulen BF, et al. Low verbal assessment with the Bayley-III. *Research in*  
32 22 *Developmental Disabilities 2015;36:230-43.*
- 33 23  
34 24 27. Wuang YP, Su CY. Reliability and responsiveness of the Bruininks-Oseretsky Test of Motor Proficiency-  
35 Second Edition in children with intellectual disability. *Research in Developmental Disabilities 2009;30(5):847-*  
36 25 *55.*
- 37 26  
38 27 28. Wuang YP, Su CY, Huang MH. Psychometric comparisons of three measures for assessing motor functions  
39 in preschoolers with intellectual disabilities. *Journal of Intellectual Disability Research 2012;56(6):567-78.*
- 40 28  
41 29 29. Ellinoudis T, Evaggelina C, Kourtessis T, et al. Reliability and validity of age band 1 of the Movement  
42 Assessment Battery for Children--second edition. *Res Dev Disabil 2011;32(3):1046-51. doi:*  
43 30 *<http://dx.doi.org/10.1016/j.ridd.2011.01.035>*
- 44 31  
45 32 30. Smits-Engelsman BCM, Niemeijer AS, van Waelvelde H. Is the Movement Assessment Battery for Children-  
46 2nd edition a reliable instrument to measure motor performance in 3 year old children? *Research in*  
47 33 *Developmental Disabilities 2011;32(4):1370-77.*
- 48 34  
49 35 31. Holm I, Tveter AT, Aulie VS, et al. High intra- and inter-rater chance variation of the movement assessment  
50 battery for children 2, ageband 2. *Research in Developmental Disabilities 2013;34(2):795-800.*
- 51 36  
52  
53  
54  
55  
56  
57  
58  
59  
60



- 1 32. Kita Y, Suzuki K, Hirata S, et al. Applicability of the Movement Assessment Battery for Children-Second  
2 Edition to Japanese children: A study of the Age Band 2. *Brain & Development* 2016;38(8):706-13.
- 3 33. Griffiths A, Morgan P, Anderson PJ, et al. Predictive value of the Movement Assessment Battery for  
4 Children - Second Edition at 4 years, for motor impairment at 8 years in children born preterm. *Dev Med*  
5 *Child Neurol* 2017;59(5):490-96. doi: 10.1111/dmcn.13367 [published Online First: 2017/01/10]
- 6 34. Schulz J, Henderson SE, Sugden DA, et al. Structural validity of the Movement ABC-2 test: factor structure  
7 comparisons across three age groups. *Research in Developmental Disabilities* 2011;32(4):1361-9.
- 8 35. Valentini NC, Ramalho MH, Oliveira MA. Movement assessment battery for children-2: translation,  
9 reliability, and validity for Brazilian children. *Res Dev Disabil* 2014;35(3):733-40. doi:  
10 <http://dx.doi.org/10.1016/j.ridd.2013.10.028>
- 11 36. Wang YP, Su JH, Su CY. Reliability and responsiveness of the Movement Assessment Battery for Children-  
12 Second Edition Test in children with developmental coordination disorder. *Developmental Medicine & Child*  
13 *Neurology* 2012;54(2):160-5.
- 14 37. Hands B, Larkin D, Rose E. The psychometric properties of the McCarron Assessment of Neuromuscular  
15 Development as a longitudinal measure with Australian youth. *Human Movement Science* 2013;32(3):485-  
16 97.
- 17 38. Danks M, Maideen MF, Burns YR, et al. The long-term predictive validity of early motor development in  
18 "apparently normal" ELBW survivors. *Early Human Development* 2012;88(8):637-41.
- 19 39. MacDonald J, Burns Y. Performance on the NSMDA During the First and Second Year of Life to Predict  
20 Functional Ability at the Age Of 4 in Children with Cerebral Palsy. *Hong Kong Physiotherapy Journal*  
21 2005;23(1):40-45. doi: 10.1016/S1013-7025(09)70058-2
- 22 40. Burns YR, Ensbey RM, Norrie MA. The Neuro-sensory motor developmental assessment part 1:  
23 development and administration of the test. *Aust J Physiother* 1989;35(3):141-49.
- 24 41. Burns YR, Ensbey RM, Norrie MA. The neuro-sensory motor developmental assessment part II: predictive  
25 and concurrent validity. *Aust J Physiother* 1989;35(3):151-57.
- 26 42. Barnett LM, Minto C, Lander N, et al. Interrater reliability assessment using the Test of Gross Motor  
27 Development-2. *Journal of Science and Medicine in Sport* 2014;17(6):667-70. doi:  
28 <http://dx.doi.org/10.1016/j.jsams.2013.09.013>
- 29 43. Farrokhi A, Zareh Zadeh M, Karimi Alvar L, et al. Reliability and validity of test of gross motor development-  
30 2 (Ulrich, 2000) among 3-10 aged children of Tehran City. *Journal of Physical Education and Sports*  
31 *Management* 2014;5(2):18-28. doi: 10.5897/JPEM12.003
- 32 44. Kim Y, Park I, Kang M. Examining rater effects of the TGMD-2 on children with intellectual disability.  
33 *Adapted Physical Activity Quarterly* 2012;29(4):346-65.
- 34 45. Kim CI, Han DW, Park IH. Reliability and validity of the test of gross motor development-II in Korean  
35 preschool children: applying AHP. *Research in Developmental Disabilities* 2014;35(4):800-7.
- 36 46. Wang YP, Lin YH, Su CY. Rasch analysis of the Bruininks-Oseretsky Test of Motor Proficiency-Second  
37 Edition in intellectual disabilities. *Research in Developmental Disabilities* 2009;30(6):1132-44.

- 1 47. Spittle AJ, Doyle LW, Boyd RN. A systematic review of the clinimetric properties of neuromotor  
2 assessments for preterm infants during the first year of life. *Dev Med Child Neurol* 2008;50(4):254-66. doi:  
3 10.1111/j.1469-8749.2008.02025.x [published Online First: 2008/01/15]  
4  
5 48. McDowell I. Measuring health: a guide to rating scales and questionnaires: Oxford university press 2006.  
6  
7 49. Cools W, De Martelaer K, Samaey C, et al. Movement skill assessment of typically developing preschool  
8 children: a review of seven movement skill assessment tools.(Report). *Journal of Sports Science and Medicine*  
9 2009;8(2):154.  
10  
11 50. Adair B, Said CM, Rodda J, et al. Psychometric properties of functional mobility tools in hereditary spastic  
12 paraplegia and other childhood neurological conditions. *Dev Med Child Neurol* 2012;54(7):596-605.  
13  
14  
15  
16  
17  
18  
19  
20  
21  
22  
23  
24  
25  
26  
27  
28  
29  
30  
31  
32  
33  
34  
35  
36  
37  
38  
39  
40  
41  
42  
43  
44  
45  
46  
47  
48  
49  
50  
51  
52  
53  
54  
55  
56  
57  
58  
59  
60

For peer review only

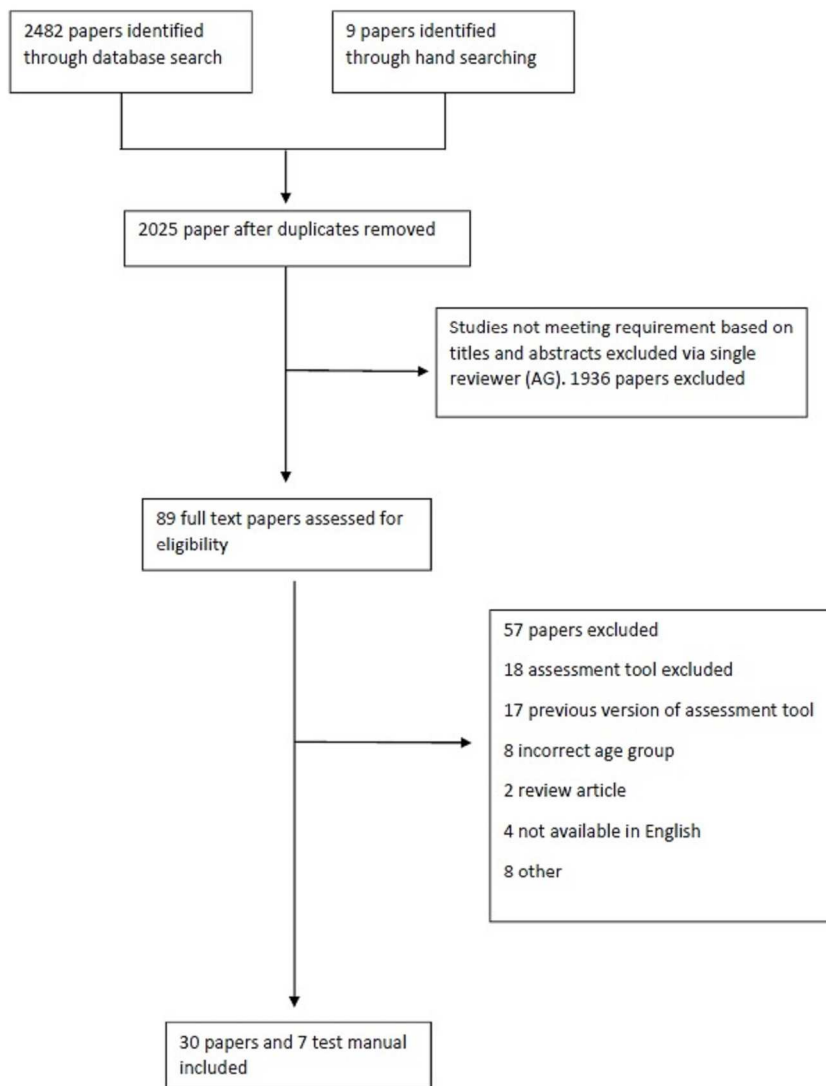

Figure 1. PRISMA flow diagram detailing study selection

195x256mm (300 x 300 DPI)

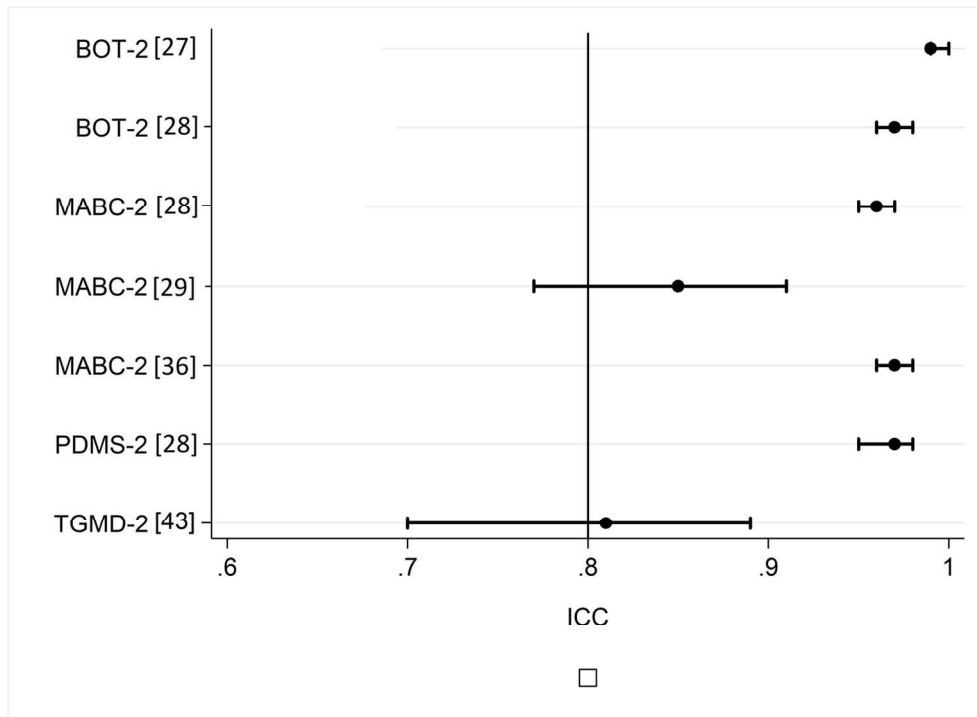

Figure 2. Test re-test reliability of gross motor assessment tools  
Figure 2 legend: BOT-2, Bruininks-Oseretsky Test of Motor Proficiency 2nd edition 13; MABC-2, Movement Assessment Battery for Children 2nd edition 14; PDMS-2, Peabody Developmental Motor Scales 2nd edition 17; TGMD-II, Test of Gross Motor Development 2nd edition 18.

139x102mm (300 x 300 DPI)

Only

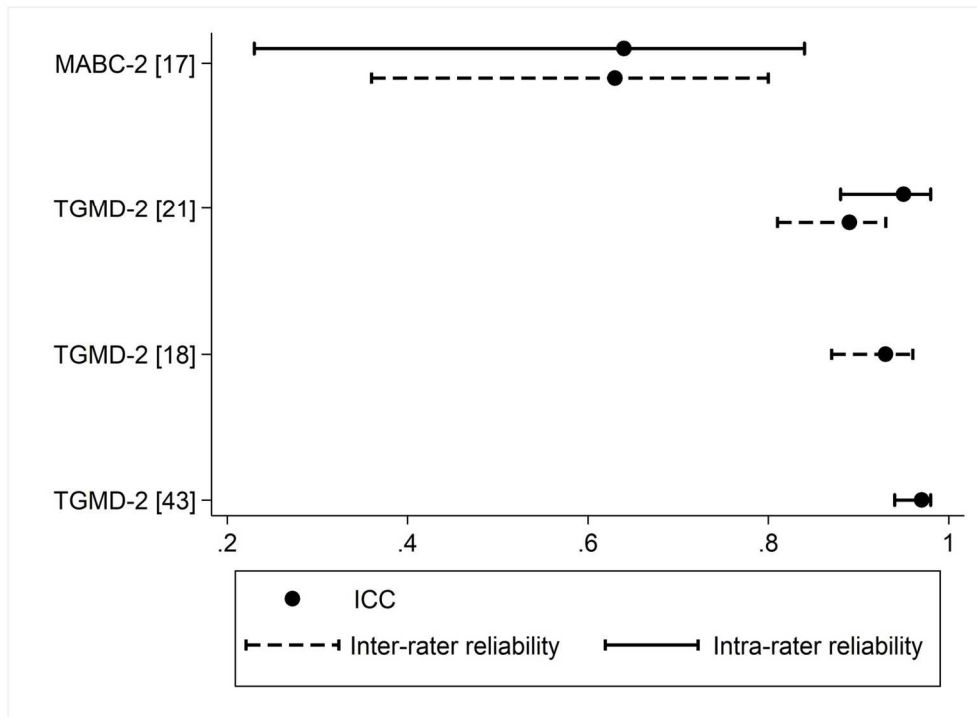

Figure 3. Inter and interrater reliability of gross motor assessment tools  
 Figure 3 legend: MABC-2, Movement Assessment Battery for Children 2nd edition 14; TGMD-II, Test of Gross Motor Development 2nd edition 18

139x102mm (300 x 300 DPI)

Supplementary Table 1. OVID Medline database search (1996 to present)

| Search No | Search                                             | Yield 5/5/17    |
|-----------|----------------------------------------------------|-----------------|
| 1         | Child/                                             | 811722          |
| 2         | Child, Preschool/                                  | 457484          |
| 3         | paediatric*.mp.                                    | 45528           |
| 4         | Motor Skills/                                      | 12726           |
| 5         | Motor Activity/                                    | 64838           |
| 6         | gross motor.mp.                                    | 3821            |
| 7         | Psychomotor Disorders/                             | 2609            |
| 8         | Motor Skills Disorders/                            | 2580            |
| 9         | Developmental Disabilities/                        | 13484           |
| 10        | developmental coordination disorder.mp.            | 845             |
| 11        | Movement/ph (physiology)                           | 22342           |
| 12        | Questionnaires/                                    | 336296          |
| 13        | "Outcome Assessment (Health Care)"/                | 57491           |
| 14        | scale*.mp.                                         | 608566          |
| 15        | instrument*.mp.                                    | 197131          |
| 16        | outcome*.mp.                                       | 1813266         |
| 17        | measure*.mp.                                       | 2255187         |
| 18        | evaluat*.mp.                                       | 2552240         |
| 19        | assess*.mp.                                        | 2273012         |
| 20        | "Task Performance and Analysis"/                   | 22017 (or 5969) |
| 21        | Reproducibility of Results"/                       | 319899          |
| 22        | 1 or 2 or 3                                        | 936097          |
| 23        | 4 or 5 or 6 or 7 or 8 or 9 or 10 or 11             | 116200          |
| 24        | 12 or 13 or 14 or 15 or 16 or 17 or 18 or 19 or 20 | 6579985         |
| 25        | 21 and 22 and 23 and 24                            | 1152            |

Supplementary table 2: CINAHL plus database search

| Search Number | Search                                                         | Yield         |
|---------------|----------------------------------------------------------------|---------------|
|               |                                                                | <b>2/7/17</b> |
| <b>S1</b>     | (MH "Child")                                                   | 338732        |
| <b>S2</b>     | (MH "Child, Preschool")                                        | 156847        |
| <b>S3</b>     | "paediatric"                                                   | 14351         |
| <b>S4</b>     | (MH "Motor Skills")                                            | 7420          |
| <b>S5</b>     | (MH "Motor Activity")                                          | 9664          |
| <b>S6</b>     | (MH "Psychomotor Performance")                                 | 9457          |
| <b>S7</b>     | (MH "Motor Skills Disorders")                                  | 1515          |
| <b>S8</b>     | (MH "Developmental Disabilities")                              | 7114          |
| <b>S9</b>     | (MH "Child Development Disorders")                             | 1708          |
| <b>S10</b>    | "gross motor"                                                  | 2234          |
| <b>S11</b>    | (MH "Clinical Assessment Tools")                               | 110291        |
| <b>S12</b>    | (MH "Outcome Assessment")                                      | 29335         |
| <b>S13</b>    | (MH Physical Therapy Assessment")                              | 2027          |
| <b>S14</b>    | "scale"                                                        | 290924        |
| <b>S15</b>    | instrument*                                                    | 113984        |
| <b>S16</b>    | outcome*                                                       | 602132        |
| <b>S17</b>    | measure*                                                       | 534465        |
| <b>S18</b>    | evaluat*                                                       | 760447        |
| <b>S19</b>    | assess*                                                        | 710533        |
| <b>S20</b>    | (MH Reliability and Validity")                                 | 11043         |
| <b>S21</b>    | S1 OR S2 OR S3                                                 | 387809        |
| <b>S22</b>    | S4 OR S5 OR S6 OR S7 OR S8 OR S9 OR S10                        | 35562         |
| <b>S23</b>    | S11 OR S12 OR S13 OR S14 OR S15 OR S16 OR S17 OR<br>S18 OR S19 | 1763829       |
| <b>S24</b>    | S20 AND S21 AND S22 AND S23                                    | 144           |

Supplementary table 3: EMBASE database search (1974-present)

| Search No | Search                                                                  | Search Yield<br>5/5/17 |
|-----------|-------------------------------------------------------------------------|------------------------|
| 1         | Child/                                                                  | 1346641                |
| 2         | Preschool child/                                                        | 457981                 |
| 3         | paediatric*.mp.                                                         | 86036                  |
| 4         | Motor performance/                                                      | 57571                  |
| 5         | Motor Activity/                                                         | 39751                  |
| 6         | psychomotor performance                                                 | 19515                  |
| 7         | Motor development/                                                      | 4906                   |
| 8         | Motor dysfunction/                                                      | 53155                  |
| 9         | Developmental disorder/                                                 | 30473                  |
| 10        | Gross motor.mp.                                                         | 6840                   |
| 11        | Outcome Assessment/                                                     | 358121                 |
| 12        | Outcome measure.mp.                                                     | 60507                  |
| 13        | Questionnaire/                                                          | 513199                 |
| 14        | Task performance/                                                       | 125167                 |
| 15        | Functional assessment/                                                  | 55415                  |
| 16        | Clinical assessment tool/                                               | 19865                  |
| 17        | evaluat*.mp.                                                            | 3874341                |
| 18        | instrument*.mp.                                                         | 515930                 |
| 19        | outcome*.mp.                                                            | 2425627                |
| 20        | Assess*.mp.                                                             | 3815907                |
| 21        | Scale*.mp.                                                              | 903216                 |
| 22        | Measure*.mp.                                                            | 3444366                |
| 23        | Measurement accuracy/                                                   | 18209                  |
| 24        | Measurement repeatability/                                              | 2849                   |
| 25        | Reproducibility/                                                        | 173988                 |
| 26        | Validity/                                                               | 40192                  |
| 27        | Reliability/                                                            | 114002                 |
| 28        | 1 or 2 or 3                                                             | 1535605                |
| 29        | 4 or 5 or 6 or 7 or 8 or 9 or 10                                        | 195237                 |
| 30        | 11 or 12 or 13 or 14 or 15 or 16 or 17 or 18 or<br>19 or 20 or 21 or 22 | 10121631               |
| 31        | 23 or 24 or 25 or 26 or 27                                              | 324779                 |
| 32        | 28 and 29 and 30 and 31                                                 | 1105                   |



Supplementary table 4. Allied and Complementary Medicine Database (AMED) database search: (1985-present)

| Search Number | Search                                                 | Yield 2/7/17 |
|---------------|--------------------------------------------------------|--------------|
| 1             | Child/                                                 | 15192        |
| 2             | Child preschool/                                       | 1223         |
| 3             | Adolescent/                                            | 3979         |
| 4             | paediatric*.mp.                                        | 812          |
| 5             | 1 or 2 or 3 or 4                                       | 18429        |
| 6             | Motor skills/                                          | 1220         |
| 7             | Motor activity/                                        | 1468         |
| 8             | Gross motor*.mp.                                       | 599          |
| 9             | Psychomotor disorders/                                 | 1067         |
| 10            | Developmental disabilities/ or motor skills disorders/ | 947          |
| 11            | Developmental coordination disorder*.mp.               | 219          |
| 12            | DCD.mp.                                                | 113          |
| 13            | 6 or 7 or 8 or 9 or 10 or 11 or 12                     | 4982         |
| 14            | 5 and 13                                               | 1510         |
| 15            | Clinical assessment scales/                            | 4318         |
| 16            | Questionnaires/                                        | 4123         |
| 17            | Disability evaluation/                                 | 7023         |
| 18            | Outcome measure*.mp/                                   | 9845         |
| 19            | Outcome*.mp.                                           | 38379        |
| 20            | Assess*.mp.                                            | 43680        |
| 21            | Scale*.mp.                                             | 17562        |
| 22            | Evaluat*.mp.                                           | 40621        |
| 23            | 15 or 16 or 17 or 18 or 19 or 20 or 21 or 22           | 93570        |
| 24            | 14 and 23                                              | 865          |
| 25            | Measurement/                                           | 1629         |
| 26            | Reproducibility of results.mp/                         | 2241         |
| 27            | "Consistency and reliability"/                         | 1898         |
| 28            | Statistics/                                            | 1075         |
| 29            | Specificity.mp.                                        | 1241         |
| 30            | Sensitivity.mp.                                        | 2860         |
| 31            | "Predictive value of tests"/                           | 839          |
| 32            | 25 or 26 or 27 or 28 or 29 or 30 or 31                 | 10256        |
| 33            | 24 and 32                                              | 81           |

Supplementary table 5: Definition of terms

|                       | Measurement Property | Definition                                                                                                                                                           | Example/explanation                                                                                                                                                                                                                                                                                                                                                                   |
|-----------------------|----------------------|----------------------------------------------------------------------------------------------------------------------------------------------------------------------|---------------------------------------------------------------------------------------------------------------------------------------------------------------------------------------------------------------------------------------------------------------------------------------------------------------------------------------------------------------------------------------|
| <b>Validity</b>       | Content              | The degree to which an assessment tool's content measures the construct that it intends to measure <sup>7</sup>                                                      | Concerned with the relevance and comprehensiveness of the items included in the assessment tool                                                                                                                                                                                                                                                                                       |
|                       | Construct            | Measures the degree to which the scores obtained from the test are an adequate reflection of the construct to be measured <sup>7</sup>                               | Examples include structural validity (whether scores reflect the dimensionality of the construct), hypothesis testing (item construct validity) and cross-cultural validity (whether translated or culturally adapted assessments adequately reflect the original version) <sup>7</sup>                                                                                               |
|                       | Criterion            | Assesses whether or not the test scores reflect a 'gold standard' assessment <sup>7</sup>                                                                            | As there is no gold standard of assessment for gross motor function in children this is often assessed with correlations of scores obtained from two or three other frequently used tools.                                                                                                                                                                                            |
| <b>Reliability</b>    | Reliability          | Refers to the consistency of a test score regardless of the time between assessments (test-retest) or the person administering (intra and inter-rater) <sup>50</sup> | Usually measured with intraclass correlation coefficient (ICC), but can be measured using Cohen's kappa coefficient. Percentage agreement and Pearson's correlation coefficient do not incorporate error into the calculations and as such is not a true measure of agreement <sup>50</sup> . Scores > 0.80 are considered excellent, 0.60-0.79 adequate and <0.59 poor <sup>11</sup> |
|                       | Internal consistency | The degree of interrelatedness of an assessment tool's items <sup>7</sup>                                                                                            | Usually measured using Cronbach's alpha ( $\alpha$ ) <sup>7</sup> . scores > 0.70 demonstrates high relationship, 0.5 to 0.69 a moderate relationship, 0.26 to 0.49 a low relationship and < 0.26 little relationship <sup>50</sup> .                                                                                                                                                 |
|                       | Measurement Error    | Refers to the error obtained between measurements that cannot be attributed to the patients true change <sup>7</sup>                                                 | May be systematic or random error <sup>7</sup>                                                                                                                                                                                                                                                                                                                                        |
| <b>Responsiveness</b> | Responsiveness       | An assessment tool's ability to detect change over time in the construct it purports to measure <sup>7</sup>                                                         | This is central to a tools capacity to be used as an outcome measure.                                                                                                                                                                                                                                                                                                                 |

## Supplementary table 6: Excluded Assessment Tools

| Reason                                      | Assessments                                                                                                                                                                                                                         |
|---------------------------------------------|-------------------------------------------------------------------------------------------------------------------------------------------------------------------------------------------------------------------------------------|
| Manual not available in English             | Maastricht's Motor Test (MMT)<br>The Motor-Proficiency-Test for children between 4 and 6 years of age (MOT 4-6)<br>Zuk Assessment<br>Körperkoordinationstest für Kinder (KTK)                                                       |
| Cannot extract meaningful gross motor score | Early Intervention Developmental Profile (EIDP)<br>Neurological Developmental Exam<br>Preschooler Gross Motor Quality Scale (PGMQ)<br>The Malawi Developmental Assessment Tool (MDAT)<br>Dutch table tennis motor skills assessment |
| Screening Tool                              | Brief Assessment of Motor Function (BAMF)<br>The Motor Performance Checklist<br>Motor skill checklist (MSC)                                                                                                                         |
| Diagnosis specific/requires a diagnosis     | Assessment Battery for the Atypical Handicapped Child (VAB)<br>Video-based documentation and rating system of the motor behaviour of handicapped children                                                                           |
| Only assesses one motor domain (e.g. gait)  | Standardized Walking Obstacle Course (SWOC)<br>Timed floor to stand test                                                                                                                                                            |
| Manual not published/commercially available | Rapid Neurodevelopmental Assessment (RNDA)<br>Tufts Assessment of Motor Performance (TAMP)<br>Zurich Neuromotor Assessment (ZNA)                                                                                                    |

Supplementary table 7: Scoring and administration of assessment tools

| Assessment Tool                 | Scoring                                                                                                                                                    | Interpretation of scores                                                                                                           | Other                                                                                                            |
|---------------------------------|------------------------------------------------------------------------------------------------------------------------------------------------------------|------------------------------------------------------------------------------------------------------------------------------------|------------------------------------------------------------------------------------------------------------------|
| <b>Bayley-III</b> <sup>12</sup> | Motor score - gross (varying items) and fine motor (varying items) subscales. Binary score with reverse/discontinue rules                                  | Raw scores Composite scores Centile ranks Age equivalents Growth scores                                                            | Lends itself to multidisciplinary team testing.                                                                  |
| <b>BOT-2</b> <sup>13</sup>      | Fine manual (15 items) manual coordination (12 items) body coordination (16 items) strength and agility (10 items) subscales. Scoring differs for subtests | Raw scores Age adjusted standard scores Composite scores Centile ranks Age equivalents Descriptive categories. Complex conversions | Administration Easel includes instructions, diagrams and photos of test procedure                                |
| <b>MABC-2</b> <sup>14</sup>     | Manual dexterity (3 items), aiming & catching (2 items) and balance (3 items) subscales.                                                                   | Raw scores component scores centile ranks total test score traffic light system. Simple conversion                                 | Also Available: MABC-2 Checklist (screening tool) and intervention manual                                        |
| <b>MAND</b> <sup>15</sup>       | Fine motor (5 items) Gross motor (5 items)                                                                                                                 | Raw scores Scaled scores converted to an NDI. Factor scores. Complex conversions                                                   | Case studies included in manual for hyperactivity, encephalitis, mild head trauma, CP and muscular dystrophy     |
| <b>NSMDA</b> <sup>16</sup>      | Functional grade given for each subscale, which is combined to create an overall score.                                                                    | Indicates: normal range, minimal dysfunction, mild problems, moderate, severe or profound disability                               | Sections for comment on strengths, behavioural state during testing, musculoskeletal system and recommendations. |
| <b>PDMS-2</b> <sup>17</sup>     | GM: Stationary (30 items), locomotion (89 items), object manipulation (24 item). FM: grasping(26 items) , visual-motor integration (72 items)              | Raw scores, Age equivalent, centile rank. Standard scores (subtests) Composite quotient. Complex conversions.                      | Motor activities program (intervention ideas)                                                                    |
| <b>TGMD-2</b> <sup>18</sup>     | Locomotion (6 items) and Object Control (6 items). Separate male/female norms for object control subset                                                    | Raw scores, standard scores, percentile rank, age equivalent, Gross Motor Quotient. Simple conversion.                             | Simple to administer                                                                                             |

Bayley-III, Bayley Scale of Infant and Toddler Development 3<sup>rd</sup> edition <sup>12</sup>; BOT-2, Bruininks-Oseretsky Test of Motor Proficiency 2<sup>nd</sup> edition <sup>13</sup>; MABC-2, Movement Assessment Battery for Children 2<sup>nd</sup> edition <sup>14</sup>; MAND, McCarron Assessment of Neuromuscular Development <sup>15</sup>; NSMDA, Neurological Sensory Motor Developmental Assessment <sup>16</sup>; PDMS-2, Peabody Developmental Motor Scales 2<sup>nd</sup> edition <sup>17</sup>; TGMD-II, Test of Gross Motor Development 2<sup>nd</sup> edition <sup>18</sup>; GM, Gross Motor; FM, Fine Motor; NDI, Neurodevelopmental Index

1  
2  
3  
4  
5  
6  
7  
8  
9  
10  
11  
12  
13  
14  
15  
16  
17  
18  
19  
20  
21  
22  
23  
24  
25  
26  
27  
28  
29  
30  
31  
32  
33  
34  
35  
36  
37  
38  
39  
40  
41  
42  
43  
44  
45  
46  
47  
48  
49  
50  
51  
52  
53  
54  
55  
56  
57  
58  
59  
60

For peer review only

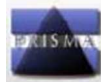

# PRISMA 2009 Checklist

| Section/topic                      | #  | Checklist item                                                                                                                                                                                                                                                                                              | Reported on page #           |
|------------------------------------|----|-------------------------------------------------------------------------------------------------------------------------------------------------------------------------------------------------------------------------------------------------------------------------------------------------------------|------------------------------|
| <b>TITLE</b>                       |    |                                                                                                                                                                                                                                                                                                             |                              |
| Title                              | 1  | Identify the report as a systematic review, meta-analysis, or both.                                                                                                                                                                                                                                         | 1 Title page                 |
| <b>ABSTRACT</b>                    |    |                                                                                                                                                                                                                                                                                                             |                              |
| Structured summary                 | 2  | Provide a structured summary including, as applicable: background; objectives; data sources; study eligibility criteria, participants, and interventions; study appraisal and synthesis methods; results; limitations; conclusions and implications of key findings; systematic review registration number. | 2                            |
| <b>INTRODUCTION</b>                |    |                                                                                                                                                                                                                                                                                                             |                              |
| Rationale                          | 3  | Describe the rationale for the review in the context of what is already known.                                                                                                                                                                                                                              | 4-5                          |
| Objectives                         | 4  | Provide an explicit statement of questions being addressed with reference to participants, interventions, comparisons, outcomes, and study design (PICOS).                                                                                                                                                  | 5                            |
| <b>METHODS</b>                     |    |                                                                                                                                                                                                                                                                                                             |                              |
| Protocol and registration          | 5  | Indicate if a review protocol exists, if and where it can be accessed (e.g., Web address), and, if available, provide registration information including registration number.                                                                                                                               | -                            |
| Eligibility criteria               | 6  | Specify study characteristics (e.g., PICOS, length of follow-up) and report characteristics (e.g., years considered, language, publication status) used as criteria for eligibility, giving rationale.                                                                                                      | 5-6                          |
| Information sources                | 7  | Describe all information sources (e.g., databases with dates of coverage, contact with study authors to identify additional studies) in the search and date last searched.                                                                                                                                  | 5                            |
| Search                             | 8  | Present full electronic search strategy for at least one database, including any limits used, such that it could be repeated.                                                                                                                                                                               | 5 and supplementary tables 2 |
| Study selection                    | 9  | State the process for selecting studies (i.e., screening, eligibility, included in systematic review, and, if applicable, included in the meta-analysis).                                                                                                                                                   | 5-6                          |
| Data collection process            | 10 | Describe method of data extraction from reports (e.g., piloted forms, independently, in duplicate) and any processes for obtaining and confirming data from investigators.                                                                                                                                  | 6                            |
| Data items                         | 11 | List and define all variables for which data were sought (e.g., PICOS, funding sources) and any assumptions and simplifications made.                                                                                                                                                                       | 6-7                          |
| Risk of bias in individual studies | 12 | Describe methods used for assessing risk of bias of individual studies (including specification of whether this was done at the study or outcome level), and how this information is to be used in any data synthesis.                                                                                      | 6                            |
| Summary measures                   | 13 | State the principal summary measures (e.g., risk ratio, difference in means).                                                                                                                                                                                                                               | 7                            |

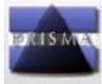

# PRISMA 2009 Checklist

|                      |    |                                                                                                                                                           |   |
|----------------------|----|-----------------------------------------------------------------------------------------------------------------------------------------------------------|---|
| Synthesis of results | 14 | Describe the methods of handling data and combining results of studies, if done, including measures of consistency (e.g., $I^2$ ) for each meta-analysis. | - |
|----------------------|----|-----------------------------------------------------------------------------------------------------------------------------------------------------------|---|

Page 1 of 2

| Section/topic                 | #  | Checklist item                                                                                                                                                                                           | Reported on page #                                                                                  |
|-------------------------------|----|----------------------------------------------------------------------------------------------------------------------------------------------------------------------------------------------------------|-----------------------------------------------------------------------------------------------------|
| Risk of bias across studies   | 15 | Specify any assessment of risk of bias that may affect the cumulative evidence (e.g., publication bias, selective reporting within studies).                                                             | 24, 25                                                                                              |
| Additional analyses           | 16 | Describe methods of additional analyses (e.g., sensitivity or subgroup analyses, meta-regression), if done, indicating which were pre-specified.                                                         | -                                                                                                   |
| <b>RESULTS</b>                |    |                                                                                                                                                                                                          |                                                                                                     |
| Study selection               | 17 | Give numbers of studies screened, assessed for eligibility, and included in the review, with reasons for exclusions at each stage, ideally with a flow diagram.                                          | Figure 1 + page 7                                                                                   |
| Study characteristics         | 18 | For each study, present characteristics for which data were extracted (e.g., study size, PICOS, follow-up period) and provide the citations.                                                             | Table 1 – page 9 + Suppl table 3                                                                    |
| Risk of bias within studies   | 19 | Present data on risk of bias of each study and, if available, any outcome level assessment (see item 12).                                                                                                | 11 + Table 3 – page 14-15                                                                           |
| Results of individual studies | 20 | For all outcomes considered (benefits or harms), present, for each study: (a) simple summary data for each intervention group (b) effect estimates and confidence intervals, ideally with a forest plot. | 7-8, 11-12, 17 + Table 2 page 13, Table 4 page 18, Table 5 page 19, Table 6 page 20 + Figures 2 & 3 |
| Synthesis of results          | 21 | Present results of each meta-analysis done, including confidence intervals and measures of consistency.                                                                                                  | -                                                                                                   |
| Risk of bias across studies   | 22 | Present results of any assessment of risk of bias across studies (see Item 15).                                                                                                                          | -                                                                                                   |
| Additional analysis           | 23 | Give results of additional analyses, if done (e.g. sensitivity or subgroup analyses, meta-regression [see Item 16]).                                                                                     | -                                                                                                   |

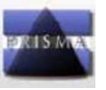

# PRISMA 2009 Checklist

1  
2  
3  
4  
5  
6  
7  
8  
9  
10  
11  
12  
13  
14  
15  
16  
17  
18  
19  
20  
21  
22  
23  
24  
25  
26  
27  
28  
29  
30  
31  
32  
33  
34  
35  
36  
37  
38  
39  
40  
41  
42  
43  
44  
45  
46  
47

|                     |    |                                                                                                                                                                                      |       |
|---------------------|----|--------------------------------------------------------------------------------------------------------------------------------------------------------------------------------------|-------|
| <b>DISCUSSION</b>   |    |                                                                                                                                                                                      |       |
| Summary of evidence | 24 | Summarize the main findings including the strength of evidence for each main outcome; consider their relevance to key groups (e.g., healthcare providers, users, and policy makers). | 22-24 |
| Limitations         | 25 | Discuss limitations at study and outcome level (e.g., risk of bias), and at review-level (e.g., incomplete retrieval of identified research, reporting bias).                        | 24    |
| Conclusions         | 26 | Provide a general interpretation of the results in the context of other evidence, and implications for future research.                                                              | 25-26 |
| <b>FUNDING</b>      |    |                                                                                                                                                                                      |       |
| Funding             | 27 | Describe sources of funding for the systematic review and other support (e.g., supply of data); role of funders for the systematic review.                                           | 1     |

From: Moher D, Liberati A, Tetzlaff J, Altman DG, The PRISMA Group (2009). Preferred Reporting Items for Systematic Reviews and Meta-Analyses: The PRISMA Statement. PLoS Med 6(7): e1000097. doi:10.1371/journal.pmed1000097

For more information, visit: [www.prisma-statement.org](http://www.prisma-statement.org).



# BMJ Open

## Psychometric properties of gross motor assessment tools for children: a systematic review

|                                 |                                                                                                                                                                                                                                                                                                                                                                                                                                            |
|---------------------------------|--------------------------------------------------------------------------------------------------------------------------------------------------------------------------------------------------------------------------------------------------------------------------------------------------------------------------------------------------------------------------------------------------------------------------------------------|
| Journal:                        | <i>BMJ Open</i>                                                                                                                                                                                                                                                                                                                                                                                                                            |
| Manuscript ID                   | bmjopen-2018-021734.R2                                                                                                                                                                                                                                                                                                                                                                                                                     |
| Article Type:                   | Research                                                                                                                                                                                                                                                                                                                                                                                                                                   |
| Date Submitted by the Author:   | 23-Aug-2018                                                                                                                                                                                                                                                                                                                                                                                                                                |
| Complete List of Authors:       | Griffiths, Alison; Monash University, Physiotherapy; The Royal Children's Hospital, Physiotherapy<br>Toovey, Rachel; Murdoch Childrens Research Institute, Developmental Disability and Rehabilitation Research; University of Melbourne, Physiotherapy<br>Morgan, Prue; Monash University, Physiotherapy<br>Spittle, Alicia; University of Melbourne, Physiotherapy; Murdoch Childrens Research Institute, Victorian Infant Brain Studies |
| <b>Primary Subject Heading</b>: | Paediatrics                                                                                                                                                                                                                                                                                                                                                                                                                                |
| Secondary Subject Heading:      | Rehabilitation medicine                                                                                                                                                                                                                                                                                                                                                                                                                    |
| Keywords:                       | PAEDIATRICS, REHABILITATION MEDICINE, validity, gross motor assessment, reliability                                                                                                                                                                                                                                                                                                                                                        |
|                                 |                                                                                                                                                                                                                                                                                                                                                                                                                                            |

SCHOLARONE™  
Manuscripts

Only

# Psychometric properties of gross motor assessment tools for children: a systematic review

Alison Griffiths<sup>1,2,3</sup>, Rachel Toovey<sup>3,4</sup>, Prue E. Morgan<sup>1</sup>, Alicia J. Spittle<sup>3,4</sup>

1. Department of Physiotherapy, School of Primary and Allied Health Care, Monash University, Frankston, Victoria, Australia

2. Department of Physiotherapy, The Royal Children's Hospital, Parkville, Victoria, Australia

3. Murdoch Children's Research Institute, Parkville, Victoria, Australia

4. Department of Physiotherapy, The University of Melbourne, Parkville, Victoria, Australia

## Corresponding Author:

Name: A/Prof Alicia J. Spittle

Address: Department of Physiotherapy, The University of Melbourne, Level 7 Alan Gilbert Building, 161 Barry Street, Parkville, Vic 3010, Australia

Email: [aspittle@unimelb.edu.au](mailto:aspittle@unimelb.edu.au)

**Funding:** This study was part-funded by grants from the National Health and Medical Research Council Career Development Fellowship (AJS) 1053767 and Centre of Research Excellence in Newborn Medicine 1060733 (AJS and AG) and the Victorian Government's Operational Infrastructure Support Program.

**Financial disclosure:** The authors have declared that they have no financial relationships relevant to this article.

**Conflict of interest:** The authors have no conflict of interest.

**Keywords:** paediatrics, reliability, validity, rehabilitation medicine, gross motor assessment

# Abstract

## Objective:

Gross motor assessment tools have a critical role in identifying, diagnosing and evaluating motor difficulties in childhood. The objective of this review was to systematically evaluate the psychometric properties and clinical utility of gross motor assessment tools for children 2-12 years.

## Method:

A systematic search of MEDLINE, Embase, CINAHL and AMED was performed between May and July 2017. Methodological quality was assessed with the COnsensus-based Standards for the selection of health status Measurement INstruments (COSMIN) checklist and an outcome measures rating form was used to evaluate reliability, validity and clinical utility of assessment tools.

## Results:

Seven assessment tools from 37 studies/manuals met the inclusion criteria: Bayley Scale of Infant and Toddler Development-III (Bayley-III), Bruininks-Oseretsky Test of Motor Proficiency-2 (BOT-2), Movement Assessment Battery for Children-2 (MABC-2), McCarron Assessment of Neuromuscular Development (MAND), Neurological Sensory Motor Developmental Assessment (NSMDA), Peabody Developmental Motor Scales-2 (PDMS-2) and Test of Gross Motor Development-2 (TGMD-2). Methodological quality varied from poor to excellent. Validity and internal consistency varied from fair to excellent ( $\alpha$  0.5-0.99). The Bayley-III, NSMDA and MABC-2 have evidence of predictive validity. Test re-test reliability is excellent in the BOT-2 (ICC=0.80-0.99), PDMS-2 (ICC=0.97), MABC-2 (ICC=0.83-0.96) and TGMD-2 (ICC=0.81-0.92). TGMD-2 has the highest interrater (ICC 0.88-0.93) and intrarater reliability (ICC=0.92-0.99).

## Conclusions:

The majority of gross motor assessments for children have good-excellent validity. Test-retest reliability is highest in the BOT-2, MABC-2, PDMS-2 and TGMD-2. The Bayley-III has the best predictive validity at 2 years of age for later motor outcome. None of the

1 assessment tools demonstrate good evaluative validity. Further research on evaluative gross  
2 motor assessment tools are urgently needed.

### 3 Strengths and limitations of this study

- 4 • This systematic review comprehensively assesses methodological quality of included  
5 studies using the COSMIN checklist.
- 6 • Results of this systematic review can provide guidance to clinicians when choosing  
7 gross motor assessment tools based on test psychometric properties and clinical  
8 utility.
- 9 • Areas for future research are identified including improving the evidence of inter and  
10 intrarater reliability and responsiveness to change as well as the ascertainment of  
11 predictive validity over a longer period of time.
- 12 • Only articles or test manuals written in English were included.
- 13 • Only one reviewer screened titles and abstracts for inclusion

## 1 Introduction

2 Motor function promotes cognitive and perceptual development in children and contributes  
3 to their ability to participate in their home, school and community environments<sup>1</sup>. Motor  
4 impairment can negatively affect activity and participation levels of children<sup>2</sup>, which may  
5 lead to lower levels of physical activity, fitness and health into adulthood<sup>3</sup>. While severe  
6 motor deficits are usually diagnosed before 2 years of age, mild motor deficits may not  
7 become evident until children are in preschool and primary school environments where  
8 they are exposed to increasingly complex tasks and compared to their peers<sup>3</sup>. Identification  
9 of motor difficulties is an important step towards support and intervention for the child and  
10 their family.

11 Healthcare professionals and researchers require standardised assessment tools to identify,  
12 classify and diagnose motor problems in children<sup>4</sup>. Further, assessment tools are essential  
13 to monitor the effects of interventions<sup>4</sup>. There is no gold standard of motor assessment for  
14 children and the available tests vary in their ease of use and interpretability in clinical and  
15 research settings, and whether they are norm or criterion referenced<sup>5</sup>. Criterion referenced  
16 tests are designed to be scored as items or criteria are demonstrated; meaning that the  
17 score is a reflection of a child's competence on the test items. Most available assessments  
18 however, are norm referenced, meaning that a child's results are reported in relation to a  
19 specific population<sup>4</sup>. The characteristics of the normed population should be taken into  
20 consideration when interpreting test results as environmental and cultural differences have  
21 been found to affect motor development<sup>6</sup>.

22 Health professionals should be aware of the validity and reliability of assessment tools to  
23 assist in their instrument selection and interpretation of results. Validity refers to "The  
24 degree to which [an instrument] is an adequate reflection of the construct to be measured"  
25<sup>7</sup>. If an instrument does not have adequate construct or content validity then it may not be  
26 assessing the skills that it purports to. Reliability refers to "the degree to which the  
27 measurement is free from measurement error"<sup>7</sup>, which is significant when interpreting  
28 results. If a child is assessed as being significantly delayed in their gross motor skills, the  
29 reliability of that tool indicates the likelihood that a result is due to error.

1  
2  
3 1 A systematic review in 2010 by Slater<sup>8</sup> evaluated performance-based gross motor tests for  
4 2 children with developmental coordination disorder, however it did not include the second  
5 3 and most recent version of the Movement Assessment Battery for Children 2 (MABC-2),  
6 4 which is widely used. Brown and Lalor<sup>9</sup> suggested that as a result of the changes to the  
7 5 original Movement Assessment Battery for Children (MABC) in age range, age bands,  
8 6 materials and tasks, that the MABC-2 requires independent reliability and validity  
9 7 assessment. Over the past eight years there has also been a significant increase in the  
10 8 number of papers assessing the psychometric properties of motor assessment tools in  
11 9 children. A systematic review of these and previous papers is warranted, in order to add to  
12 10 our understanding of the psychometrics of standardised gross motor assessment tools.

13  
14  
15  
16  
17  
18  
19  
20  
21 11 The primary aim of this systematic review is to identify and evaluate the clinical utility and  
22 12 psychometric properties of gross motor assessment tools appropriate for use in preschool  
23 13 and school age children from 2-12 years by assessing the methodological quality of the  
24 14 included studies. The secondary aim of this review is to identify any areas for further  
25 15 research.

## 16 Method

17 A comprehensive search strategy was completed in databases OVID Medline (1996 to May  
18 2017), CINAHL plus (1937 to July 2017), Embase (1974 – May 2017) and AMED (1985 – July  
19 2017) (Supplementary tables 1-4). The search strategy used MeSH terms and text words for  
20 ('child' or 'paediatric') and ('motor skills' or 'motor activity' or 'gross motor' or  
21 'psychomotor' or 'developmental coordination disorder') and ('questionnaires' or 'outcome  
22 assessment' or 'instrument' or 'task performance') and ('reliability' or 'validity' or  
23 'psychometrics'). Reference lists of included articles were also screened to identify any  
24 additional papers. If full texts were unavailable or further information required regarding  
25 availability of manuals authors were contacted.

26 Assessment tools were included if they were 1. Discriminative, predictive or evaluative of  
27 gross motor skills, 2. Assessed  $\geq$  two gross motor (e.g. balance, jumping etc.) items, 3. Able  
28 to extract a meaningful gross motor sub-score, 4. Applicable to children 2-12 years of age, 5.

1  
2  
3 1 Criterion or norm referenced test with a standardised assessment procedure and 6.  
4 2 Instructional manuals are published or commercially available.  
5  
6  
7 3 Articles describing use of the assessment tool were included if;  $\geq 90\%$  of the study  
8 4 population were within 2-12 years of age, it was available in English and if validity and/or  
9 5 reliability of the assessment tool was reported.  
10  
11  
12  
13 6 Assessment tools were excluded if they met any of the following criteria 1. Questionnaires  
14 7 or screening tools, 2. Only applicable to children with a specific diagnosis (e.g. cerebral  
15 8 palsy, Down's syndrome), 3. Test manuals not available in English and 4. The version of the  
16 9 test has been superseded.  
17  
18  
19  
20  
21 10 Titles and abstracts were screened by the first author with any studies that clearly did not  
22 11 meet inclusion criteria excluded. The remaining papers were obtained in full text and  
23 12 reviewed by two authors (AG, RT or PM) with selection based on inclusion and exclusion  
24 13 criteria. Papers and assessment tools were included after agreement by both raters, with  
25 14 conflicting decisions discussed until a consensus was reached.  
26  
27  
28  
29  
30 15 Methodological assessment of the papers was completed using the four-point scale of the  
31 16 COnsensus-based Standards for the selection of health status Measurement INstruments  
32 17 (COSMIN) checklist<sup>10</sup>. The COSMIN incorporates three quality domains: Validity, Reliability  
33 18 and Responsiveness consisting of seven measurement properties: content, construct and  
34 19 criterion validity, internal consistency, reliability, measurement error and responsiveness<sup>7</sup>  
35 20 (Supplementary Table 5). Cross-cultural validity, structural validity and hypothesis testing  
36 21 are all considered to be a component of construct validity<sup>7</sup>. Whilst predictive validity is  
37 22 considered to be a component of content validity, it is reported on separately in this paper  
38 23 for interpretability of results<sup>7</sup>.  
39  
40  
41  
42  
43  
44  
45  
46 24 The overall score for each measurement property on the COSMIN checklist is determined by  
47 25 a 'worse score counts' approach<sup>10</sup>. Each property is rated as excellent, good, fair or poor  
48 26 methodological quality based on descriptive criteria. Data extraction and assessment of  
49 27 methodological quality was performed independently by two assessors (AG and RT). In the  
50 28 case of any uncertainty a third reviewer (AS) performed a COSMIN assessment and  
51 29 disagreement was resolved through discussion.  
52  
53  
54  
55  
56  
57  
58  
59  
60

1  
2  
3 1 A data extraction form for each assessment tool was adapted from the CanChild Outcome  
4 2 Measures Rating Form to collate information on clinical utility, validity, reliability and  
5 3 responsiveness<sup>11</sup>. Items chosen to represent the clinical utility of the assessment tools were  
6 4 the cost of manuals, kits, training requirements, time to administer the assessment and the  
7 5 ease of scoring. All reported values for reliability were collected, however, only those papers  
8 6 reporting intraclass Correlation Coefficient (ICC) were directly compared.

13  
14 7 Patient and Public Involvement

15  
16 8 As this was a systematic review of existing papers there was no patients or public involvement.

## 19 20 21 9 Results

22  
23 10 Figure 1 provides details of study selection. Seven assessment tools were identified for  
24 11 inclusion; Bayley Scale of Infant and Toddler Development III (Bayley-III), Bruininks-  
25 12 Oseretsky Test of Motor Proficiency 2 (BOT-2), Movement Assessment Battery for Children 2  
26 13 (MABC-2), McCarron Assessment of Neuromuscular Development (MAND), Neurological  
27 14 Sensory Motor Developmental Assessment (NSMDA), Peabody Developmental Motor Scales  
28 15 2 (PDMS-2), and Test of Gross Motor Development 2 (TGMD-2). The corresponding manuals  
29 16 were then added to the final yield resulting in thirty papers and seven manuals. Twenty  
30 17 assessment tools were excluded (Supplementary Table 6).

31  
32  
33  
34  
35  
36  
37  
38 18 The majority of assessment tools identified in this review are discriminative and most lend  
39 19 themselves towards use in a research setting. All norm referenced tools are from western  
40 20 countries and each identified test covers a different age range as shown in Table 1.

41  
42  
43  
44 21 The TGMD-2 is the only tool that assesses gross motor skills in isolation and that focusses on  
45 22 quality of performance. The other gross motor assessments were either in conjunction with  
46 23 assessment of fine motor and/or balance (MAND, MABC-2, BOT-2 and PDMS-2) or as a  
47 24 component of a developmental assessment (NSMDA, Bayley-III).

48  
49  
50  
51 25 Despite the variability in test structures, there is some consistency of items included within  
52 26 the gross motor skill subsets between tests. Most include a locomotion task such as walking,  
53 27 running or stair climbing; an object control or manipulation task such as throwing or



1  
2  
3 1 catching a ball; and a static or dynamic balance task such as standing on one leg or hopping.  
4 2 The PDMS-2, BOT-2 and the MAND also include strength assessments (the PDMS-2 only in  
5 3 some age groups).  
6  
7  
8 4 The number of gross motor items for assessment vary both within and between the tools  
9 5 (Table 1). For example, the number of items tested in the Bayley-III and the PDMS-2  
10 6 depends on the age and ability of the child. Several assessments report criteria for  
11 7 describing gross motor delay, although all test manuals warn against diagnosing delay based  
12 8 on a single assessment.  
13  
14  
15  
16  
17  
18  
19  
20  
21  
22  
23  
24  
25  
26  
27  
28  
29  
30  
31  
32  
33  
34  
35  
36  
37  
38  
39  
40  
41  
42  
43  
44  
45  
46  
47  
48  
49  
50  
51  
52  
53  
54  
55  
56  
57  
58  
59  
60

Table 1. Gross Motor Assessment Tool Characteristics

| Assessment Tool                 | Domains Tested                                                                                             | Gross motor components tested                                                                                                                          | Age range      | Diagnostic criteria                                                                                       | Primary purpose              | Secondary purpose                     | Type of test | Normative sample (year)                  |
|---------------------------------|------------------------------------------------------------------------------------------------------------|--------------------------------------------------------------------------------------------------------------------------------------------------------|----------------|-----------------------------------------------------------------------------------------------------------|------------------------------|---------------------------------------|--------------|------------------------------------------|
| <b>Bayley-III</b> <sup>12</sup> | Gross motor, fine motor, cognitive, communication, social/emotional, adaptive                              | Static postures, dynamic movement, balance                                                                                                             | 1 mth – 3 yrs  | Developmental delay: <25th centile or below 2SD. *                                                        | Discriminative               | Predictive, Evaluative, Research tool | Norm         | 1700 children from the USA (2000)        |
| <b>BOT-2</b> <sup>13</sup>      | Gross motor, fine motor                                                                                    | Coordination, balance, running speed and agility, strength                                                                                             | 4 – 21 yrs     | *                                                                                                         | Discriminative<br>Evaluative | Research tool                         | Norm         | 1520 children from the USA (2005)        |
| <b>MABC-2</b> <sup>14</sup>     | Gross motor, fine motor, balance                                                                           | Aiming and catching, static and dynamic balance                                                                                                        | 3 – 16 yrs     | Traffic light system: Green = normal, amber = 'at risk' and red = definite motor impairment (<15%). *     | Discriminative<br>Evaluative | Intervention planning, Research tool  | Norm         | 1172 children from United Kingdom (2006) |
| <b>MAND</b> <sup>15</sup>       | Gross and fine motor                                                                                       | Coordination, jumping, static and dynamic balance                                                                                                      | 3 yrs – 25 yrs | NDI 70-85 = mild<br>55-69 = moderate<br><55 = severe disability *                                         | Evaluative                   | Research tool                         | Norm         | 2000 3-35 yrs from the USA (1970's)      |
| <b>NSMDA</b> <sup>16</sup>      | Gross Motor, Fine Motor, Neurological, Postural Development, Infant Patterns of Movement, Sensory Motor. † | Sitting, kneeling, walking, balance, running, hopping, jumping, catching, motor planning                                                               | 1 mth – 6 yrs  | Total score 6-8 normal, 9-11 minimal, 12-14 mild, 15-19 moderate, 20-25 severe, >25 profound disability * | Evaluative<br>Discriminative | Predictive, Research tool             | Criterion    | N/A                                      |
| <b>PDMS-2</b> <sup>17</sup>     | Gross motor, fine motor                                                                                    | Stationary (standing balance, sit-ups, push-ups), locomotion (walking, running, jumping, hopping, etc.), object manipulation (kick, throw, hit, catch) | Birth – 5 yrs  | *                                                                                                         | Discriminative<br>Evaluative | Predictive, Research tool             | Norm         | 2003 USA and Canada (1997-8)             |

|   |                             |             |                                                                                                                    |            |   |                           |                                                       |      |                               |
|---|-----------------------------|-------------|--------------------------------------------------------------------------------------------------------------------|------------|---|---------------------------|-------------------------------------------------------|------|-------------------------------|
| 1 |                             |             |                                                                                                                    |            |   |                           |                                                       |      |                               |
| 2 |                             |             |                                                                                                                    |            |   |                           |                                                       |      |                               |
| 3 |                             |             |                                                                                                                    |            |   |                           |                                                       |      |                               |
| 4 |                             |             |                                                                                                                    |            |   |                           |                                                       |      |                               |
| 5 | <b>TGMD-2</b> <sup>18</sup> | Gross Motor | Locomotion (run, gallop, hop, leap, jump, slide) and Object control (batting, dribbling, catch, kick, throw, roll) | 3 – 10 yrs | * | Discriminative Evaluative | Outcome measure, research tool, intervention planning | Norm | 1208 USA children (1997-1998) |
| 6 |                             |             |                                                                                                                    |            |   |                           |                                                       |      |                               |
| 7 |                             |             |                                                                                                                    |            |   |                           |                                                       |      |                               |
| 8 |                             |             |                                                                                                                    |            |   |                           |                                                       |      |                               |
| 9 |                             |             |                                                                                                                    |            |   |                           |                                                       |      |                               |

10 Bayley-III, Bayley Scale of Infant and Toddler Development 3<sup>rd</sup> edition;<sup>12</sup> BOT-2, Bruininks-Oseretsky Test of Motor Proficiency 2<sup>nd</sup> edition;<sup>13</sup> MABC-2, Movement Assessment Battery for  
 11 Children 2<sup>nd</sup> edition;<sup>14</sup> MAND, McCarron Assessment of Neuromuscular Development;<sup>15</sup> NSMDA, Neurological Sensory Motor Developmental Assessment;<sup>16</sup> PDMS-2, Peabody Developmental  
 12 Motor Scales 2<sup>nd</sup> edition;<sup>17</sup> TGMD-II, Test of Gross Motor Development 2<sup>nd</sup> edition;<sup>18</sup> NDI, Neurodevelopmental Index; SD, Standard Deviation; mth, month; yrs, years \*, Advisable to use  
 13 clinical reasoning; †, requires some manual handling; USA, United States of America

1  
2  
3 1 The PDMS-2 is notable for the inclusion of credit towards incomplete skills in the scoring system.  
4 2 Most other tests award a point or credit towards a skill only if it is demonstrated to the full  
5 3 satisfaction of the stated criteria (score of 0 or 1). The PDMS-2 however is scored 0-2 allowing for 1  
6 7 mark to be allocated as a child progresses towards a skill without mastering it. The TGMD-2 is also  
7 8 notable for its marking system, in which points are awarded for the quality of the action performed,  
8 9 instead of satisfactory completion of the task only. These actions include preparatory movements  
9 10 prior to running and jumping, or arm position during movements. The NSMDA marking criteria is  
10 11 somewhat more complicated with a system of scores 1-4 with a symbol of “+” denoting hyperactive  
11 12 response and “-” a hyporeactive response. The PDMS-2, MABC-2, BOT-2, MAND, TGMD-2 and  
12 13 Bayley-III all require raw scores to be converted to a standard (or scaled) score based on tables  
13 14 supplied in the manuals. For the BOT-2 this is a multiple step process which can then be converted to  
14 15 both sex-specific or combined standard scores and percentile ranks. A summary of assessment tool  
15 16 characteristics can be found in Table 1.  
16 17  
17 18  
18 19  
19 20  
20 21  
21 22  
22 23  
23 24  
24 25  
25 26

#### 26 14 Clinical Utility

27 15 The clinical utility of the assessment tools is summarised in Table 2, while scoring and administration  
28 16 is detailed in Supplementary Table 7. The shortest administration time is 15-20 minutes for the  
29 17 TGMD-2 and the MAND; whilst most manuals report 20-60 minutes is required to complete an  
30 18 assessment. These times are not inclusive of equipment set up, pack up and scoring, which varies  
31 19 depending on the amount of equipment and complexity of the scoring process. All assessments  
32 20 require the user to be familiar with the test before administration and to possess a high level of  
33 21 understanding of child movement and development. The MABC-2 and PDMS-2 are the only  
34 22 assessments that come with supporting material to guide intervention post assessment (when the  
35 23 complete kit is purchased).  
36 24  
37 25  
38 26  
39 27  
40 28  
41 29  
42 30  
43 31  
44 32  
45 33  
46 34  
47 35  
48 36  
49 37  
50 38  
51 39  
52 40  
53 41  
54 42  
55 43  
56 44  
57 45  
58 46  
59 47  
60 48

#### 54 24 Methodological quality

55 25 All articles were assessed using the COSMIN checklist to determine methodological quality. Several  
56 26 studies were marked down for failing to report missing data, small sample sizes and for using  
57 27 inappropriate statistical methods. A summary of the articles and corresponding COSMIN  
58 28 methodology rating is provided in Table 3.  
59 29  
60 30

## Validity

The content and construct validity of the included assessment tools are summarised in Table 4.

Most assessments were developed by or with input from experts in the field, with most also performing literature reviews. Bruininks and Bruininks<sup>13</sup> performed comprehensive surveys, pilot, tryout and standardisation studies before finalising the BOT-2, providing the most comprehensively reported content validity.

Construct validity was confirmed with factor analysis (either exploratory or confirmatory) in most assessment tools. The TGMD-2 has the most evidence for construct validity with several papers performing confirmatory and exploratory factor analysis<sup>19 20 18 21 22 23</sup>. The MABC-2, BOT-2, Bayley-III, MAND and PDMS-2 had factor analysis performed only in one paper. The MABC-2 was shown to require changes to remain valid in the Chinese and Dutch speaking populations<sup>24 25</sup>. The BOT-2, MABC-2 and TGMD-2 all provide evidence of the ability to discriminate between particular age or diagnosis groups, which can be considered to support their content validity. The NSMDA has minimal assessment of construct validity in children over 2 years. The Bayley-III, NSMDA and MABC-2 are the only assessments that provide evidence of predictive validity (Table 5). Concurrent validity between the MABC-2, PDMS-2 and BOT-2 is moderate to high, whilst the TGMD-2 is only weakly correlated with the MABC-2<sup>5</sup> (Table 5). The PDMS-2, TMGD-2 and NSMDA report correlations with other criteria such as paediatrician diagnosis, physical fitness or psychomotor/intelligence tests.

Table 2. Clinical Utility of Gross Motor Assessment Tools

| Assessment Tool                 | Time to administer (min)  | Test Procedure                                                               | Target Examiner population                                                   | Training                                                            | Equipment/Manual                                                               |
|---------------------------------|---------------------------|------------------------------------------------------------------------------|------------------------------------------------------------------------------|---------------------------------------------------------------------|--------------------------------------------------------------------------------|
| <b>Bayley-III</b> <sup>12</sup> | 30-90                     | Therapist administers in standardised order                                  | Paediatric health professionals<br>early childhood specialists               | Formal training not required. DVD, webinars and workshops available | Comprehensive manual/kit: £1089<br>Test kit provides most equipment            |
| <b>BOT-2</b> <sup>13</sup>      | 40-60                     | Therapist administered in standardised order                                 | Paediatric health professionals<br>early childhood specialists               | Formal training not required                                        | Comprehensive manual/kit: £961<br>Test kit provides most equipment             |
| <b>MABC-2</b> <sup>14</sup>     | 20-40                     | Therapist administers items in standardised order. Some flexibility allowed. | Research psychologists, OT, PT,<br>Paediatricians                            | Formal training not required.                                       | Comprehensive manual/ kit: £1191<br>Test kit provides most equipment           |
| <b>MAND</b> <sup>15</sup>       | 15-20                     | Therapist administers items in standardised order.                           | Professionals e.g. education,<br>neurology, OT, PT, psychology etc.          | Formal training not required.                                       | Manual and test kit: £1366 includes equipment                                  |
| <b>NSMDA</b> <sup>16</sup>      | 20-45                     | Observation followed by therapist administration of test items.              | PT, OT                                                                       | Formal training not required (but is available)                     | Comprehensive manual: £35.<br>Equipment not included                           |
| <b>PDMS-2</b> <sup>17</sup>     | 45-60 (20-30 for GM only) | Standardised procedure.                                                      | Paediatric health professionals, PE teachers, early intervention specialists | Formal training not required                                        | Comprehensive manual/kit: £553<br>Includes some but not all equipment required |
| <b>TGMD-2</b> <sup>18</sup>     | 15-20                     | Standardised procedure.                                                      | Teachers, health professionals (OT, PT, doctors)                             | Formal training not required                                        | Kit includes manual and record form: £128.<br>Equipment not included           |

Bayley-III, Bayley Scale of Infant and Toddler Development 3<sup>rd</sup> edition<sup>12</sup>; BOT-2, Bruininks-Oseretsky Test of Motor Proficiency 2<sup>nd</sup> edition<sup>13</sup>; MABC-2, Movement Assessment Battery for Children 2<sup>nd</sup> edition<sup>14</sup>; MAND, McCarron Assessment of Neuromuscular Development<sup>15</sup>; NSMDA, Neurological Sensory Motor Developmental Assessment<sup>16</sup>; PDMS-2, Peabody Developmental Motor Scales 2<sup>nd</sup> edition<sup>17</sup>; TGMD-II, Test of Gross Motor Development 2<sup>nd</sup> edition<sup>18</sup>; GM, Gross motor; OT, Occupational Therapy; PT, Physiotherapy; PE, Physical Education

Table 3. Methodological quality of included articles

| Test                     | First author, Year                       | Country                  | Population<br>(Age,<br>Diagnosis) | Internal<br>consistency | Reliability                             | Measurement<br>error | Content<br>validity | Structural<br>validity | Hypothesis<br>testing | Cross-<br>cultural<br>validity | Criterion<br>validity | Responsive -<br>ness |
|--------------------------|------------------------------------------|--------------------------|-----------------------------------|-------------------------|-----------------------------------------|----------------------|---------------------|------------------------|-----------------------|--------------------------------|-----------------------|----------------------|
| <b>BAYLEY III</b>        | Bayley <sup>12</sup>                     | USA                      | 1-42 mths                         | Fair                    | Fair                                    | Good                 | Excellent           | Good                   | Good                  | -                              | Good                  | -                    |
|                          | Spittle, et al. <sup>4</sup>             | Australia                | 2,4 yrs, Ex<br>prem               | -                       | -                                       | -                    | -                   | -                      | -                     | -                              | Good                  | -                    |
|                          | Visser, et al. <sup>26</sup>             | Netherlands              | 2.2-10.8 yrs,<br>GDD, L.I.        | -                       | -                                       | -                    | Excellent           | Poor                   | -                     | -                              | -                     | -                    |
| <b>BOT-2</b>             | Wuang and Su <sup>27</sup>               | Taiwan                   | 4-12 yrs ID                       | Excellent               | Excellent                               | Excellent            | -                   | -                      | -                     | -                              | -                     | Fair                 |
|                          | Wuang, et al. <sup>28</sup>              | Taiwan                   | 3-6 yrs ID                        | Fair                    | Good                                    | Good                 | -                   | -                      | -                     | -                              | Good                  | Fair                 |
|                          | Bruininks and<br>Bruininks <sup>13</sup> | USA                      | 4-21 yrs                          | Good                    | Fair (interrater)<br>Fair (test-retest) | Good                 | Excellent           | Good                   | -                     | -                              | Good                  | -                    |
| <b>MABC-2<br/>(AB 1)</b> | Ellinoudis, et al. <sup>29</sup>         | Greece                   | 3-5.5 yrs                         | Excellent               | Good                                    | -                    | -                   | -                      | -                     | -                              | -                     | -                    |
|                          | Hua, et al. <sup>24</sup>                | China                    | 3-6 yrs                           | Excellent               | Good                                    | -                    | Excellent           | Excellent              | -                     | Poor                           | Excellent             | -                    |
|                          | Logan, et al. <sup>5</sup>               | USA                      | 3-6 yrs                           | -                       | -                                       | -                    | -                   | -                      | Fair                  | -                              | Fair                  | -                    |
|                          | Smits-Engelsman, et<br>al. <sup>30</sup> | Belgium                  | 3-4 yrs                           | Poor                    | Poor                                    | Poor                 | -                   | -                      | -                     | -                              | -                     | -                    |
|                          | Holm, et al. <sup>31</sup>               | Norway                   | 7-9 yrs                           | -                       | Fair (interrater)<br>Poor (intrarater)  | Poor                 | -                   | -                      | -                     | -                              | -                     | -                    |
| <b>MABC-2<br/>(AB 2)</b> | Kita, et al. <sup>32</sup>               | Japan                    | 7-10 yrs                          | Excellent               | -                                       | -                    | -                   | -                      | -                     | Poor                           | -                     | -                    |
|                          | Griffiths, et al. <sup>33</sup>          | Australia                | 4-8 yrs                           | -                       | -                                       | -                    | -                   | -                      | -                     | -                              | Good                  | -                    |
| <b>MABC-2</b>            | Henderson, et al. <sup>14</sup>          | UK                       | 3-16 yrs                          | -                       | Fair                                    | Good                 | Excellent           | -                      | -                     | -                              | -                     | -                    |
|                          | Niemeijer, et al. <sup>25</sup>          | Netherlands<br>+ Belgium | -                                 | -                       | -                                       | -                    | -                   | -                      | -                     | Poor                           | -                     | -                    |
|                          | Schulz, et al. <sup>34</sup>             | U.K                      | 3-16 yrs                          | -                       | -                                       | -                    | Excellent           | Good                   | -                     | -                              | -                     | -                    |
|                          | Valentini, et al. <sup>35</sup>          | Brazil                   | 3-13 yrs                          | Fair                    | Fair                                    | -                    | Fair                | Poor                   | -                     | Poor                           | Poor                  | -                    |

1  
2  
3  
4  
5  
6  
7  
8  
9  
10  
11  
12  
13  
14  
15  
16  
17  
18  
19  
20  
21  
22  
23  
24  
25  
26  
27  
28  
29  
30  
31  
32  
33  
34  
35  
36  
37  
38  
39  
40  
41  
42  
43  
44  
45  
46  
47

|               |                                   |             |                   |           |                                         |      |           |           |      |      |           |      |
|---------------|-----------------------------------|-------------|-------------------|-----------|-----------------------------------------|------|-----------|-----------|------|------|-----------|------|
|               | Wuang, et al. <sup>28</sup>       | Taiwan      | 3-6 yrs, ID       | Fair      | Good                                    | Good | -         | -         | -    | -    | Good      | Fair |
|               | Wuang, et al. <sup>36</sup>       | Taiwan      | 6-12 yrs DCD      | Poor      | Fair                                    | Good | -         | -         | -    | -    | -         | Fair |
| <b>MAND</b>   | Hands, et al. <sup>37</sup>       | Australia   | 10-17 yrs         | -         | -                                       | -    | -         | Excellent | -    | -    | -         | -    |
|               | McCarron <sup>15</sup>            | USA         | 7yrs              | -         | -                                       | -    | Fair      | Poor      | -    | -    | Poor      | -    |
| <b>NSMDA</b>  | Danks, et al. <sup>38</sup>       | Australia   | 2 + 4 yrs<br>ELBW | -         | -                                       | -    | -         | -         | -    | -    | Fair      | -    |
|               | MacDonald and Burns <sup>39</sup> | Australia   | 2 + 4 yrs CP      | -         | -                                       | -    | -         | Fair      | -    | -    | Poor      | -    |
|               | Burns, et al. <sup>40</sup>       | Australia   | 1-24 mths<br>VLBW | Poor      | -                                       | -    | Poor      | -         | -    | -    | -         | -    |
|               | Burns, et al. <sup>41</sup>       | Australia   | 1-mnths<br>VLBW   | -         | -                                       | -    | -         | Poor      | -    | -    | Fair      | -    |
| <b>PDMS-2</b> | Hua, et al. <sup>24</sup>         | China       | 3-6 yrs.          | Excellent | Good                                    | -    | Excellent | Excellent | -    | Poor | Excellent | -    |
|               | Wuang, et al. <sup>28</sup>       | Taiwan      | 3-6 yrs ID        | Fair      | Good                                    | Good | -         | -         | -    | -    | Good      | Fair |
|               | Folio and Fewell <sup>17</sup>    | USA         | 0-71 mths         | Good      | -                                       | Poor | Excellent | Good      | Good | -    | Poor      | -    |
| <b>TGMD-2</b> | Barnett, et al. <sup>42</sup>     | Australia   | 4-8 yrs           | -         | Fair                                    | -    | -         | -         | -    | -    | -         | -    |
|               | Farrokhi, et al. <sup>43</sup>    | Iran        | 3-11 yrs          | Fair      | Fair                                    | -    | Fair      | Fair      | -    | -    | -         | -    |
|               | Houwen, et al. <sup>21</sup>      | Netherlands | 6-12 yrs VI       | Fair      | Fair                                    | -    | -         | Fair      | -    | -    | -         | -    |
|               | Kim, et al. <sup>44</sup>         | Korea       | 8-12 yrs ID       | -         | Poor                                    | -    | -         | -         | -    | -    | -         | -    |
|               | Kim, et al. <sup>45</sup>         | Korea       | 5-6 yrs           | Poor      | Fair                                    | -    | -         | Poor      | -    | -    | Poor      | -    |
|               | Logan, et al. <sup>5</sup>        | USA         | 3-6 yrs           | -         | -                                       | -    | -         | -         | Fair | -    | Fair      | -    |
|               | Rudd, et al. <sup>19</sup>        | Australia   | 6-12 yrs          | -         | -                                       | -    | -         | Good      | -    | -    | -         | -    |
|               | Simons, et al. <sup>23</sup>      | Belgium     | 7-10 yrs ID       | Good      | Good (interrater)<br>Poor (test-retest) | -    | Excellent | Good      | Good | -    | -         | -    |
|               | Valentini <sup>20</sup>           | Brazil      | 3-10 yrs          | Poor      | Fair (test-retest)<br>Good (intra,      | -    | Excellent | Good      | -    | Fair | Good      | -    |



1  
2  
3  
4  
5  
6  
7  
8  
9  
10  
11  
12  
13  
14  
15  
16  
17  
18  
19  
20  
21  
22  
23  
24  
25  
26  
27  
28  
29  
30  
31  
32  
33  
34  
35  
36  
37  
38  
39  
40  
41  
42  
43  
44  
45  
46  
47

| interrater)                       |       |          |      |                    |      |      |      |   |   |      |   |
|-----------------------------------|-------|----------|------|--------------------|------|------|------|---|---|------|---|
| Wong and Yin Cheung <sup>22</sup> | China | 3-10 yrs | -    | -                  | -    | -    | Fair | - | - | -    | - |
| Ulrich <sup>18</sup>              | USA   | 3-10 yrs | Good | Fair (test-retest) | Fair | Poor | Good | - | - | Fair | - |
| Poor (interrater)                 |       |          |      |                    |      |      |      |   |   |      |   |

Bayley-III, Bayley Scale of Infant and Toddler Development 3<sup>rd</sup> edition;<sup>12</sup> BOT-2, Bruininks-Oseretsky Test of Motor Proficiency 2<sup>nd</sup> edition;<sup>13</sup> MABC-2, Movement Assessment Battery for Children 2<sup>nd</sup> edition;<sup>14</sup> MAND, McCarron Assessment of Neuromuscular Development;<sup>15</sup> NSMDA, Neurological Sensory Motor Developmental Assessment;<sup>16</sup> PDMS-2, Peabody Developmental Motor Scales 2<sup>nd</sup> edition;<sup>17</sup> TGMD-II, Test of Gross Motor Development 2<sup>nd</sup> edition;<sup>18</sup> Mths, Months; yrs, years; DCD, Developmental Coordination Disorder; VI, Vision Impairment; ID, Intellectual Disability; GDD, global developmental delay; L.I, Language Impairment; ELBW, Extremely Low Birth Weight; VLBW, Very Low Birth Weight; CP, Cerebral Palsy; prem, premature; USA, United States of America

For peer review only

## 1 Reliability

2 Internal consistency of assessments are summarised in Table 6. The BOT-2's high internal  
3 consistency is well supported, including for children with an intellectual disability<sup>28 46</sup>. The MABC-2  
4 appears to have lower internal consistency than the BOT-2, which may relate to the limited number  
5 of test items (eight) on the MABC-2. The highest values for internal consistency for the MABC-2  
6 were obtained in specific populations (intellectual disability and developmental coordination  
7 disorder) with poor to fair methodology only. Conversely the highest quality articles reported the  
8 lowest values, although it should be noted that these assessed age band 1 (3-6 years) only. Internal  
9 consistency is reported to be high for the PDMS-2, while the Bayley-III is shown to have excellent  
10 internal consistency in children aged 24-42 months.. The TGMD-2 is reported by two good quality  
11 (and four poor to fair quality) articles to have excellent internal consistency, including for children  
12 with vision impairment and intellectual disability. The MAND is the only assessment tool included in  
13 this review without published data of internal consistency or reliability in this age group.

14 The reliability findings are summarised in Table 6 and in Figures 2 and 3. Test-retest reliability was  
15 excellent in the Bayley-III (Table 6), BOT-2 and PDMS-2; and was good to excellent in the MABC-2  
16 and TGMD-2 (Figure 2). Intra-rater reliability was rarely investigated or reported for most tools, with  
17 the TGMD-2 demonstrating better results than the MABC-2 (Figure 3). Only the TGMD-2 and  
18 MABC-2 report inter-rater reliability values using an ICC (Figure 3)<sup>31 42</sup>. Inter-rater reliability is also  
19 supported in the BOT-2 with Pearson Correlation Coefficient and Kappa respectively. The studies  
20 referred to in the test manuals for the TGMD-2, Bayley-III, BOT-2 and MABC-2 all report reliability  
21 findings using Pearson's correlation, which is less ideal than an ICC or weighted kappa for statistical  
22 analysis<sup>47 48</sup>. Only studies reporting ICC's are visually represented in Figures 2 (test-retest) and 3  
23 (inter and intra-rater). The TGMD-2 test-retest reliability results from Houwen, et al.<sup>21</sup> were  
24 believed to contain an error as the reported ICC was outside of the reported confidence intervals  
25 (ICC 0.92, 0.82-0.91). This data set was therefore excluded from Figure 2.

26 Responsiveness was reported for the Bayley-III, BOT-2, MABC-2 and PDMS-2 with minimal  
27 detectable change (MDC) or a standard error of measurement (SEM)<sup>28</sup>. Sensitivity and specificity  
28 for detecting change was shown to be satisfactory in the MABC-2, PDMS-2 and MABC-2<sup>28</sup> (Table 6).  
29 There have been no studies to date on the responsiveness of the TGMD-2, NSMDA or MAND.

Table 4: Content and construct validity of assessment tools

| Test              | Content                                                                                                                                                                                                                                                                                        | Construct                                                                                                                                                                                                                                                                                                                                                                                                                                                                                                                                                                                                                                                                                                           |
|-------------------|------------------------------------------------------------------------------------------------------------------------------------------------------------------------------------------------------------------------------------------------------------------------------------------------|---------------------------------------------------------------------------------------------------------------------------------------------------------------------------------------------------------------------------------------------------------------------------------------------------------------------------------------------------------------------------------------------------------------------------------------------------------------------------------------------------------------------------------------------------------------------------------------------------------------------------------------------------------------------------------------------------------------------|
| <b>BAYLEY III</b> | Expert opinion for standard and low verbal version <sup>12 26</sup> . Literature reviews. Gross motor score correlated with Motor component 0.70 <sup>12</sup>                                                                                                                                 | Factor analysis. Difference in mean scores with pervasive developmental disorder, and specific language impairment <sup>12</sup> . $H_i$ (gross motor subset) = 0.52-0.97 for children with language impairment and 0.82-0.99 in control group <sup>26</sup>                                                                                                                                                                                                                                                                                                                                                                                                                                                        |
| <b>BOT-2</b>      | Focus groups, product survey, pilot, national tryout and standardisation studies, professional reviews <sup>13</sup>                                                                                                                                                                           | Factor analysis, scores increase with age, discriminates between normal and children with DCD ( $N=50$ ), high-functioning ASD ( $N=45$ ) and mild-moderate ID ( $N=66$ ) <sup>13</sup>                                                                                                                                                                                                                                                                                                                                                                                                                                                                                                                             |
| <b>MABC-2</b>     | Expert Panel, Stakeholder feedback, Literature review <sup>31</sup><br><br>Expert panel - clarity (validity content index 71.8-93.9, Kappa 0.76-0.88) and pertinence (98.5-99.3 and kappa 0.83-0.92) $p<0.001$ <sup>35</sup>                                                                   | Factor analysis, correlation coefficients <sup>29</sup> Subtest correlations 0.65-0.76 $p<0.001$ . Discriminates between ASD and control group <sup>31</sup> . Structural equation modelling (for each age group) <sup>34</sup> . Expert panel - adequate face validity <sup>35</sup> . Significant difference between TD, DCD and at risk DCD scores ( $\eta^2 = 0.63$ ) $p<0.0001$ <sup>35</sup> . UK norms not appropriate to use with Dutch/Flemish children as under/over-estimate risk of motor impairment <sup>25</sup> . In Chinese population: CFA initially rejected. Acceptable fit achieved after 2 items removed <sup>24</sup> . Age band 2 shows good validity in Japanese population <sup>32</sup> . |
| <b>MAND</b>       | Based on neuropsychological theory. Several rounds of revision/trials of tasks during development <sup>15</sup>                                                                                                                                                                                | Factor analysis <sup>15 37</sup> . Scores increase with age, and discriminate between typically developing children and those with head trauma or neurological dysfunction as well as gender <sup>15 37</sup>                                                                                                                                                                                                                                                                                                                                                                                                                                                                                                       |
| <b>NSMDA</b>      | Literature review. Developed by an experienced paediatric physiotherapist <sup>40</sup>                                                                                                                                                                                                        | Factor analysis (up to 2 years of age) <sup>40 41</sup> . Stability of test results over time (up to 2 years) <sup>40 41</sup> .                                                                                                                                                                                                                                                                                                                                                                                                                                                                                                                                                                                    |
| <b>PDMS-2</b>     | Literature review. Created by experts in the field. Revised with feedback from therapists guided revision. Hierarchical sequence of items <sup>17</sup>                                                                                                                                        | Item response modelling. Factor analysis. Differential item functioning analysis. Scores correlated with age ( $r=0.80-0.93$ ) <sup>17</sup>                                                                                                                                                                                                                                                                                                                                                                                                                                                                                                                                                                        |
| <b>TGMD-2</b>     | Expert Panel (3 PE teachers with post-grad qualifications) <sup>18</sup> . Translated version (Brazilian Portuguese) language clarity 0.96, pertinence $>0.89$ . Experts CVI for clarity and pertinence were also strong- $\alpha = 0.93$ clarity and $\alpha = 0.91$ pertinence <sup>20</sup> | Exploratory and confirmatory factor analysis <sup>19 20 18 21 22 23</sup> High and significant correlation of increasing age and increasing scores <sup>43</sup> . Age and disability differentiation <sup>18 23</sup> Subtest correlation 0.41 <sup>18</sup><br><br>Gallop, running and leaping not well correlated with locomotion subscale. Object control significant & highly correlated <sup>45</sup> . ANOVA - significant age effect for object control <sup>23</sup><br><br>Moderate correlation between items and subset scores, and between subset scores and total score <sup>23</sup>                                                                                                                  |

Bayley-III, Bayley Scale of Infant and Toddler Development 3<sup>rd</sup> edition;<sup>12</sup> BOT-2, Bruininks-Oseretsky Test of Motor Proficiency 2<sup>nd</sup> edition;<sup>13</sup> MABC-2, Movement Assessment Battery for Children 2<sup>nd</sup> edition;<sup>14</sup> MAND, McCarron Assessment of Neuromuscular Development;<sup>15</sup> NSMDA, Neurological Sensory Motor Developmental Assessment;<sup>16</sup> PDMS-2, Peabody Developmental Motor Scales 2<sup>nd</sup> edition;<sup>17</sup> TGMD-II, Test of Gross Motor Development 2<sup>nd</sup> edition;<sup>18</sup>;  $H_i$ , scalability coefficient; CFA, Confirmatory Factor Analysis; TD, Typically Developing; ASD, Autism Spectrum Disorder, ID, Intellectual Disability; WPPSI, *Wechsler Preschool and Primary Scale of Intelligence*; WISC-R, Wechsler Preschool and Primary Scale of Intelligence-R; NDI, Neurodevelopmental Index; ANOVA, Analysis of Variance

Table 5: Criterion and predictive validity of assessment tools

| Test              | Criterion                                                                                                                                                                                                                                                        | Predictive                                                                                                                                                                                                                                                                                                                                                                        |
|-------------------|------------------------------------------------------------------------------------------------------------------------------------------------------------------------------------------------------------------------------------------------------------------|-----------------------------------------------------------------------------------------------------------------------------------------------------------------------------------------------------------------------------------------------------------------------------------------------------------------------------------------------------------------------------------|
| <b>BAYLEY III</b> | Given but mean age <22 months. Not relevant to study population. <sup>12</sup>                                                                                                                                                                                   | Motor impairment at 4 years: Bayley III at 2 years <1SD = sensitivity 0.32-0.037 specificity 0.97 <2SD sensitivity 0.18-0.21 specificity 1.00.<br>CP at 4 years: Bayley III at 2 years <1SD sensitivity 0.83 specificity 0.94. <2SD sensitivity 0.67 specificity 1.0 <sup>4</sup>                                                                                                 |
| <b>BOT-2</b>      | MABC-2 $\rho = 0.92$ PDMS-2 $\rho = 0.88$ ( $N = 38$ ) <sup>28</sup> . PDMS-2 Total motor composite $r = 0.77$ <sup>13</sup> .                                                                                                                                   | -                                                                                                                                                                                                                                                                                                                                                                                 |
| <b>MABC-2</b>     | PDMS-2 $\rho = 0.631 - 0.84$ <sup>28,24</sup> . TGMD-2 $\rho = 0.45$ <sup>5</sup> . TGMD-2 standard scores ( $r = 0.3, p < 0.02$ ) <sup>35</sup> . BOT-2 $\rho = 0.90 - 0.92$ <sup>28</sup> .                                                                    | Classification groups (DCD, at risk and TD) remained same over time (6 months) $\chi^2 = 0.67 p = 0.72$ <sup>35</sup> . Predictive of motor impairment over 6-12 months ( $N=41$ ) ICC 0.88 $p < 0.007$ <sup>35</sup> . Scores at 4 years predictive of motor impairment at 8 years in children born <30 weeks gestation (PPV 79, sensitivity 79%, specificity 93%) <sup>33</sup> |
| <b>MAND</b>       | Gross motor subscore: Low-moderate correlation with manual dexterity (-0.46 to 0.35), reaction time (-0.31 to -0.58), intelligence measures (WISC-R, Metropolitan Achievement Test) (0.30-0.39) and visual motor test (-0.33 to 0.39) <sup>15</sup>              | -                                                                                                                                                                                                                                                                                                                                                                                 |
| <b>NSMDA</b>      | NSMDA at 2 years ( $N = 148$ ) predictive of medical diagnosis $\chi^2 = 0.08 p = NS$ <sup>41</sup>                                                                                                                                                              | Motor outcome at 11-13 yrs. NSMDA at 2years - sensitivity 48.8%, specificity 82.4%, NSMDA at 4 years sensitivity 64.5%, and specificity 80%. PPV at 2 years 83% at 4 years 87% <sup>38</sup> . If classified 'severe' at 24 months - approximately 50% chance walking at 4 years (moderate = 80%, mild = 93% minimal = 100%) <sup>39</sup>                                        |
| <b>PDMS-2</b>     | MABC-2 $\rho = 0.63 - 0.84$ , <sup>24,28</sup> MABC-2 gross motor composite $\rho = 0.743$ <sup>24</sup><br>BOT-2 $\rho = 0.88$ <sup>28</sup> . Mullen Scales of Early Learning GMQ = 0.86 FMQ = 0.80 <sup>17</sup>                                              | -                                                                                                                                                                                                                                                                                                                                                                                 |
| <b>TGMD-2</b>     | MABC-2 total $r = 0.49 p < 0.01$ <sup>5</sup> . 'Teacher report' $r = 0.34-0.45$ . physical fitness $r = -0.47 - 0.55$ <sup>45</sup><br>( $N=41$ ) Basic Motor Generalizations subtest of the CSSA $r = 0.63$ . Locomotor 0.63 object control 0.41 <sup>18</sup> | -                                                                                                                                                                                                                                                                                                                                                                                 |

Bayley-III, Bayley Scale of Infant and Toddler Development 3<sup>rd</sup> edition;<sup>12</sup> BOT-2, Bruininks-Oseretsky Test of Motor Proficiency 2<sup>nd</sup> edition;<sup>13</sup> MABC-2, Movement Assessment Battery for Children 2<sup>nd</sup> edition;<sup>14</sup> MAND, McCarron Assessment of Neuromuscular Development;<sup>15</sup> NSMDA, Neurological Sensory Motor Developmental Assessment;<sup>16</sup> PDMS-2, Peabody Developmental Motor Scales 2<sup>nd</sup> edition;<sup>17</sup> TGMD-II, Test of Gross Motor Development 2<sup>nd</sup> edition;<sup>18</sup> NS, Not Specified; SD, Standard Deviation; CP, Cerebral Palsy; TD, Typically Developing; ICC, Intraclass Correlation Coefficient;  $\chi^2$ , Chi Squared; NDI, Neurodevelopmental Index; CSSA, Comprehensive Scales of Student Abilities

Table 6: Reliability of assessment tools

| Test                 | Internal Consistency                                                                                                                                                           | Test-Retest                                                                                                                                                                                 | Intra-rater                                 | Inter-rater                                                                     | Minimal detectable change                                                                                                | Minimal clinical important difference                                                                                 |
|----------------------|--------------------------------------------------------------------------------------------------------------------------------------------------------------------------------|---------------------------------------------------------------------------------------------------------------------------------------------------------------------------------------------|---------------------------------------------|---------------------------------------------------------------------------------|--------------------------------------------------------------------------------------------------------------------------|-----------------------------------------------------------------------------------------------------------------------|
| <b>BAYLEY III</b>    | GM $\alpha = 0.87$ - $0.93$ MC: $\alpha 0.90$ - $0.96$ (24-42 months) <sup>12</sup>                                                                                            | Gross Motor subtest (N=47) $r=0.79$<br>Motor component $r=0.80$ <sup>12</sup>                                                                                                               | -                                           | -                                                                               | SEM Gross motor subtest 0.85-1.08. of Motor component = 3.00-4.74 (24-42 months) <sup>12</sup>                           | -                                                                                                                     |
| <b>BOT-2</b>         | (N = 100) $\alpha = 0.92$ <sup>27</sup><br>(N = 141) $\alpha = 0.86$ <sup>28</sup><br>4-7 yrs (N= 620) $\alpha = 0.95$ 8-11 yrs (N= 450) $\alpha = 0.95$ <sup>13</sup>         | (N = 100) ICC = 0.99 <sup>27</sup> (N = 141) ICC = 0.97 <sup>28</sup> 4-7 yrs (N = 43) $r = 0.81$ (8-12 yrs (N= 44) $r = 0.80$ <sup>13</sup>                                                | -                                           | Total motor composite 4-21 yrs (N = 47) $r = 0.98$ <sup>13</sup>                | 4.18 (sensitivity 55.10% specificity 72.55%) <sup>27</sup> 7.43 (sensitivity 42.49% specificity 65.72%) <sup>28</sup>    | 6.53 (sensitivity 48.98% specificity 76.47%) <sup>27</sup> 6.55 (sensitivity 49.99% specificity 58.78%) <sup>28</sup> |
| <b>MABC-2 (AB 1)</b> | (N = 60) M.D $\alpha = 0.51$ , A&C $\alpha = 0.70$ , Bal $\alpha = 0.66$ <sup>29</sup> (N = 1823) $\alpha = 0.502$ <sup>24</sup> (N=50) $\alpha = 0.81$ - $0.87$ <sup>30</sup> | (N=60) ICC = 0.85 <sup>29</sup> Item ICC's 0.830-0.985 <sup>24</sup> ICC test-retest = 0.83 <sup>30</sup> Inter-rater test-retest ICC = 0.79 <sup>30</sup>                                  | (N=28) $\kappa = 0.71$ <sup>30</sup>        | Item ICC's range 0.892-0.998 <sup>24</sup> (N=22) $\kappa = 0.60$ <sup>30</sup> | (N=28) Intrarater MDC = 3.43 (N=22) Inter-tester MDC = 3.81 <sup>30</sup>                                                | -                                                                                                                     |
| <b>MABC-2 (AB 2)</b> | Translated version (Japanese) (N=132) $\alpha = 0.602$ <sup>32</sup>                                                                                                           | -                                                                                                                                                                                           | ICC = 0.64 <sup>31</sup>                    | ICC 0.63 <sup>31</sup>                                                          | Intra-rater SDC TTS: +/- 11.7 TSS +/- 3.3. Inter-rater SDC TTS +/-16.0 TSS +/- 3.8 <sup>31</sup>                         | -                                                                                                                     |
| <b>MABC-2</b>        | Subscales $\alpha = 0.78$ (M.D = 0.77, BS = 0.52, Bal = 0.77) <sup>35</sup> $\alpha = 0.88$ <sup>36</sup> (N = 141) $\alpha = 0.88$ <sup>28</sup>                              | N=60 (all 3 age bands) $r=0.80$ <sup>14</sup> $r=0.74$ $p<0.0001$ (standard score).<br>ICC standard score = 0.85 <sup>35</sup><br>ICC 0.96 <sup>36</sup><br>N = 141 ICC =0.96 <sup>28</sup> | ICC 0.88 <sup>35</sup>                      | ICC 0.96-0.99 <sup>35</sup>                                                     | SEM 1.34 (95%CI) = 3 <sup>14</sup> 1.83 (95%CI) <sup>36</sup> 1.83 (sensitivity 69.69% specificity 52.10%) <sup>28</sup> | 1.39 (sensitivity 72.47% specificity 46.18%) <sup>28 36</sup>                                                         |
| <b>MAND</b>          | -                                                                                                                                                                              | -                                                                                                                                                                                           | -                                           | -                                                                               | -                                                                                                                        | -                                                                                                                     |
| <b>NSMDA</b>         | Cross correlation matrix Item scoring (12+24months) 0.73 $p<0.001$ , Functional grade (12+24months) 0.87 $p<0.001$ <sup>40</sup>                                               | -                                                                                                                                                                                           | -                                           | -                                                                               | -                                                                                                                        | -                                                                                                                     |
| <b>PDMS-2</b>        | (N=141) $\alpha=0.89$ <sup>28</sup> 24-35m $\alpha=0.97$ , 36-47m $\alpha=0.95$ , 48-59m $\alpha=0.97$ , 60-71m $\alpha=$                                                      | N=141 ICC= 0.97 <sup>28</sup>                                                                                                                                                               | unable to extract data for $\geq 24$ months | unable to extract data for $\geq 24$ months <sup>17</sup>                       | 7.76 (sensitivity 60.65% specificity 74.13%) <sup>28</sup> SEM 24-                                                       | 8.39 (sensitivity 61.65% specificity 71.34%) <sup>28</sup>                                                            |

1  
2  
3  
4  
5  
6  
7  
8  
9  
10  
11  
12  
13  
14  
15  
16  
17  
18  
19  
20  
21  
22  
23  
24  
25  
26  
27  
28  
29  
30  
31  
32  
33  
34  
35  
36  
37  
38  
39  
40  
41  
42  
43  
44  
45  
46  
47

|               | 0.98. For subgroups† $\alpha=0.99$ <sup>17</sup>                                                                                                                                                                                                                                                                                                          |                                                                                                                                                                                                                                                                                                                               | <sup>17</sup>                                                                                                                  | 59 months = 3, 60-71m = 2 <sup>17</sup>                                                                                                                                                   |
|---------------|-----------------------------------------------------------------------------------------------------------------------------------------------------------------------------------------------------------------------------------------------------------------------------------------------------------------------------------------------------------|-------------------------------------------------------------------------------------------------------------------------------------------------------------------------------------------------------------------------------------------------------------------------------------------------------------------------------|--------------------------------------------------------------------------------------------------------------------------------|-------------------------------------------------------------------------------------------------------------------------------------------------------------------------------------------|
| <b>TGMD-2</b> | ( $N=1438$ ) $\alpha=0.80$ <sup>43</sup> $N=75$ Locomotor subset $\alpha=0.71$ object control $\alpha=0.72$ <sup>21</sup> $N=120$ $\alpha = 0.72$ <sup>45</sup> $N=99$ $\alpha = 0.90$ <sup>23</sup> $N = 1208$ Cronbach's $\alpha = 0.91$ (gross motor quotient). Locomotor 0.85 and object control 0.88. Note SEM GMQ = 4-5 SEM subsets=1 <sup>18</sup> | $N=63$ ICC=0.81 95% CI <sup>43</sup> $N=23$ ICC=0.92 total 95% CI <sup>21</sup> $N=99$ $r=0.98$ <sup>23</sup> Locomotor test $r = 0.90$ $p < 0.0001$ object control test $r = 0.91$ $p < 0.001$ <sup>20</sup> $N = 75$ $r=0.96$ overall (3-5 yrs $r = 0.91$ ), 6-8 years $r = 0.95$ ), (9-10 years $r = 0.94$ ) <sup>18</sup> | $N=32$ ICC=0.97 95% CI <sup>43</sup> $N=25$ ICC=0.95 95% CI <sup>21</sup> ICC = 0.78 <sup>44</sup> ICC=0.92-0.99 <sup>20</sup> | Obj ICC=0.93 <sup>42</sup> ( $N=50$ ) ICC=0.89 <sup>21</sup> ICC=0.75 <sup>44</sup> $N=8$ $r= 1.00$ <sup>23</sup> L.S ICC=0.88 Obj ICC=0.89 <sup>20</sup> $N = 30$ $r=0.98$ <sup>18</sup> |

Bayley-III, Bayley Scale of Infant and Toddler Development 3<sup>rd</sup> edition;<sup>12</sup> BOT-2, Bruininks-Oseretsky Test of Motor Proficiency 2<sup>nd</sup> edition;<sup>13</sup> MABC-2, Movement Assessment Battery for Children 2<sup>nd</sup> edition;<sup>14</sup> MAND, McCarron Assessment of Neuromuscular Development;<sup>15</sup> NSMDA, Neurological Sensory Motor Developmental Assessment;<sup>16</sup> PDMS-2, Peabody Developmental Motor Scales 2<sup>nd</sup> edition;<sup>17</sup> TGMD-II, Test of Gross Motor Development 2<sup>nd</sup> edition;<sup>18</sup> GM, Gross Motor Subset; MC, Motor Component; K, Kappa Coefficient; M.D, Manual Dexterity; BS, Ball Skills; BAL, Balance; A&C, Aiming and catching; SDC, Smallest Detectable Change; TTS, Total Test Score; TSS, Total Standard Score; †, gender, ethnicity, speech/language or physical disorder; Obj, Object Control Subset; L.S, Locomotion Subset

## Discussion

This review identified seven gross motor assessment tools appropriate for use in clinical or research settings, each with their own strengths and limitations. Interestingly, only one of the seven assessments (TGMD-2) measured gross motor skills in isolation. This is likely a reflection on current practice to assess children's development as a whole, rather than assessing individual domains in isolation. A gross motor assessment embedded within a developmental assessment, such as that of the Bayley-III may be more appropriate than an isolated gross motor assessment for children where there is suspicion of multiple impairments.

A review by Slater, et al.<sup>8</sup> reported that the TGMD-2 and the MABC (first edition) were recommended for assessing gross motor skills in children with developmental coordination disorder, but found that the MABC needed further evidence of validity. Cools, et al.<sup>49</sup> also published a detailed review of the clinical utility of gross motor assessment tools for children, but did not address the validity, reliability or responsiveness to change of these measures. This review adds to the literature by including updated information on the psychometric properties of the measures and a thorough methodological assessment using the COSMIN checklist which allows the reader to interpret these results with confidence. We have identified ten additional publications to support the content, construct and criterion validity of the MABC-2 and have demonstrated an overall higher methodological quality of the papers assessing the MABC-2 when compared with the TGMD-2. Papers that received lower methodological scores on the COSMIN can be attributed to inadequate reporting statistical methods, small sample sizes and non-independent assessors. Further research in this area should consider addressing these limitations in their study design to reduce potential error and increase confidence when interpreting results.

Content validity has been established for five of the included assessment tools, however, further research into the content validity for the MAND and NSMDA is required. The NSMDA's ability to predict a diagnosis of CP and motor outcomes over time does support its content validity, however the methodology scored as poor to fair on the COSMIN and as such content validity cannot be fully established. The use of expert panels, focus groups and/or stakeholder feedback for the BOT-2, MABC-2, TGMD-2 and PDMS-2 demonstrate thorough consideration of the relevance and comprehensiveness of the each test's assessment items during development.

1 The TGMD-2 is the only assessment tool considered to have well established construct validity, with  
2 several papers reporting factor analysis. The NSMDA has undergone factor analysis for children up to, but  
3 not beyond two years of age and as such further research is needed to support its validity in older children.  
4 All other included assessment tools have undergone factor analysis assessment of their construct validity in  
5 one paper and are supported by the ability to discriminate between medical diagnosis or age, and as such  
6 are considered to have adequate construct validity. The criterion validity indicates that the TGMD-2 may  
7 be measuring a slightly different construct to the other assessment tools included in this study as it has  
8 poor agreement with the MABC-2, which in turn has good agreement with the PDMS-2 and the BOT-2.  
9 This difference may be related to the inclusion of the assessment of quality of movement in the TGMD-2,  
10 or the inclusion of balance and/or fine motor tasks on the other assessments. There is scope to investigate  
11 the criterion validity of the MAND and the gross motor subsections of the Bayley-III and the NSMDA with  
12 the other assessment tools in this study in the future.

13 The BOT-2 was the only assessment tool to have its reliability assessed with excellent methodology. In  
14 conjunction with its reported results it can be considered to have the strongest evidence for internal  
15 consistency and test-retest reliability out of the included assessment tools. The PDMS-2 and the MABC-2  
16 can be considered to have the next best established test-retest reliability with good methodological  
17 quality. The reported test-retest reliability values for the TGMD-2 are impacted by the poor to fair  
18 methodological quality, and further high quality research needs to be done to support its body of evidence.  
19 Test-rest, inter or intra-rater reliability has not been assessed in the MAND and NSMDA. In the clinical  
20 context gross motor assessments are often repeated over time or between therapists and as such these  
21 measures of reliability should be established. The Bayley-III would also benefit from further research into  
22 its reliability, with no published inter or intra-rater reliability measures, and with only one, fair quality  
23 report of good test-retest reliability.

24 As yet there is little evidence to support the use of these assessments as outcome measures. The inclusion  
25 in some of the articles of minimal detectable change (MDC) and minimal clinically important difference  
26 (MCID) is valuable for clinicians<sup>7</sup>. The difference between MDC and MCID is also of importance, as a change  
27 in score does not necessarily relate to a meaningful change for the child or their family. Only the Bayley,  
28 BOT-2, MABC-2 and PDMS-2 have a reported MCID with satisfactory sensitivity and specificity, however,  
29 due to the fair methodological quality used to obtain these values they cannot be utilised with a high level  
30 of confidence until further studies have been performed. The TGMD-2 was created in part to be used as an  
31 outcome measure, however there are no articles to date investigating its responsiveness to change<sup>18</sup>. It  
32 should also be noted that all of the included assessment tools measure impairment and activity limitations,  
33 but do not specifically address the other elements of the International Classification of Functioning,



1 Disability and Health (ICF) domains of participation, personal factors and environment <sup>2</sup>. Clinicians should  
2 utilise appropriate assessments or questionnaires to ensure that these domains of health are also  
3 addressed in line with World Health Organisation guidelines <sup>2</sup>.  
4

5  
6 4 When considering a test's reliability all three elements of test error should be taken into account – these  
7 can be described as time sampling (assessed with test-retest reliability), content sampling (assessed as  
8 internal consistency), and inter-scorer difference (or interrater reliability) <sup>18</sup>. This is one of the reasons that  
9 clinicians should consider repeating assessments and/or completing a second alternative assessment. All  
10 assessments should be interpreted in conjunction with clinical reasoning and observation. Included  
11 assessment tools are not intended to be diagnostic on their own; results need to be combined with other  
12 assessments and expert opinion to arrive at a clinical diagnosis.  
13  
14

15  
16 11 All of the included assessment tools were found to have merits and limitations in their clinical utility the  
17 body of evidence to support their use. Clinicians and researches should select their assessment tool with  
18 consideration of psychometric properties (inclusive of the methodological rigour behind them), clinical  
19 utility and for the population, situation and age group in question.  
20  
21

22  
23 15 A potential limitation of this study was that one author screened the titles and abstracts, which may have  
24 led to a sampling bias. Whilst care was taken to include all potentially relevant papers and assessment  
25 tools until the second round of assessment with two authors, the potential for exclusion of papers relevant  
26 to this review remains. The process of excluding both papers and assessment tools in this single step may  
27 also be seen as a limitation, as the total number of assessment tools (or different versions of tools) was not  
28 reported. This process does, however comply with the COSMIN and PRISMA guidelines. A second  
29 limitation was the restriction of included papers and manuals to those published in English. Unfortunately  
30 this resulted in the exclusion of three assessment tools that have been reported as commonly used in  
31 Europe: The Motoriktest für Vier- bis Sechsjährige Kinder (MOT 4-6), the Körperkoordinationstest für Kinder  
32 (KTK) and the Maastrichtse Motoriek Test (MMT)<sup>49</sup>. The authors also note the third edition of the TGMD is  
33 soon to be published and will need to be subjected to a similar level of assessment of psychometric  
34 properties in the future.  
35  
36

37  
38 27 Clinicians and parents who need guidance to set realistic therapy goals and to understand future  
39 intervention requirements benefit from understanding a test's predictive ability. The NSMDA and the  
40 MABC-2 are the only tools that have demonstrated long term ( $\geq 4$  years follow up) predictive validity, while  
41 the Bayley-III has good predictive validity at 2 years for future movement difficulties and for the diagnosis  
42 of cerebral palsy at 4 years. However, further research into the long-term predictive validity of all included  
43 gross motor assessment tools is warranted.  
44  
45

1 While validity and reliability should guide selection of assessment tools, clinical utility must also be taken  
2 into consideration. Most tests have ongoing costs associated with forms and equipment replacement,  
3 which may be prohibitive to some users. The NSMDA requires the therapist to handle the child for several  
4 items which should be considered in relation to manual handling policies of institutions. Assessment  
5 burden for children and families should also be taken into consideration when selecting an assessment  
6 tools. Younger children are more likely to be distracted and may not understand test items as well, which  
7 may also increase assessment times<sup>30</sup>.

8 When a new edition of an assessment tools is released resulting in a change in age groups, scoring or tasks  
9 it is insufficient to rely on the psychometric assessments that were performed on the original test. The  
10 MABC-2 manual provides justification for the inclusion of reliability and validity assessment of the original  
11 MABC<sup>14</sup>, however, owing to the significant changes in age groups and tasks between editions these were  
12 not included for the analysis of the MABC-2 in this review. Two studies quoted in the MABC-2 manual to  
13 support the validity and reliability are both unpublished works and as such are also unable to be included  
14 in this systematic review. This could indicate a publication for the MABC-2.

15 The thorough methodological assessment of the included articles using the COSMIN checklist should be  
16 seen as a strength of this paper, as should the range of assessment tools included in this review. While it  
17 has previously been argued that the 'worst score counts' criteria in the COSMIN creates a floor effect<sup>50</sup>,  
18 the COSMIN authors argue that only 'fatal flaws' contribute to an overall score of poor<sup>10</sup>. There are few  
19 tools available to assess the psychometric properties of assessment tools and arguably none so robustly  
20 validated as the COSMIN.

21 There are many appropriate gross motor assessment tools available for use in research and clinical settings  
22 today. Most of the available tools demonstrate adequate validity and reliability in children aged 2-12 and  
23 as such the authors do not believe that new assessment tools need to be developed for use. There is scope  
24 however to improve the evidence of inter and intra-rater reliability and predictive validity should be  
25 ascertained over a longer period of time and with greater methodological rigour. Tools also need clearer  
26 assessment of their responsiveness to change to assist clinicians and researchers with outcome measure  
27 selection. Researchers should be mindful of the methods they use to assess validity and reliability. Clarity  
28 of reporting, statistical methods and sample sizes should be carefully considered to ensure the highest  
29 quality of evidence.

## Conclusion

Currently available gross motor assessment tools for children have good to excellent content and construct validity. The BOT-2, MABC-2, PDMS-2 and TGMD-2 are the most reliable assessments in this age group. The Bayley-III has the best predictive validity at 2 years of age, and the NSMDA and the MABC-2 both have good predictive validity at 4 years of age. There is scope for further research into the predictive validity, reliability and responsiveness of gross motor assessment tools in preschool and school aged children. In practice clinicians should choose assessments with consideration of their psychometric properties in the context of the child that they are assessing.

### Author Contributions

All individuals listed as authors meet the appropriate authorship criteria and have approved the acknowledgement of their contributions. The primary author, Ms Griffiths was responsible for the drafting of the paper and liaising with the co-authors on findings and conclusions. Ms Toovey contributed to the paper through interpretation of data, completing methodological assessments and revising manuscript content throughout its development. A/Profs Morgan and Spittle both contributed to the paper through assisting with the development of research design, interpretation of data and revising manuscript content through its development.

### Data Sharing Statement

This paper includes data obtained from reviewing papers of published manuscripts. Data can be accessed by contacting the primary author.

## Figures

Figure 1. PRISMA flow diagram detailing study selection

Figure 2. Test re-test reliability of gross motor assessment tools

Figure 2 legend: BOT-2, Bruininks-Oseretsky Test of Motor Proficiency 2<sup>nd</sup> edition<sup>13</sup>; MABC-2, Movement Assessment Battery for Children 2<sup>nd</sup> edition<sup>14</sup>; PDMS-2, Peabody Developmental Motor Scales 2<sup>nd</sup> edition<sup>17</sup>; TGMD-II, Test of Gross Motor Development 2<sup>nd</sup> edition<sup>18</sup>.

- 1     1     Figure 3. Inter and interrater reliability of gross motor assessment tools
- 2
- 3     2     Figure 3 legend: MABC-2, Movement Assessment Battery for Children 2<sup>nd</sup> edition <sup>14</sup>; TGMD-II, Test of Gross
- 4     3     Motor Development 2<sup>nd</sup> edition <sup>18</sup>
- 5
- 6
- 7     4
- 8
- 9
- 10    5
- 11
- 12
- 13
- 14
- 15
- 16
- 17
- 18
- 19
- 20
- 21
- 22
- 23
- 24
- 25
- 26
- 27
- 28
- 29
- 30
- 31
- 32
- 33
- 34
- 35
- 36
- 37
- 38
- 39
- 40
- 41
- 42
- 43
- 44
- 45
- 46
- 47
- 48
- 49
- 50
- 51
- 52
- 53
- 54
- 55
- 56
- 57
- 58
- 59
- 60

For peer review only

## References

1. Piek JP, Baynam GB, Barrett NC. The relationship between fine and gross motor ability, self-perceptions and self-worth in children and adolescents. *Human Movement Science* 2006;25(1):65-75. doi: <http://dx.doi.org/10.1016/j.humov.2005.10.011>
2. World Health Organization. International Classification of Functioning, Disability and Health: ICF: World Health Organization 2001.
3. Magalhaes LC, Cardoso AA, Missiuna C. Activities and participation in children with developmental coordination disorder: a systematic review. *Research in developmental disabilities* 2011;32(4):1309-16. doi: 10.1016/j.ridd.2011.01.029 [published Online First: 2011/02/19]
4. Spittle AJ, Spencer-Smith MM, Eeles AL, et al. Does the Bayley-III Motor Scale at 2 years predict motor outcome at 4 years in very preterm children? *Developmental Medicine And Child Neurology* 2013;55(5):448-52. doi: 10.1111/dmcn.12049
5. Logan SW, Robinson LE, Getchell N. The Comparison of Performances of Preschool Children on Two Motor Assessments. *Perceptual and Motor Skills* 2011;113(3):715-23.
6. Venetsanou F, Kambas A. Environmental factors affecting preschoolers' motor development. *Early Childhood Education Journal* 2010;37(4):319-27.
7. Mokkink LB, Terwee CB, Patrick DL, et al. The COSMIN study reached international consensus on taxonomy, terminology, and definitions of measurement properties for health-related patient-reported outcomes. *Journal of clinical epidemiology* 2010;63(7):737-45. doi: 10.1016/j.jclinepi.2010.02.006 [published Online First: 2010/05/25]
8. Slater LM, Hillier SL, Civetta LR. The clinimetric properties of performance-based gross motor tests used for children with developmental coordination disorder: A systematic review. *PEDIATRIC PHYSICAL THERAPY* 2010;22(2):170.
9. Brown T, Lalor A. The Movement Assessment Battery for Children—Second Edition (MABC-2): A Review and Critique. *Physical & Occupational Therapy in Pediatrics* 2009;29(1):86-103.
10. Terwee CB, Mokkink LB, Knol DL, et al. Rating the methodological quality in systematic reviews of studies on measurement properties: a scoring system for the COSMIN checklist. *Quality of life research : an international journal of quality of life aspects of treatment, care and rehabilitation* 2012;21(4):651-7. doi: 10.1007/s11136-011-9960-1 [published Online First: 2011/07/07]
11. Law M. Outcome measures rating form. Ontario, Canada: CanChild Centre for Disability Research, 2004.
12. Bayley N. Bayley Scales of Infant Development and Toddler Development: Technical Manual: The PsychCorp 2006.
13. Bruininks R, Bruininks B. Bruininks-Oseretsky Test of Motor Proficiency—2nd Edition (BOT-2): Manual. Circle Pines: MN: AGS Publishing 2005.
14. Henderson SE, Sugden DA, Barnett AL. Movement assessment battery for children-2: Movement ABC-2: Examiner's manual: Pearson 2007.

- 1 15. McCarron LT. MAND: McCarron assessment of neuromuscular development, fine and gross motor abilities:  
2 McCarron-Dial Systems, Incorporated 1997.
- 3 16. Burns YR. N.S.M.D.A Physiotherapy Assessment for Infants and Young Children Second Edition. Brisbane,  
4 Queensland: CopyRight Publishing Company 2014.
- 5 17. Folio M, Fewell R. Peabody Developmental Motor Scales. Examiner's Manual . 2nd Edition. Austin, Texas.:  
6 Pro-Ed. 2000.
- 7 18. Ulrich DA. Test of gross motor development-2. *Austin: Prod-Ed* 2000
- 8 19. Rudd J, Butson ML, Barnett L, et al. A holistic measurement model of movement competency in children.  
9 *Journal of Sports Sciences* 2016;34(5):477-85.
- 10 20. Valentini NC. Validity and reliability of the TGMD-2 for Brazilian children. *Journal of Motor Behavior*  
11 2012;44(4):275-80.
- 12 21. Houwen S, Hartman E, Jonker L, et al. Reliability and validity of the TGMD-2 in primary-school-age children  
13 with visual impairments. *Adapt Phys Act Q* 2010;27(2):143-59.
- 14 22. Wong KYA, Yin Cheung S. Confirmatory factor analysis of the Test of Gross Motor Development-2.  
15 *Measurement in Physical Education & Exercise Science* 2010;14(3):202-09. doi:  
16 10.1080/10913671003726968
- 17 23. Simons J, Daly D, Theodorou F, et al. Validity and reliability of the TGMD-2 in 7-10-year-old Flemish  
18 children with intellectual disability. *Adapted physical activity quarterly : APAQ* 2008;25(1):71-82.
- 19 24. Hua J, Gu G, Meng W, et al. Age band 1 of the Movement Assessment Battery for Children-Second Edition:  
20 exploring its usefulness in mainland China. *Research in developmental disabilities* 2013;34(2):801-8.
- 21 25. Niemeijer AS, van Waelvelde H, Smits-Engelsman BC. Crossing the North Sea seems to make DCD  
22 disappear: cross-validation of Movement Assessment Battery for Children-2 norms. *Hum Mov Sci*  
23 2015;39:177-88. doi: 10.1016/j.humov.2014.11.004
- 24 26. Visser L, Ruiters SAJ, Van der Meulen BF, et al. Low verbal assessment with the Bayley-III. *Research in*  
25 *developmental disabilities* 2015;36:230-43.
- 26 27. Wuang YP, Su CY. Reliability and responsiveness of the Bruininks-Oseretsky Test of Motor Proficiency-  
27 Second Edition in children with intellectual disability. *Research in developmental disabilities* 2009;30(5):847-  
28 55.
- 29 28. Wuang YP, Su CY, Huang MH. Psychometric comparisons of three measures for assessing motor functions  
30 in preschoolers with intellectual disabilities. *Journal of Intellectual Disability Research* 2012;56(6):567-78.
- 31 29. Ellinoudis T, Evaggelinou C, Kourtessis T, et al. Reliability and validity of age band 1 of the Movement  
32 Assessment Battery for Children--second edition. *Research in developmental disabilities* 2011;32(3):1046-51.  
33 doi: <http://dx.doi.org/10.1016/j.ridd.2011.01.035>
- 34 30. Smits-Engelsman BCM, Niemeijer AS, van Waelvelde H. Is the Movement Assessment Battery for Children-  
35 2nd edition a reliable instrument to measure motor performance in 3 year old children? *Research in*  
36 *developmental disabilities* 2011;32(4):1370-77.

- 1 31. Holm I, Tveter AT, Aulie VS, et al. High intra- and inter-rater chance variation of the movement assessment  
2 battery for children 2, ageband 2. *Research in developmental disabilities* 2013;34(2):795-800.
- 3 32. Kita Y, Suzuki K, Hirata S, et al. Applicability of the Movement Assessment Battery for Children-Second  
4 Edition to Japanese children: A study of the Age Band 2. *Brain & Development* 2016;38(8):706-13.
- 5 33. Griffiths A, Morgan P, Anderson PJ, et al. Predictive value of the Movement Assessment Battery for  
6 Children - Second Edition at 4 years, for motor impairment at 8 years in children born preterm. *Dev Med  
7 Child Neurol* 2017;59(5):490-96. doi: 10.1111/dmcn.13367 [published Online First: 2017/01/10]
- 8 34. Schulz J, Henderson SE, Sugden DA, et al. Structural validity of the Movement ABC-2 test: factor structure  
9 comparisons across three age groups. *Research in developmental disabilities* 2011;32(4):1361-9.
- 10 35. Valentini NC, Ramalho MH, Oliveira MA. Movement assessment battery for children-2: translation,  
11 reliability, and validity for Brazilian children. *Research in developmental disabilities* 2014;35(3):733-40. doi:  
12 <http://dx.doi.org/10.1016/j.ridd.2013.10.028>
- 13 36. Wuang YP, Su JH, Su CY. Reliability and responsiveness of the Movement Assessment Battery for Children-  
14 Second Edition Test in children with developmental coordination disorder. *Developmental Medicine & Child  
15 Neurology* 2012;54(2):160-5.
- 16 37. Hands B, Larkin D, Rose E. The psychometric properties of the McCarron Assessment of Neuromuscular  
17 Development as a longitudinal measure with Australian youth. *Human Movement Science* 2013;32(3):485-  
18 97.
- 19 38. Danks M, Maideen MF, Burns YR, et al. The long-term predictive validity of early motor development in  
20 "apparently normal" ELBW survivors. *Early Human Development* 2012;88(8):637-41.
- 21 39. MacDonald J, Burns Y. Performance on the NSMDA During the First and Second Year of Life to Predict  
22 Functional Ability at the Age Of 4 in Children with Cerebral Palsy. *Hong Kong Physiotherapy Journal*  
23 2005;23(1):40-45. doi: 10.1016/S1013-7025(09)70058-2
- 24 40. Burns YR, Ensbey RM, Norrie MA. The Neuro-sensory motor developmental assessment part 1:  
25 development and administration of the test. *Australian Journal of Physiotherapy* 1989;35(3):141-49.
- 26 41. Burns YR, Ensbey RM, Norrie MA. The neuro-sensory motor developmental assessment part II: predictive  
27 and concurrent validity. *Australian Journal of Physiotherapy* 1989;35(3):151-57.
- 28 42. Barnett LM, Minto C, Lander N, et al. Interrater reliability assessment using the Test of Gross Motor  
29 Development-2. *Journal of Science and Medicine in Sport* 2014;17(6):667-70. doi:  
30 <http://dx.doi.org/10.1016/j.jsams.2013.09.013>
- 31 43. Farrokhi A, Zareh Zadeh M, Karimi Alvar L, et al. Reliability and validity of test of gross motor development-  
32 2 (Ulrich, 2000) among 3-10 aged children of Tehran City. *Journal of Physical Education and Sports  
33 Management* 2014;5(2):18-28. doi: 10.5897/JPESM12.003
- 34 44. Kim Y, Park I, Kang M. Examining rater effects of the TGMD-2 on children with intellectual disability. *Adapt  
35 Phys Act Q* 2012;29(4):346-65.
- 36 45. Kim CI, Han DW, Park IH. Reliability and validity of the test of gross motor development-II in Korean  
37 preschool children: applying AHP. *Research in developmental disabilities* 2014;35(4):800-7.



- 1 46. Wuang YP, Lin YH, Su CY. Rasch analysis of the Bruininks-Oseretsky Test of Motor Proficiency-Second  
2 Edition in intellectual disabilities. *Research in developmental disabilities* 2009;30(6):1132-44.
- 3 47. Spittle AJ, Doyle LW, Boyd RN. A systematic review of the clinimetric properties of neuromotor  
4 assessments for preterm infants during the first year of life. *Dev Med Child Neurol* 2008;50(4):254-66. doi:  
5 10.1111/j.1469-8749.2008.02025.x [published Online First: 2008/01/15]
- 6 48. McDowell I. Measuring health: a guide to rating scales and questionnaires: Oxford university press 2006.
- 7 49. Cools W, De Martelaer K, Samaey C, et al. Movement skill assessment of typically developing preschool  
8 children: a review of seven movement skill assessment tools.(Report). *Journal of Sports Science and Medicine*  
9 2009;8(2):154.
- 10 50. Adair B, Said CM, Rodda J, et al. Psychometric properties of functional mobility tools in hereditary spastic  
11 paraplegia and other childhood neurological conditions. *Developmental Medicine & Child Neurology*  
12 2012;54(7):596-605.





Figure 1. PRISMA flow diagram detailing study selection

195x256mm (300 x 300 DPI)



Figure 2. Test re-test reliability of gross motor assessment tools  
Figure 2 legend: BOT-2, Bruininks-Oseretsky Test of Motor Proficiency 2nd edition 13; MABC-2, Movement Assessment Battery for Children 2nd edition 14; PDMS-2, Peabody Developmental Motor Scales 2nd edition 17; TGMD-II, Test of Gross Motor Development 2nd edition 18.

139x102mm (300 x 300 DPI)

Only

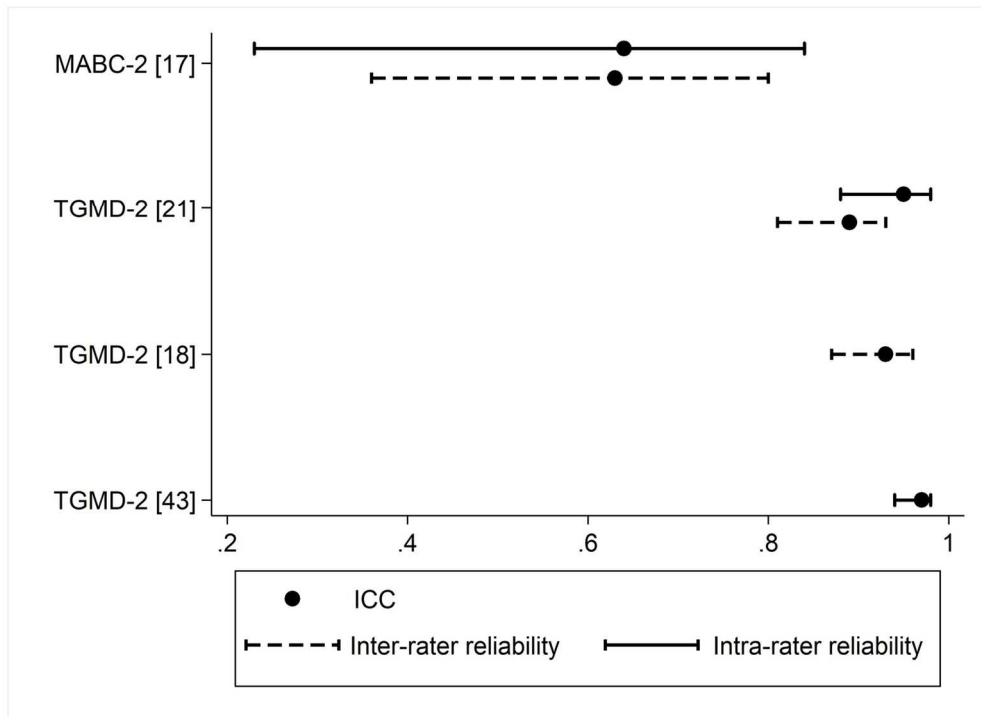

Figure 3. Inter and interrater reliability of gross motor assessment tools  
 Figure 3 legend: MABC-2, Movement Assessment Battery for Children 2nd edition 14; TGMD-II, Test of Gross Motor Development 2nd edition 18

139x102mm (300 x 300 DPI)

Supplementary Table 1. OVID Medline database search (1996 to present)

| Search No | Search                                             | Yield 5/5/17    |
|-----------|----------------------------------------------------|-----------------|
| 1         | Child/                                             | 811722          |
| 2         | Child, Preschool/                                  | 457484          |
| 3         | paediatric*.mp.                                    | 45528           |
| 4         | Motor Skills/                                      | 12726           |
| 5         | Motor Activity/                                    | 64838           |
| 6         | gross motor.mp.                                    | 3821            |
| 7         | Psychomotor Disorders/                             | 2609            |
| 8         | Motor Skills Disorders/                            | 2580            |
| 9         | Developmental Disabilities/                        | 13484           |
| 10        | developmental coordination disorder.mp.            | 845             |
| 11        | Movement/ph (physiology)                           | 22342           |
| 12        | Questionnaires/                                    | 336296          |
| 13        | "Outcome Assessment (Health Care)"/                | 57491           |
| 14        | scale*.mp.                                         | 608566          |
| 15        | instrument*.mp.                                    | 197131          |
| 16        | outcome*.mp.                                       | 1813266         |
| 17        | measure*.mp.                                       | 2255187         |
| 18        | evaluat*.mp.                                       | 2552240         |
| 19        | assess*.mp.                                        | 2273012         |
| 20        | "Task Performance and Analysis"/                   | 22017 (or 5969) |
| 21        | Reproducibility of Results"/                       | 319899          |
| 22        | 1 or 2 or 3                                        | 936097          |
| 23        | 4 or 5 or 6 or 7 or 8 or 9 or 10 or 11             | 116200          |
| 24        | 12 or 13 or 14 or 15 or 16 or 17 or 18 or 19 or 20 | 6579985         |
| 25        | 21 and 22 and 23 and 24                            | 1152            |

Supplementary table 2: CINAHL plus database search

| <b>Search Number</b> | <b>Search</b>                                                  | <b>Yield</b>  |
|----------------------|----------------------------------------------------------------|---------------|
|                      |                                                                | <b>2/7/17</b> |
| <b>S1</b>            | (MH "Child")                                                   | 338732        |
| <b>S2</b>            | (MH "Child, Preschool")                                        | 156847        |
| <b>S3</b>            | "paediatric"                                                   | 14351         |
| <b>S4</b>            | (MH "Motor Skills")                                            | 7420          |
| <b>S5</b>            | (MH "Motor Activity")                                          | 9664          |
| <b>S6</b>            | (MH "Psychomotor Performance")                                 | 9457          |
| <b>S7</b>            | (MH "Motor Skills Disorders")                                  | 1515          |
| <b>S8</b>            | (MH "Developmental Disabilities")                              | 7114          |
| <b>S9</b>            | (MH "Child Development Disorders")                             | 1708          |
| <b>S10</b>           | "gross motor"                                                  | 2234          |
| <b>S11</b>           | (MH "Clinical Assessment Tools")                               | 110291        |
| <b>S12</b>           | (MH "Outcome Assessment")                                      | 29335         |
| <b>S13</b>           | (MH Physical Therapy Assessment")                              | 2027          |
| <b>S14</b>           | "scale"                                                        | 290924        |
| <b>S15</b>           | instrument*                                                    | 113984        |
| <b>S16</b>           | outcome*                                                       | 602132        |
| <b>S17</b>           | measure*                                                       | 534465        |
| <b>S18</b>           | evaluat*                                                       | 760447        |
| <b>S19</b>           | assess*                                                        | 710533        |
| <b>S20</b>           | (MH Reliability and Validity")                                 | 11043         |
| <b>S21</b>           | S1 OR S2 OR S3                                                 | 387809        |
| <b>S22</b>           | S4 OR S5 OR S6 OR S7 OR S8 OR S9 OR S10                        | 35562         |
| <b>S23</b>           | S11 OR S12 OR S13 OR S14 OR S15 OR S16 OR S17 OR<br>S18 OR S19 | 1763829       |
| <b>S24</b>           | S20 AND S21 AND S22 AND S23                                    | 144           |

Supplementary table 3: EMBASE database search (1974-present)

| Search No | Search                                                                  | Search Yield<br>5/5/17 |
|-----------|-------------------------------------------------------------------------|------------------------|
| 1         | Child/                                                                  | 1346641                |
| 2         | Preschool child/                                                        | 457981                 |
| 3         | paediatric*.mp.                                                         | 86036                  |
| 4         | Motor performance/                                                      | 57571                  |
| 5         | Motor Activity/                                                         | 39751                  |
| 6         | psychomotor performance                                                 | 19515                  |
| 7         | Motor development/                                                      | 4906                   |
| 8         | Motor dysfunction/                                                      | 53155                  |
| 9         | Developmental disorder/                                                 | 30473                  |
| 10        | Gross motor.mp.                                                         | 6840                   |
| 11        | Outcome Assessment/                                                     | 358121                 |
| 12        | Outcome measure.mp.                                                     | 60507                  |
| 13        | Questionnaire/                                                          | 513199                 |
| 14        | Task performance/                                                       | 125167                 |
| 15        | Functional assessment/                                                  | 55415                  |
| 16        | Clinical assessment tool/                                               | 19865                  |
| 17        | evaluat*.mp.                                                            | 3874341                |
| 18        | instrument*.mp.                                                         | 515930                 |
| 19        | outcome*.mp.                                                            | 2425627                |
| 20        | Assess*.mp.                                                             | 3815907                |
| 21        | Scale*.mp.                                                              | 903216                 |
| 22        | Measure*.mp.                                                            | 3444366                |
| 23        | Measurement accuracy/                                                   | 18209                  |
| 24        | Measurement repeatability/                                              | 2849                   |
| 25        | Reproducibility/                                                        | 173988                 |
| 26        | Validity/                                                               | 40192                  |
| 27        | Reliability/                                                            | 114002                 |
| 28        | 1 or 2 or 3                                                             | 1535605                |
| 29        | 4 or 5 or 6 or 7 or 8 or 9 or 10                                        | 195237                 |
| 30        | 11 or 12 or 13 or 14 or 15 or 16 or 17 or 18 or<br>19 or 20 or 21 or 22 | 10121631               |
| 31        | 23 or 24 or 25 or 26 or 27                                              | 324779                 |
| 32        | 28 and 29 and 30 and 31                                                 | 1105                   |

Supplementary table 4. Allied and Complementary Medicine Database (AMED) database search: (1985-present)

| Search Number | Search                                                 | Yield 2/7/17 |
|---------------|--------------------------------------------------------|--------------|
| 1             | Child/                                                 | 15192        |
| 2             | Child preschool/                                       | 1223         |
| 3             | Adolescent/                                            | 3979         |
| 4             | paediatric*.mp.                                        | 812          |
| 5             | 1 or 2 or 3 or 4                                       | 18429        |
| 6             | Motor skills/                                          | 1220         |
| 7             | Motor activity/                                        | 1468         |
| 8             | Gross motor*.mp.                                       | 599          |
| 9             | Psychomotor disorders/                                 | 1067         |
| 10            | Developmental disabilities/ or motor skills disorders/ | 947          |
| 11            | Developmental coordination disorder*.mp.               | 219          |
| 12            | DCD.mp.                                                | 113          |
| 13            | 6 or 7 or 8 or 9 or 10 or 11 or 12                     | 4982         |
| 14            | 5 and 13                                               | 1510         |
| 15            | Clinical assessment scales/                            | 4318         |
| 16            | Questionnaires/                                        | 4123         |
| 17            | Disability evaluation/                                 | 7023         |
| 18            | Outcome measure*.mp/                                   | 9845         |
| 19            | Outcome*.mp.                                           | 38379        |
| 20            | Assess*.mp.                                            | 43680        |
| 21            | Scale*.mp.                                             | 17562        |
| 22            | Evaluat*.mp.                                           | 40621        |
| 23            | 15 or 16 or 17 or 18 or 19 or 20 or 21 or 22           | 93570        |
| 24            | 14 and 23                                              | 865          |
| 25            | Measurement/                                           | 1629         |
| 26            | Reproducibility of results.mp/                         | 2241         |
| 27            | "Consistency and reliability"/                         | 1898         |
| 28            | Statistics/                                            | 1075         |
| 29            | Specificity.mp.                                        | 1241         |
| 30            | Sensitivity.mp.                                        | 2860         |
| 31            | "Predictive value of tests"/                           | 839          |
| 32            | 25 or 26 or 27 or 28 or 29 or 30 or 31                 | 10256        |
| 33            | 24 and 32                                              | 81           |

Supplementary table 5: Definition of terms

|                       | Measurement Property | Definition                                                                                                                                                           | Example/explanation                                                                                                                                                                                                                                                                                                                                                                   |
|-----------------------|----------------------|----------------------------------------------------------------------------------------------------------------------------------------------------------------------|---------------------------------------------------------------------------------------------------------------------------------------------------------------------------------------------------------------------------------------------------------------------------------------------------------------------------------------------------------------------------------------|
| <b>Validity</b>       | Content              | The degree to which an assessment tool's content measures the construct that it intends to measure <sup>7</sup>                                                      | Concerned with the relevance and comprehensiveness of the items included in the assessment tool                                                                                                                                                                                                                                                                                       |
|                       | Construct            | Measures the degree to which the scores obtained from the test are an adequate reflection of the construct to be measured <sup>7</sup>                               | Examples include structural validity (whether scores reflect the dimensionality of the construct), hypothesis testing (item construct validity) and cross-cultural validity (whether translated or culturally adapted assessments adequately reflect the original version) <sup>7</sup>                                                                                               |
|                       | Criterion            | Assesses whether or not the test scores reflect a 'gold standard' assessment <sup>7</sup>                                                                            | As there is no gold standard of assessment for gross motor function in children this is often assessed with correlations of scores obtained from two or three other frequently used tools.                                                                                                                                                                                            |
| <b>Reliability</b>    | Reliability          | Refers to the consistency of a test score regardless of the time between assessments (test-retest) or the person administering (intra and inter-rater) <sup>50</sup> | Usually measured with intraclass correlation coefficient (ICC), but can be measured using Cohen's kappa coefficient. Percentage agreement and Pearson's correlation coefficient do not incorporate error into the calculations and as such is not a true measure of agreement <sup>50</sup> . Scores > 0.80 are considered excellent, 0.60-0.79 adequate and <0.59 poor <sup>11</sup> |
|                       | Internal consistency | The degree of interrelatedness of an assessment tool's items <sup>7</sup>                                                                                            | Usually measured using Cronbach's alpha ( $\alpha$ ) <sup>7</sup> . scores > 0.70 demonstrates high relationship, 0.5 to 0.69 a moderate relationship, 0.26 to 0.49 a low relationship and < 0.26 little relationship <sup>50</sup> .                                                                                                                                                 |
|                       | Measurement Error    | Refers to the error obtained between measurements that cannot be attributed to the patients true change <sup>7</sup>                                                 | May be systematic or random error <sup>7</sup>                                                                                                                                                                                                                                                                                                                                        |
| <b>Responsiveness</b> | Responsiveness       | An assessment tool's ability to detect change over time in the construct it purports to measure <sup>7</sup>                                                         | This is central to a tools capacity to be used as an outcome measure.                                                                                                                                                                                                                                                                                                                 |



## Supplementary table 6: Excluded Assessment Tools

| Reason                                      | Assessments                                                                                                                                                                                                                         |
|---------------------------------------------|-------------------------------------------------------------------------------------------------------------------------------------------------------------------------------------------------------------------------------------|
| Manual not available in English             | Maastricht's Motor Test (MMT)<br>The Motor-Proficiency-Test for children between 4 and 6 years of age (MOT 4-6)<br>Zuk Assessment<br>Körperkoordinationstest für Kinder (KTK)                                                       |
| Cannot extract meaningful gross motor score | Early Intervention Developmental Profile (EIDP)<br>Neurological Developmental Exam<br>Preschooler Gross Motor Quality Scale (PGMQ)<br>The Malawi Developmental Assessment Tool (MDAT)<br>Dutch table tennis motor skills assessment |
| Screening Tool                              | Brief Assessment of Motor Function (BAMF)<br>The Motor Performance Checklist<br>Motor skill checklist (MSC)                                                                                                                         |
| Diagnosis specific/requires a diagnosis     | Assessment Battery for the Atypical Handicapped Child (VAB)<br>Video-based documentation and rating system of the motor behaviour of handicapped children                                                                           |
| Only assesses one motor domain (e.g. gait)  | Standardized Walking Obstacle Course (SWOC)<br>Timed floor to stand test                                                                                                                                                            |
| Manual not published/commercially available | Rapid Neurodevelopmental Assessment (RNDA)<br>Tufts Assessment of Motor Performance (TAMP)<br>Zurich Neuromotor Assessment (ZNA)                                                                                                    |

Supplementary table 7: Scoring and administration of assessment tools

| Assessment Tool                 | Scoring                                                                                                                                                    | Interpretation of scores                                                                                                           | Other                                                                                                            |
|---------------------------------|------------------------------------------------------------------------------------------------------------------------------------------------------------|------------------------------------------------------------------------------------------------------------------------------------|------------------------------------------------------------------------------------------------------------------|
| <b>Bayley-III</b> <sup>12</sup> | Motor score - gross (varying items) and fine motor (varying items) subscales. Binary score with reverse/discontinue rules                                  | Raw scores Composite scores Centile ranks Age equivalents Growth scores                                                            | Lends itself to multidisciplinary team testing.                                                                  |
| <b>BOT-2</b> <sup>13</sup>      | Fine manual (15 items) manual coordination (12 items) body coordination (16 items) strength and agility (10 items) subscales. Scoring differs for subtests | Raw scores Age adjusted standard scores Composite scores Centile ranks Age equivalents Descriptive categories. Complex conversions | Administration Easel includes instructions, diagrams and photos of test procedure                                |
| <b>MABC-2</b> <sup>14</sup>     | Manual dexterity (3 items), aiming & catching (2 items) and balance (3 items) subscales.                                                                   | Raw scores component scores centile ranks total test score traffic light system. Simple conversion                                 | Also Available: MABC-2 Checklist (screening tool) and intervention manual                                        |
| <b>MAND</b> <sup>15</sup>       | Fine motor (5 items) Gross motor (5 items)                                                                                                                 | Raw scores Scaled scores converted to an NDI. Factor scores. Complex conversions                                                   | Case studies included in manual for hyperactivity, encephalitis, mild head trauma, CP and muscular dystrophy     |
| <b>NSMDA</b> <sup>16</sup>      | Functional grade given for each subscale, which is combined to create an overall score.                                                                    | Indicates: normal range, minimal dysfunction, mild problems, moderate, severe or profound disability                               | Sections for comment on strengths, behavioural state during testing, musculoskeletal system and recommendations. |
| <b>PDMS-2</b> <sup>17</sup>     | GM: Stationary (30 items), locomotion (89 items), object manipulation (24 item). FM: grasping(26 items) , visual-motor integration (72 items)              | Raw scores, Age equivalent, centile rank. Standard scores (subtests) Composite quotient. Complex conversions.                      | Motor activities program (intervention ideas)                                                                    |
| <b>TGMD-2</b> <sup>18</sup>     | Locomotion (6 items) and Object Control (6 items). Separate male/female norms for object control subset                                                    | Raw scores, standard scores, percentile rank, age equivalent, Gross Motor Quotient. Simple conversion.                             | Simple to administer                                                                                             |

Bayley-III, Bayley Scale of Infant and Toddler Development 3<sup>rd</sup> edition <sup>12</sup>; BOT-2, Bruininks-Oseretsky Test of Motor Proficiency 2<sup>nd</sup> edition <sup>13</sup>; MABC-2, Movement Assessment Battery for Children 2<sup>nd</sup> edition <sup>14</sup>; MAND, McCarron Assessment of Neuromuscular Development <sup>15</sup>; NSMDA, Neurological Sensory Motor Developmental Assessment <sup>16</sup>; PDMS-2, Peabody Developmental Motor Scales 2<sup>nd</sup> edition <sup>17</sup>; TGMD-II, Test of Gross Motor Development 2<sup>nd</sup> edition <sup>18</sup>; GM, Gross Motor; FM, Fine Motor; NDI, Neurodevelopmental Index

1  
2  
3  
4  
5  
6  
7  
8  
9  
10  
11  
12  
13  
14  
15  
16  
17  
18  
19  
20  
21  
22  
23  
24  
25  
26  
27  
28  
29  
30  
31  
32  
33  
34  
35  
36  
37  
38  
39  
40  
41  
42  
43  
44  
45  
46  
47  
48  
49  
50  
51  
52  
53  
54  
55  
56  
57  
58  
59  
60

For peer review only

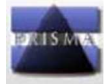

# PRISMA 2009 Checklist

| Section/topic                      | #  | Checklist item                                                                                                                                                                                                                                                                                              | Reported on page #             |
|------------------------------------|----|-------------------------------------------------------------------------------------------------------------------------------------------------------------------------------------------------------------------------------------------------------------------------------------------------------------|--------------------------------|
| <b>TITLE</b>                       |    |                                                                                                                                                                                                                                                                                                             |                                |
| Title                              | 1  | Identify the report as a systematic review, meta-analysis, or both.                                                                                                                                                                                                                                         | 1 Title page                   |
| <b>ABSTRACT</b>                    |    |                                                                                                                                                                                                                                                                                                             |                                |
| Structured summary                 | 2  | Provide a structured summary including, as applicable: background; objectives; data sources; study eligibility criteria, participants, and interventions; study appraisal and synthesis methods; results; limitations; conclusions and implications of key findings; systematic review registration number. | 2                              |
| <b>INTRODUCTION</b>                |    |                                                                                                                                                                                                                                                                                                             |                                |
| Rationale                          | 3  | Describe the rationale for the review in the context of what is already known.                                                                                                                                                                                                                              | 4-5                            |
| Objectives                         | 4  | Provide an explicit statement of questions being addressed with reference to participants, interventions, comparisons, outcomes, and study design (PICOS).                                                                                                                                                  | 5                              |
| <b>METHODS</b>                     |    |                                                                                                                                                                                                                                                                                                             |                                |
| Protocol and registration          | 5  | Indicate if a review protocol exists, if and where it can be accessed (e.g., Web address), and, if available, provide registration information including registration number.                                                                                                                               | -                              |
| Eligibility criteria               | 6  | Specify study characteristics (e.g., PICOS, length of follow-up) and report characteristics (e.g., years considered, language, publication status) used as criteria for eligibility, giving rationale.                                                                                                      | 5-6                            |
| Information sources                | 7  | Describe all information sources (e.g., databases with dates of coverage, contact with study authors to identify additional studies) in the search and date last searched.                                                                                                                                  | 5                              |
| Search                             | 8  | Present full electronic search strategy for at least one database, including any limits used, such that it could be repeated.                                                                                                                                                                               | 5 and suppl. tables 1, 2, 3, 4 |
| Study selection                    | 9  | State the process for selecting studies (i.e., screening, eligibility, included in systematic review, and, if applicable, included in the meta-analysis).                                                                                                                                                   | 5-6                            |
| Data collection process            | 10 | Describe method of data extraction from reports (e.g., piloted forms, independently, in duplicate) and any processes for obtaining and confirming data from investigators.                                                                                                                                  | 6-7                            |
| Data items                         | 11 | List and define all variables for which data were sought (e.g., PICOS, funding sources) and any assumptions and simplifications made.                                                                                                                                                                       | 6-7                            |
| Risk of bias in individual studies | 12 | Describe methods used for assessing risk of bias of individual studies (including specification of whether this was done at the study or outcome level), and how this information is to be used in any data synthesis.                                                                                      | 6                              |
| Summary measures                   | 13 | State the principal summary measures (e.g., risk ratio, difference in means).                                                                                                                                                                                                                               | 7                              |
| Synthesis of results               | 14 | Describe the methods of handling data and combining results of studies, if done, including measures of consistency (e.g., $I^2$ ) for each meta-analysis.                                                                                                                                                   | -                              |

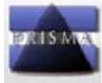

# PRISMA 2009 Checklist

Page 1 of 2

| Section/topic                 | #  | Checklist item                                                                                                                                                                                           | Reported on page #                                                                                  |
|-------------------------------|----|----------------------------------------------------------------------------------------------------------------------------------------------------------------------------------------------------------|-----------------------------------------------------------------------------------------------------|
| Risk of bias across studies   | 15 | Specify any assessment of risk of bias that may affect the cumulative evidence (e.g., publication bias, selective reporting within studies).                                                             | 24, 25                                                                                              |
| Additional analyses           | 16 | Describe methods of additional analyses (e.g., sensitivity or subgroup analyses, meta-regression), if done, indicating which were pre-specified.                                                         | -                                                                                                   |
| <b>RESULTS</b>                |    |                                                                                                                                                                                                          |                                                                                                     |
| Study selection               | 17 | Give numbers of studies screened, assessed for eligibility, and included in the review, with reasons for exclusions at each stage, ideally with a flow diagram.                                          | Figure 1 + page 7                                                                                   |
| Study characteristics         | 18 | For each study, present characteristics for which data were extracted (e.g., study size, PICOS, follow-up period) and provide the citations.                                                             | Table 1 – page 9 + Suppl table 7                                                                    |
| Risk of bias within studies   | 19 | Present data on risk of bias of each study and, if available, any outcome level assessment (see item 12).                                                                                                | 11 + Table 3 (page 14-15)                                                                           |
| Results of individual studies | 20 | For all outcomes considered (benefits or harms), present, for each study: (a) simple summary data for each intervention group (b) effect estimates and confidence intervals, ideally with a forest plot. | 7-8, 11-12, 17 + Table 2 page 13, Table 4 page 18, Table 5 page 19, Table 6 page 20 + Figures 2 & 3 |
| Synthesis of results          | 21 | Present results of each meta-analysis done, including confidence intervals and measures of consistency.                                                                                                  | -                                                                                                   |
| Risk of bias across studies   | 22 | Present results of any assessment of risk of bias across studies (see Item 15).                                                                                                                          | -                                                                                                   |
| Additional analysis           | 23 | Give results of additional analyses, if done (e.g., sensitivity or subgroup analyses, meta-regression [see Item 16]).                                                                                    | -                                                                                                   |
| <b>DISCUSSION</b>             |    |                                                                                                                                                                                                          |                                                                                                     |
| Summary of evidence           | 24 | Summarize the main findings including the strength of evidence for each main outcome; consider their relevance to key groups (e.g., healthcare providers, users, and policy makers).                     | 22-25                                                                                               |

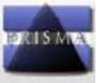

# PRISMA 2009 Checklist

1  
2  
3  
4  
5  
6  
7  
8  
9  
10  
11  
12  
13  
14  
15  
16  
17  
18  
19  
20  
21  
22  
23  
24  
25  
26  
27  
28  
29  
30  
31  
32  
33  
34  
35  
36  
37  
38  
39  
40  
41  
42  
43  
44  
45  
46  
47

|                |    |                                                                                                                                                               |    |
|----------------|----|---------------------------------------------------------------------------------------------------------------------------------------------------------------|----|
| Limitations    | 25 | Discuss limitations at study and outcome level (e.g., risk of bias), and at review-level (e.g., incomplete retrieval of identified research, reporting bias). | 24 |
| Conclusions    | 26 | Provide a general interpretation of the results in the context of other evidence, and implications for future research.                                       | 26 |
| <b>FUNDING</b> |    |                                                                                                                                                               |    |
| Funding        | 27 | Describe sources of funding for the systematic review and other support (e.g., supply of data); role of funders for the systematic review.                    | 1  |

From: Moher D, Liberati A, Tetzlaff J, Altman DG, The PRISMA Group (2009). Preferred Reporting Items for Systematic Reviews and Meta-Analyses: The PRISMA Statement. PLoS Med 6(7): e1000097. doi:10.1371/journal.pmed1000097

For more information, visit: [www.prisma-statement.org](http://www.prisma-statement.org).
