# Supplementary material for: Psychometric properties of gross motor assessment tools for children: a systematic review
Source: PubMed Central journal article supplement — BMJ Open. 2018 Oct 27;8(10):e021734. doi: 10.1136/bmjopen-2018-021734 (PMC6224743; doi:10.1136/bmjopen-2018-021734), 2018-10-27
Supplement: bmjopen-2018-021734supp001.pdf [file bmjopen-2018-021734supp001.pdf]

Supplementary Table 1. OVID Medline database search (1996 to present)

| <b>Search No</b> | <b>Search</b>                                      | <b>Yield 5/5/17</b> |
|------------------|----------------------------------------------------|---------------------|
| 1                | Child/                                             | 811722              |
| 2                | Child, Preschool/                                  | 457484              |
| 3                | paediatric*.mp.                                    | 45528               |
| 4                | Motor Skills/                                      | 12726               |
| 5                | Motor Activity/                                    | 64838               |
| 6                | gross motor.mp.                                    | 3821                |
| 7                | Psychomotor Disorders/                             | 2609                |
| 8                | Motor Skills Disorders/                            | 2580                |
| 9                | Developmental Disabilities/                        | 13484               |
| 10               | developmental coordination disorder.mp.            | 845                 |
| 11               | Movement/ph (physiology)                           | 22342               |
| 12               | Questionnaires/                                    | 336296              |
| 13               | "Outcome Assessment (Health Care)"/                | 57491               |
| 14               | scale*.mp.                                         | 608566              |
| 15               | instrument*.mp.                                    | 197131              |
| 16               | outcome*.mp.                                       | 1813266             |
| 17               | measure*.mp.                                       | 2255187             |
| 18               | evaluat*.mp.                                       | 2552240             |
| 19               | assess*.mp.                                        | 2273012             |
| 20               | "Task Performance and Analysis"/                   | 22017 (or 5969)     |
| 21               | Reproducibility of Results"/                       | 319899              |
| 22               | 1 or 2 or 3                                        | 936097              |
| 23               | 4 or 5 or 6 or 7 or 8 or 9 or 10 or 11             | 116200              |
| 24               | 12 or 13 or 14 or 15 or 16 or 17 or 18 or 19 or 20 | 6579985             |
| 25               | 21 and 22 and 23 and 24                            | 1152                |
