# Supplementary material for: Psychometric properties of gross motor assessment tools for children: a systematic review
Source: PubMed Central journal article supplement — BMJ Open. 2018 Oct 27;8(10):e021734. doi: 10.1136/bmjopen-2018-021734 (PMC6224743; doi:10.1136/bmjopen-2018-021734), 2018-10-27
Supplement: bmjopen-2018-021734supp002.pdf [file bmjopen-2018-021734supp002.pdf]

Supplementary table 2: CINAHL plus database search

| <b>Search Number</b> | <b>Search</b>                                               | <b>Yield</b>  |
|----------------------|-------------------------------------------------------------|---------------|
|                      |                                                             | <b>2/7/17</b> |
| <b>S1</b>            | (MH "Child")                                                | 338732        |
| <b>S2</b>            | (MH "Child, Preschool")                                     | 156847        |
| <b>S3</b>            | "paediatric"                                                | 14351         |
| <b>S4</b>            | (MH "Motor Skills")                                         | 7420          |
| <b>S5</b>            | (MH "Motor Activity")                                       | 9664          |
| <b>S6</b>            | (MH "Psychomotor Performance")                              | 9457          |
| <b>S7</b>            | (MH "Motor Skills Disorders")                               | 1515          |
| <b>S8</b>            | (MH "Developmental Disabilities")                           | 7114          |
| <b>S9</b>            | (MH "Child Development Disorders")                          | 1708          |
| <b>S10</b>           | "gross motor"                                               | 2234          |
| <b>S11</b>           | (MH "Clinical Assessment Tools")                            | 110291        |
| <b>S12</b>           | (MH "Outcome Assessment")                                   | 29335         |
| <b>S13</b>           | (MH "Physical Therapy Assessment")                          | 2027          |
| <b>S14</b>           | "scale"                                                     | 290924        |
| <b>S15</b>           | instrument*                                                 | 113984        |
| <b>S16</b>           | outcome*                                                    | 602132        |
| <b>S17</b>           | measure*                                                    | 534465        |
| <b>S18</b>           | evaluat*                                                    | 760447        |
| <b>S19</b>           | assess*                                                     | 710533        |
| <b>S20</b>           | (MH "Reliability and Validity")                             | 11043         |
| <b>S21</b>           | S1 OR S2 OR S3                                              | 387809        |
| <b>S22</b>           | S4 OR S5 OR S6 OR S7 OR S8 OR S9 OR S10                     | 35562         |
| <b>S23</b>           | S11 OR S12 OR S13 OR S14 OR S15 OR S16 OR S17 OR S18 OR S19 | 1763829       |
| <b>S24</b>           | S20 AND S21 AND S22 AND S23                                 | 144           |
