# Supplementary material for: Psychometric properties of gross motor assessment tools for children: a systematic review
Source: PubMed Central journal article supplement — BMJ Open. 2018 Oct 27;8(10):e021734. doi: 10.1136/bmjopen-2018-021734 (PMC6224743; doi:10.1136/bmjopen-2018-021734), 2018-10-27
Supplement: bmjopen-2018-021734supp003.pdf [file bmjopen-2018-021734supp003.pdf]

Supplementary table 3: EMBASE database search (1974-present)

| <b>Search No</b> | <b>Search</b>                                                           | <b>Search Yield</b><br><b>5/5/17</b> |
|------------------|-------------------------------------------------------------------------|--------------------------------------|
| 1                | Child/                                                                  | 1346641                              |
| 2                | Preschool child/                                                        | 457981                               |
| 3                | paediatric*.mp.                                                         | 86036                                |
| 4                | Motor performance/                                                      | 57571                                |
| 5                | Motor Activity/                                                         | 39751                                |
| 6                | psychomotor performance                                                 | 19515                                |
| 7                | Motor development/                                                      | 4906                                 |
| 8                | Motor dysfunction/                                                      | 53155                                |
| 9                | Developmental disorder/                                                 | 30473                                |
| 10               | Gross motor.mp.                                                         | 6840                                 |
| 11               | Outcome Assessment/                                                     | 358121                               |
| 12               | Outcome measure.mp.                                                     | 60507                                |
| 13               | Questionnaire/                                                          | 513199                               |
| 14               | Task performance/                                                       | 125167                               |
| 15               | Functional assessment/                                                  | 55415                                |
| 16               | Clinical assessment tool/                                               | 19865                                |
| 17               | evaluat*.mp.                                                            | 3874341                              |
| 18               | instrument*.mp.                                                         | 515930                               |
| 19               | outcome*.mp.                                                            | 2425627                              |
| 20               | Assess*.mp.                                                             | 3815907                              |
| 21               | Scale*.mp.                                                              | 903216                               |
| 22               | Measure*.mp.                                                            | 3444366                              |
| 23               | Measurement accuracy/                                                   | 18209                                |
| 24               | Measurement repeatability/                                              | 2849                                 |
| 25               | Reproducibility/                                                        | 173988                               |
| 26               | Validity/                                                               | 40192                                |
| 27               | Reliability/                                                            | 114002                               |
| 28               | 1 or 2 or 3                                                             | 1535605                              |
| 29               | 4 or 5 or 6 or 7 or 8 or 9 or 10                                        | 195237                               |
| 30               | 11 or 12 or 13 or 14 or 15 or 16 or 17 or 18 or<br>19 or 20 or 21 or 22 | 10121631                             |
| 31               | 23 or 24 or 25 or 26 or 27                                              | 324779                               |
| 32               | 28 and 29 and 30 and 31                                                 | 1105                                 |
