# Supplementary material for: Psychometric properties of gross motor assessment tools for children: a systematic review
Source: PubMed Central journal article supplement — BMJ Open. 2018 Oct 27;8(10):e021734. doi: 10.1136/bmjopen-2018-021734 (PMC6224743; doi:10.1136/bmjopen-2018-021734), 2018-10-27
Supplement: bmjopen-2018-021734supp004.pdf [file bmjopen-2018-021734supp004.pdf]

Supplementary table 4. Allied and Complementary Medicine Database (AMED) database search: (1985-present)

| <b>Search Number</b> | <b>Search</b>                                          | <b>Yield 2/7/17</b> |
|----------------------|--------------------------------------------------------|---------------------|
| 1                    | Child/                                                 | 15192               |
| 2                    | Child preschool/                                       | 1223                |
| 3                    | Adolescent/                                            | 3979                |
| 4                    | paediatric*.mp.                                        | 812                 |
| 5                    | 1 or 2 or 3 or 4                                       | 18429               |
| 6                    | Motor skills/                                          | 1220                |
| 7                    | Motor activity/                                        | 1468                |
| 8                    | Gross motor*.mp.                                       | 599                 |
| 9                    | Psychomotor disorders/                                 | 1067                |
| 10                   | Developmental disabilities/ or motor skills disorders/ | 947                 |
| 11                   | Developmental coordination disorder*.mp.               | 219                 |
| 12                   | DCD.mp.                                                | 113                 |
| 13                   | 6 or 7 or 8 or 9 or 10 or 11 or 12                     | 4982                |
| 14                   | 5 and 13                                               | 1510                |
| 15                   | Clinical assessment scales/                            | 4318                |
| 16                   | Questionnaires/                                        | 4123                |
| 17                   | Disability evaluation/                                 | 7023                |
| 18                   | Outcome measure*.mp/                                   | 9845                |
| 19                   | Outcome*.mp.                                           | 38379               |
| 20                   | Assess*.mp.                                            | 43680               |
| 21                   | Scale*.mp.                                             | 17562               |
| 22                   | Evaluat*.mp.                                           | 40621               |
| 23                   | 15 or 16 or 17 or 18 or 19 or 20 or 21 or 22           | 93570               |
| 24                   | 14 and 23                                              | 865                 |
| 25                   | Measurement/                                           | 1629                |
| 26                   | Reproducibility of results.mp/                         | 2241                |
| 27                   | "Consistency and reliability"/                         | 1898                |
| 28                   | Statistics/                                            | 1075                |
| 29                   | Specificity.mp.                                        | 1241                |
| 30                   | Sensitivity.mp.                                        | 2860                |
| 31                   | "Predictive value of tests"/                           | 839                 |
| 32                   | 25 or 26 or 27 or 28 or 29 or 30 or 31                 | 10256               |
| 33                   | 24 and 32                                              | 81                  |
