# Supplementary material for: Psychometric properties of gross motor assessment tools for children: a systematic review
Source: PubMed Central journal article supplement — BMJ Open. 2018 Oct 27;8(10):e021734. doi: 10.1136/bmjopen-2018-021734 (PMC6224743; doi:10.1136/bmjopen-2018-021734), 2018-10-27
Supplement: bmjopen-2018-021734supp006.pdf [file bmjopen-2018-021734supp006.pdf]

## Supplementary table 6: Excluded Assessment Tools

| Reason                                      | Assessments                                                                                                                                                                                                                         |
|---------------------------------------------|-------------------------------------------------------------------------------------------------------------------------------------------------------------------------------------------------------------------------------------|
| Manual not available in English             | Maastricht's Motor Test (MMT)<br>The Motor-Proficiency-Test for children between 4 and 6 years of age (MOT 4-6)<br>Zuk Assessment<br>Körperkoordinationstest für Kinder (KTK)                                                       |
| Cannot extract meaningful gross motor score | Early Intervention Developmental Profile (EIDP)<br>Neurological Developmental Exam<br>Preschooler Gross Motor Quality Scale (PGMQ)<br>The Malawi Developmental Assessment Tool (MDAT)<br>Dutch table tennis motor skills assessment |
| Screening Tool                              | Brief Assessment of Motor Function (BAMF)<br>The Motor Performance Checklist<br>Motor skill checklist (MSC)                                                                                                                         |
| Diagnosis specific/requires a diagnosis     | Assessment Battery for the Atypical Handicapped Child (VAB)<br>Video-based documentation and rating system of the motor behaviour of handicapped children                                                                           |
| Only assesses one motor domain (e.g. gait)  | Standardized Walking Obstacle Course (SWOC)<br>Timed floor to stand test                                                                                                                                                            |
| Manual not published/commercially available | Rapid Neurodevelopmental Assessment (RNDA)<br>Tufts Assessment of Motor Performance (TAMP)<br>Zurich Neuromotor Assessment (ZNA)                                                                                                    |
