# Supplementary material for: Psychometric properties of gross motor assessment tools for children: a systematic review
Source: PubMed Central journal article supplement — BMJ Open. 2018 Oct 27;8(10):e021734. doi: 10.1136/bmjopen-2018-021734 (PMC6224743; doi:10.1136/bmjopen-2018-021734), 2018-10-27
Supplement: bmjopen-2018-021734supp007.pdf [file bmjopen-2018-021734supp007.pdf]

Supplementary table 7: Scoring and administration of assessment tools

| Assessment Tool                 | Scoring                                                                                                                                                    | Interpretation of scores                                                                                            |                                                                                                                         |                                       | Other                                                                                                            |
|---------------------------------|------------------------------------------------------------------------------------------------------------------------------------------------------------|---------------------------------------------------------------------------------------------------------------------|-------------------------------------------------------------------------------------------------------------------------|---------------------------------------|------------------------------------------------------------------------------------------------------------------|
| <b>Bayley-III</b> <sup>31</sup> | Motor score - gross (varying items) and fine motor (varying items) subscales. Binary score with reverse/discontinue rules                                  | Raw scores                                                                                                          | Composite scores<br>equivalents                                                                                         | Centile ranks<br>Age<br>Growth scores | Lends itself to multidisciplinary team testing.                                                                  |
| <b>BOT-2</b> <sup>12</sup>      | Fine manual (15 items) manual coordination (12 items) body coordination (16 items) strength and agility (10 items) subscales. Scoring differs for subtests | Raw scores<br>equivalents                                                                                           | Age adjusted standard scores<br>Composite scores<br>Centile ranks<br>Age<br>Descriptive categories. Complex conversions |                                       | Administration Easel includes instructions, diagrams and photos of test procedure                                |
| <b>MABC-2</b> <sup>29</sup>     | Manual dexterity (3 items), aiming & catching (2 items) and balance (3 items) subscales.                                                                   | Raw scores<br>total test score                                                                                      | component scores<br>traffic light system. Simple conversion                                                             | centile ranks                         | Also Available: MABC-2 Checklist (screening tool) and intervention manual                                        |
| <b>MAND</b> <sup>32</sup>       | Fine motor (5 items) Gross motor (5 items)                                                                                                                 | Raw scores<br>Factor scores. Complex conversions                                                                    | Scaled scores converted to an NDI.                                                                                      |                                       | Case studies included in manual for hyperactivity, encephalitis, mild head trauma, CP and muscular dystrophy     |
| <b>NSMDA</b> <sup>33</sup>      | Functional grade given for each subscale, which is combined to create an overall score.                                                                    | Indicates: normal range, minimal dysfunction, mild problems, moderate, severe or profound disability                |                                                                                                                         |                                       | Sections for comment on strengths, behavioural state during testing, musculoskeletal system and recommendations. |
| <b>PDMS-2</b> <sup>34</sup>     | GM: Stationary (30 items), locomotion (89 items), object manipulation (24 item). FM: grasping(26 items) , visual-motor integration (72 items)              | Raw scores, Age equivalent, centile rank.<br>Standard scores (subtests) Composite quotient.<br>Complex conversions. |                                                                                                                         |                                       |                                                                                                                  |
| <b>TGMD-2</b> <sup>15</sup>     | Locomotion (6 items) and Object Control (6 items). Separate male/female norms for object control subset                                                    | Raw scores, standard scores, percentile rank, age equivalent, Gross Motor Quotient. Simple conversion.              |                                                                                                                         |                                       | Simple to administer                                                                                             |

Bayley-III, Bayley Scale of Infant and Toddler Development 3<sup>rd</sup> edition <sup>31</sup>; BOT-2, Bruininks-Oseretsky Test of Motor Proficiency 2<sup>nd</sup> edition <sup>12</sup>; MABC-2, Movement Assessment Battery for Children 2<sup>nd</sup> edition <sup>29</sup>; MAND, McCarron Assessment of Neuromuscular Development <sup>32</sup>; NSMDA, Neurological Sensory Motor Developmental Assessment <sup>33</sup>; PDMS-2, Peabody Developmental Motor Scales 2<sup>nd</sup> edition <sup>34</sup>; TGMD-II, Test of Gross Motor Development 2<sup>nd</sup> edition <sup>15</sup>; GM, Gross Motor; FM, Fine Motor; NDI, Neurodevelopmental Index
